# Supplementary material for: Is the kernel–staples match a key–lock match?
Source: PubMed Central journal article supplement (PMC5914134; doi:10.1039/c7sc05019d), 2018-01-29
Supplement: SC-009-C7SC05019D-s001.pdf [file SC-009-C7SC05019D-s001.pdf]

## Supporting Information

### Is the kernel-staples match a key-lock match?

Shengli Zhuang,<sup>+a,b</sup> Lingwen Liao,<sup>+a</sup> Yan Zhao,<sup>+a,b</sup> Jinyun Yuan,<sup>c</sup> Chuanhao Yao,<sup>a</sup> Xu Liu,<sup>a,b</sup> Jin Li,<sup>d</sup> Haiteng Deng,<sup>e</sup> Jinlong Yang<sup>c</sup> and Zhikun Wu\*<sup>a</sup>

<sup>a</sup>Key Laboratory of Materials Physics, Anhui Key Laboratory of Nanomaterials and Nanotechnology, Institute of Solid State Physics, Chinese Academy of Sciences, Hefei, Anhui 230031, P.R.China

Institute of Physical Science and Information Technology, Anhui University, Hefei, Anhui 230601, P. R. China

E-mail: zkwu@issp.ac.cn

<sup>b</sup> Department of Chemistry, University of Science and Technology of China, Hefei, Anhui 230026, P.R.China

<sup>c</sup> Hefei National Laboratory for Physics Sciences at the Microscale, University of Science and Technology of China, Hefei, Anhui 230026, P.R. China

<sup>d</sup> Tsinghua University-Peking University Joint Center for Life Sciences, School of Life Sciences, Tsinghua University, Beijing 100084, P.R.China

<sup>e</sup> MOE Key Laboratory of Bioinformatics, School of Life Sciences, Tsinghua University, Beijing 100084, P.R.China

<sup>+</sup> S. Zhuang, L. Liao and Y. Zhao contributed equally to this work.

## 1. Experimental

**1.1 Chemicals.** All chemicals are commercially available and were used as received. Tetrachloroauric(III) acid ( $\text{HAuCl}_4 \cdot 4\text{H}_2\text{O}$ , >99.99% metals basis), tetraoctylammonium bromide (TOAB,  $\geq 98\%$ ), 4-tert-butylbenzenethiol (TBBTH, 97%), and sodium borohydride ( $\text{NaBH}_4$ ) were purchased from Sigma-Aldrich. Solvents: ethyl acetate (THF, 99.0%), toluene ( $\text{C}_7\text{H}_8$ , 99.5%), acetonitrile ( $\text{CH}_3\text{CN}$ , 99.0%), methanol ( $\text{CH}_3\text{OH}$ , 99.5%), dichloromethane ( $\text{CH}_2\text{Cl}_2$ , 99.0%), petroleum ether (AR), and acetic acid (AR, 99.50%) were purchased from Sinopharm Chemical Reagent Co., Ltd. The water used in all experiments was ultrapure (resistivity 18.2 M $\Omega$  cm), produced by a Milli-Q NANO pure water system.

**1.2 Synthesis of Au<sub>42</sub>(TBBT)<sub>26</sub>.** Tetraoctylammonium bromide (TOAB, 200 mg) was dissolved in 15 mL of ethyl acetate in a tri-neck flask, and HAuCl<sub>4</sub>·4H<sub>2</sub>O (100 mg, 0.243 mmol) was added to the solution. After the solution was stirred for 10 mins, 200 μL of 4-tert-butylbenzenethiol (TBBTH, 6.1 equivs./mol of Au) was added. The solution was kept under constant stirring (900 rpm) until the solution color changed from deep red to yellow, acetic acid-water (200 μL of acetic acid dissolved in 800 μL of water) was added, and then a freshly made cold water solution of NaBH<sub>4</sub> (130 mg, 14.1 equivs./mol of Au) was added all at once. The growth of gold nanoclusters was allowed to proceed for 2 h. After removing the precipitates, the concentrated solution was added to cold water, and the crude products were collected and thoroughly washed with methanol. The Au<sub>42</sub>(TBBT)<sub>26</sub> nanoclusters were separated by preparative thin-layer chromatography (PTLC, CH<sub>2</sub>Cl<sub>2</sub>–petroleum ether as developing solvent). The whole process was performed at room temperature without avoiding light or air. Synthesis of Au<sub>44</sub>(TBB)<sub>28</sub> nanocluster was referred to the previous work<sup>1</sup>.

**1.3 Characterization.** A Waters Q-TOF mass spectrometer with a Z-spray source was used to collect the electrospray ionization (ESI) mass spectra. The source temperature was kept at 70 °C, the spray voltage was adjusted to 2.20 kV and the cone voltage was kept at 60 V. Nanoclusters were dissolved in toluene (~0.5 mg/mL) and then diluted (1:1 v/v) with methanol solution, which contained 50 mM CsOAc. The prepared sample was directly infused into the chamber at 5 μL/min. The UV/vis/NIR absorption spectra were collected by a UV2600 spectrophotometer in the range of 190-900 nm at room temperature. The single-crystal X-ray diffraction data were collected on a Bruker D<sub>8</sub> VENTURE CMOS photon 100 diffractometer with helios mx multilayer monochromator Mo K $\alpha$  radiation ( $\lambda = 1.54178 \text{ \AA}$ ). X-ray Photoelectron Spectroscopy (XPS) measurements were conducted on an ESCALAB 250Xi XPS spectrometer (Thermo Scientific, America), using a monochromatized Al K $\alpha$  source and equipped with an Ar<sup>+</sup> ion sputtering gun. All binding energies were calibrated using the C (1s) carbon peak (284.8 eV). The fluorescent properties of the clusters in THF were recorded on Fluorolog-3-21 (Horiba Jobin Yvon, Japan) with a xenon lamp as the excitation source, the step and dwell times were set at 1 nm and 0.1 s, respectively, and the excitation wavelength was kept at 514 nm, with a slit of 10 nm. The luminescence decay profile was obtained under a lifetime fluorescence

spectrometer (DeltaFlex, Horiba Jobin Yvon, France).

#### 1.4 Reference

(1) C. Zeng, Y. Chen, K. Iida, K. Nobusada, K. Kirschbaum, K. J. Lambright and R. Jin, *J Am Chem Soc*, 2016, 138, 3950-3953.

## 2. Figures

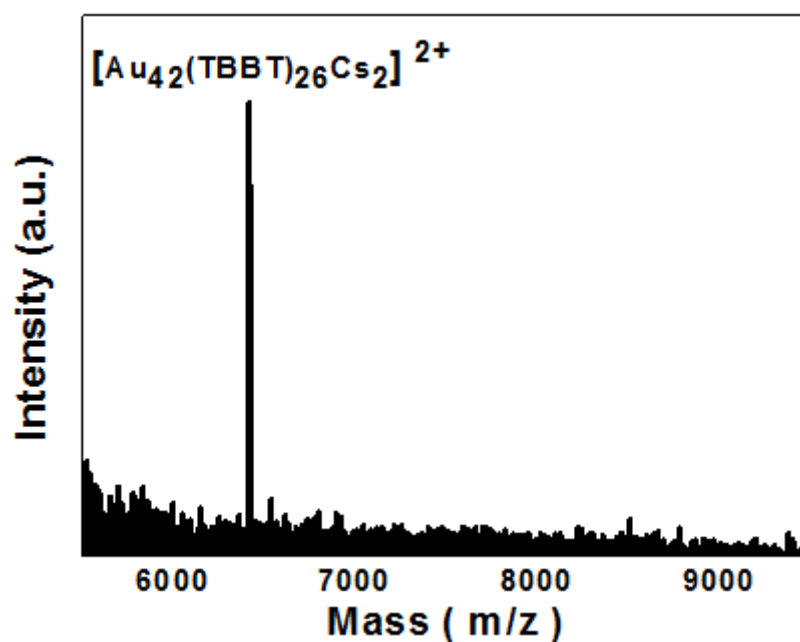

**Figure S1.** ESI mass spectrum of  $\text{Au}_{42}(\text{TBBT})_{26}$ .

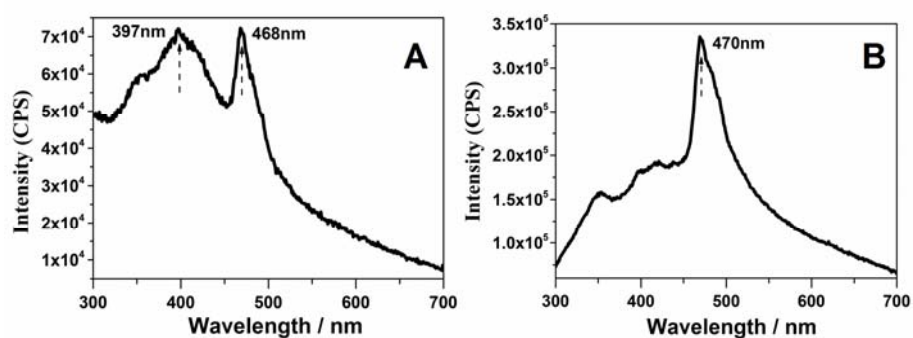

**Figure S2.** The excitation spectra of  $\text{Au}_{42}(\text{TBBT})_{26}$  (A) and  $\text{Au}_{44}(\text{TBBT})_{28}$  (B).

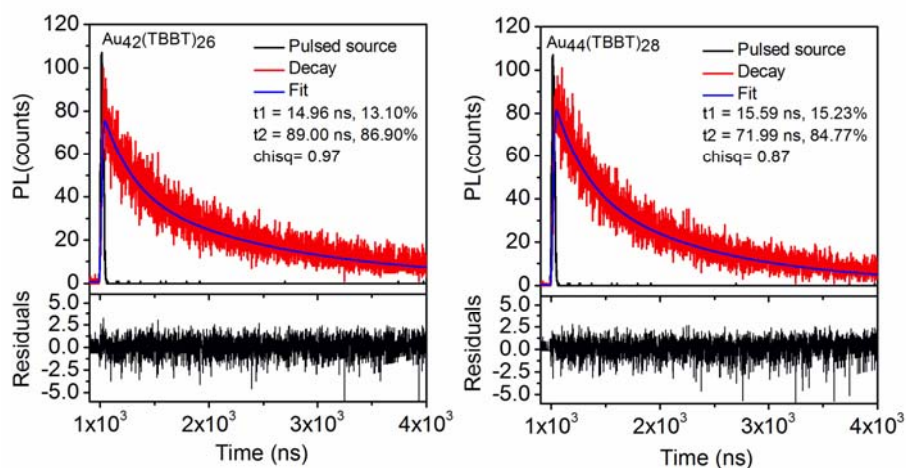

**Figure S3.** Fluorescence decay profiles of  $\text{Au}_{42}(\text{TBBT})_{26}$  and  $\text{Au}_{44}(\text{TBBT})_{28}$  nanoclusters.

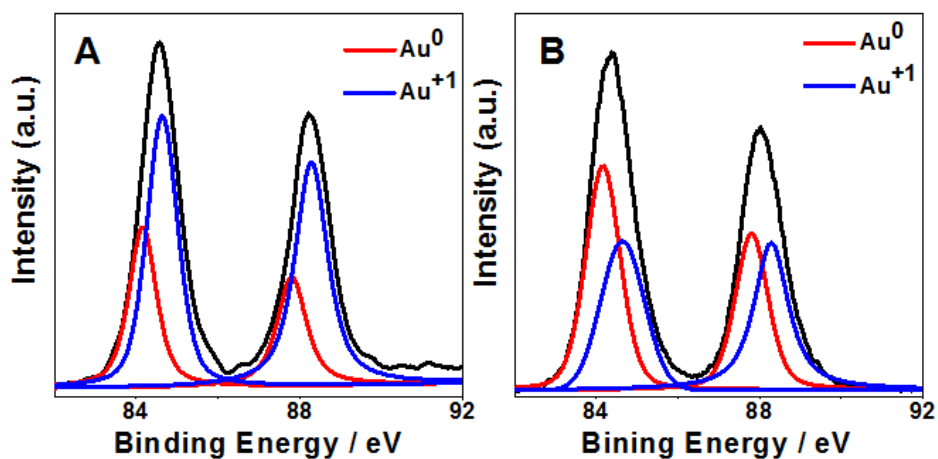

**Figure S4.** XPS spectra of  $\text{Au}_{4f}$  for  $\text{Au}_{42}(\text{TBBT})_{26}$  (A) and  $\text{Au}_{44}(\text{TBBT})_{28}$  (B).

### 3. Tables

Table 1. Crystal data and structure refinement for  $\text{Au}_{42}(\text{TBBT})_{26}$ .

|                                   |                                                                    |                              |
|-----------------------------------|--------------------------------------------------------------------|------------------------------|
| Identification code               | $\text{Au}_{42}(\text{TBBT})_{26}$                                 |                              |
| Empirical formula                 | $\text{C}_{260} \text{H}_{338} \text{Au}_{42} \text{S}_{26}$       |                              |
| Formula weight                    | 12569.44                                                           |                              |
| Temperature                       | 173 K                                                              |                              |
| Wavelength                        | 0.71073 Å                                                          |                              |
| Crystal system                    | Triclinic                                                          |                              |
| Space group                       | P - 1                                                              |                              |
| Unit cell dimensions              | $a = 24.328(2)$ Å                                                  | $\alpha = 67.732(3)^\circ$ . |
|                                   | $b = 24.845(3)$ Å                                                  | $\beta = 76.940(2)^\circ$ .  |
|                                   | $c = 32.217(3)$ Å                                                  | $\gamma = 84.496(3)^\circ$ . |
| Volume                            | $17553(3)$ Å <sup>3</sup>                                          |                              |
| Z                                 | 2                                                                  |                              |
| Density (calculated)              | 2.378 Mg/m <sup>3</sup>                                            |                              |
| Absorption coefficient            | 17.661 mm <sup>-1</sup>                                            |                              |
| F(000)                            | 11264                                                              |                              |
| Crystal size                      | 0.12 x 0.15 x 0.15 mm <sup>3</sup>                                 |                              |
| Theta range for data collection   | 2.05 to 28.40°.                                                    |                              |
| Index ranges                      | $-32 \leq h \leq 30$ , $-33 \leq k \leq 30$ , $-42 \leq l \leq 27$ |                              |
| Reflections collected             | 158151                                                             |                              |
| Independent reflections           | 86773 [R(int) = 0.0708]                                            |                              |
| Completeness to theta = 25.242°   | 99.1 %                                                             |                              |
| Absorption correction             | Semi-empirical from equivalents                                    |                              |
| Max. and min. transmission        | 0.7456 and 0.233                                                   |                              |
| Refinement method                 | Full-matrix-block least-squares on F <sup>2</sup>                  |                              |
| Data / restraints / parameters    | 86773 / 1707 / 3029                                                |                              |
| Goodness-of-fit on F <sup>2</sup> | 0.976                                                              |                              |
| Final R indices [I > 2σ(I)]       | R <sub>1</sub> = 0.0619, wR <sub>2</sub> = 0.1493                  |                              |
| R indices (all data)              | R <sub>1</sub> = 0.1144, wR <sub>2</sub> = 0.1764                  |                              |
| Extinction coefficient            | n/a                                                                |                              |
| Largest diff. peak and hole       | 4.854 and -5.691 e.Å <sup>-3</sup>                                 |                              |

Table 2. Atomic coordinates ( $\times 10^4$ ) and equivalent isotropic displacement parameters ( $\text{\AA}^2 \times 10^3$ ) for  $\text{Au}_{42}(\text{TBBT})_{26}$ .  $U(\text{eq})$  is defined as one third of the trace of the orthogonalized  $U^{ij}$  tensor.

|        | x       | y       | z       | $U(\text{eq})$ |
|--------|---------|---------|---------|----------------|
| Au(1)  | 2151(1) | 4738(1) | 2435(1) | 17             |
| Au(2)  | 2218(1) | 5624(1) | 2823(1) | 21             |
| Au(3)  | 3097(1) | 4697(1) | 2819(1) | 16             |
| Au(4)  | 3846(1) | 4726(1) | 2041(1) | 18             |
| Au(5)  | 2846(1) | 4867(1) | 1618(1) | 19             |
| Au(6)  | 1974(1) | 5707(1) | 1724(1) | 24             |
| Au(7)  | 2963(1) | 5666(1) | 1986(1) | 19             |
| Au(8)  | 4124(1) | 5780(1) | 2148(1) | 22             |
| Au(9)  | 4155(1) | 4757(1) | 3243(1) | 22             |
| Au(10) | 3247(1) | 5621(1) | 3018(1) | 22             |
| Au(11) | 2430(1) | 4764(1) | 3604(1) | 20             |
| Au(12) | 3154(1) | 3735(1) | 3725(1) | 18             |
| Au(13) | 3082(1) | 2912(1) | 3350(1) | 16             |
| Au(14) | 3058(1) | 3827(1) | 2433(1) | 14             |
| Au(15) | 2162(1) | 3787(1) | 2022(1) | 19             |
| Au(16) | 1359(1) | 3870(1) | 2817(1) | 19             |
| Au(17) | 1416(1) | 4647(1) | 3227(1) | 19             |
| Au(18) | 1043(1) | 5732(1) | 2576(1) | 24             |
| Au(19) | 1132(1) | 4820(1) | 1939(1) | 24             |
| Au(20) | 2238(1) | 3792(1) | 3292(1) | 15             |
| Au(21) | 2239(1) | 2930(1) | 2861(1) | 16             |
| Au(22) | 1410(1) | 2797(1) | 3620(1) | 20             |
| Au(23) | 1620(1) | 1966(1) | 3189(1) | 21             |
| Au(24) | 2247(1) | 1979(1) | 3785(1) | 22             |
| Au(25) | 2324(1) | 2912(1) | 4126(1) | 19             |
| Au(26) | 1749(1) | 3750(1) | 4551(1) | 23             |
| Au(27) | 3035(1) | 1879(1) | 4457(1) | 23             |
| Au(28) | 4118(1) | 2897(1) | 3820(1) | 23             |
| Au(29) | 3796(1) | 2003(1) | 3537(1) | 22             |
| Au(30) | 3092(1) | 2008(1) | 2992(1) | 20             |
| Au(31) | 3907(1) | 2833(1) | 2629(1) | 20             |
| Au(32) | 3939(1) | 3871(1) | 2858(1) | 18             |
| Au(33) | 4507(1) | 3881(1) | 1642(1) | 24             |

|        |         |         |         |    |
|--------|---------|---------|---------|----|
| Au(34) | 2384(1) | 1858(1) | 2366(1) | 24 |
| Au(35) | 2995(1) | 2953(1) | 2090(1) | 19 |
| Au(36) | 3473(1) | 3815(1) | 1164(1) | 22 |
| Au(37) | 1304(1) | 2829(1) | 2352(1) | 23 |
| Au(38) | 3499(1) | 698(1)  | 3951(1) | 25 |
| Au(39) | 2013(1) | 630(1)  | 3723(1) | 25 |
| Au(40) | 767(1)  | 3710(1) | 4061(1) | 24 |
| Au(41) | 2972(1) | 6955(1) | 2489(1) | 29 |
| Au(42) | 2000(1) | 7010(1) | 1695(1) | 31 |
| S(1)   | 3575(2) | 6483(2) | 1700(1) | 20 |
| S(2)   | 4769(2) | 5201(2) | 2557(1) | 26 |
| S(3)   | 1517(2) | 6374(2) | 2726(1) | 24 |
| S(4)   | 474(2)  | 5197(2) | 2401(1) | 27 |
| S(5)   | 1757(2) | 4496(2) | 1431(1) | 24 |
| S(6)   | 1906(2) | 4723(2) | 4336(1) | 25 |
| S(7)   | 1636(2) | 2755(2) | 4831(1) | 24 |
| S(8)   | 3613(2) | 2475(2) | 4564(1) | 22 |
| S(9)   | 4696(2) | 3227(2) | 3103(1) | 26 |
| S(10)  | 4602(2) | 2884(2) | 1963(1) | 23 |
| S(11)  | 4501(2) | 4890(2) | 1324(1) | 22 |
| S(12)  | 2937(2) | 1202(2) | 2819(1) | 23 |
| S(13)  | 3392(2) | 4812(2) | 918(1)  | 23 |
| S(14)  | 3598(2) | 2814(2) | 1429(1) | 24 |
| S(15)  | 1818(2) | 2392(2) | 1864(1) | 26 |
| S(16)  | 682(2)  | 3236(2) | 2812(1) | 23 |
| S(17)  | 4276(2) | 1179(2) | 3944(1) | 25 |
| S(18)  | 2754(2) | 116(2)  | 4049(1) | 31 |
| S(19)  | 1250(2) | 1036(2) | 3390(1) | 25 |
| S(20)  | 2449(2) | 1208(2) | 4445(1) | 23 |
| S(21)  | 619(2)  | 2740(2) | 4231(1) | 25 |
| S(22)  | 769(2)  | 4708(2) | 3888(1) | 25 |
| S(23)  | 3590(2) | 4361(2) | 3966(1) | 22 |
| S(24)  | 3560(2) | 6502(2) | 2995(1) | 27 |
| S(25)  | 2416(2) | 7536(2) | 1994(1) | 32 |
| S(26)  | 1549(2) | 6592(2) | 1338(1) | 30 |
| C(1)   | 1158(5) | 6366(6) | 3281(4) | 16 |
| C(2)   | 707(6)  | 6771(7) | 3301(5) | 25 |
| C(3)   | 425(8)  | 6787(9) | 3726(6) | 43 |

|       |           |          |          |     |
|-------|-----------|----------|----------|-----|
| C(4)  | 580(7)    | 6422(8)  | 4120(5)  | 33  |
| C(5)  | 1024(7)   | 6050(8)  | 4103(6)  | 33  |
| C(6)  | 1324(7)   | 6045(8)  | 3678(5)  | 30  |
| C(7)  | 209(8)    | 6435(10) | 4594(7)  | 50  |
| C(8)  | 466(8)    | 6061(9)  | 4977(6)  | 52  |
| C(9)  | -352(9)   | 6221(11) | 4648(8)  | 75  |
| C(10) | 193(13)   | 7046(14) | 4603(10) | 117 |
| C(11) | 1389(6)   | 4192(7)  | 1164(5)  | 23  |
| C(12) | 906(7)    | 4441(9)  | 1024(6)  | 40  |
| C(13) | 664(9)    | 4226(10) | 765(7)   | 54  |
| C(14) | 892(9)    | 3759(10) | 650(7)   | 55  |
| C(15) | 1385(7)   | 3515(9)  | 789(6)   | 40  |
| C(16) | 1624(6)   | 3725(7)  | 1050(5)  | 28  |
| C(17) | 595(11)   | 3471(13) | 369(9)   | 77  |
| C(18) | 23(11)    | 3182(13) | 715(9)   | 98  |
| C(19) | 408(11)   | 3941(12) | 1(8)     | 92  |
| C(20) | 862(16)   | 2933(17) | 311(13)  | 166 |
| C(21) | 88(7)     | 5751(8)  | 2040(6)  | 31  |
| C(22) | 173(9)    | 5903(10) | 1567(7)  | 55  |
| C(23) | -161(9)   | 6354(11) | 1310(8)  | 69  |
| C(24) | -575(15)  | 6627(15) | 1530(12) | 141 |
| C(25) | -671(9)   | 6473(10) | 1997(7)  | 59  |
| C(26) | -325(9)   | 6041(10) | 2259(8)  | 63  |
| C(27) | -950(11)  | 7072(12) | 1237(9)  | 156 |
| C(28) | -634(12)  | 7434(15) | 760(10)  | 174 |
| C(29) | -1427(13) | 6811(13) | 1142(11) | 164 |
| C(30) | -1231(14) | 7502(14) | 1452(10) | 179 |
| C(31) | 2411(6)   | 4750(7)  | 4653(5)  | 20  |
| C(32) | 2448(6)   | 4318(7)  | 5067(5)  | 26  |
| C(33) | 2834(6)   | 4368(8)  | 5314(6)  | 32  |
| C(34) | 3198(6)   | 4830(7)  | 5151(5)  | 26  |
| C(35) | 3164(7)   | 5268(8)  | 4723(6)  | 36  |
| C(36) | 2765(6)   | 5230(7)  | 4485(5)  | 22  |
| C(37) | 3645(7)   | 4888(8)  | 5390(6)  | 38  |
| C(38) | 3553(7)   | 5450(8)  | 5492(6)  | 37  |
| C(39) | 3642(7)   | 4381(8)  | 5854(6)  | 41  |
| C(40) | 4223(7)   | 4904(9)  | 5092(6)  | 43  |
| C(41) | 1922(6)   | 2490(7)  | 5347(5)  | 20  |



|       |          |          |         |    |
|-------|----------|----------|---------|----|
| C(42) | 2203(6)  | 1980(8)  | 5478(5) | 30 |
| C(43) | 2361(6)  | 1761(8)  | 5910(5) | 30 |
| C(44) | 2277(7)  | 2065(8)  | 6187(5) | 31 |
| C(45) | 1975(8)  | 2582(9)  | 6060(6) | 45 |
| C(46) | 1801(7)  | 2789(8)  | 5654(6) | 37 |
| C(47) | 2480(9)  | 1816(10) | 6643(7) | 53 |
| C(48) | 2292(10) | 2162(11) | 6939(8) | 78 |
| C(49) | 3110(10) | 1810(13) | 6538(9) | 93 |
| C(50) | 2269(11) | 1216(12) | 6904(9) | 95 |
| C(51) | 5246(6)  | 3647(7)  | 3091(5) | 19 |
| C(52) | 5581(7)  | 3964(8)  | 2663(5) | 33 |
| C(53) | 6030(7)  | 4284(8)  | 2631(6) | 32 |
| C(54) | 6177(6)  | 4304(7)  | 3014(5) | 26 |
| C(55) | 5847(7)  | 4006(8)  | 3424(6) | 35 |
| C(56) | 5395(7)  | 3685(8)  | 3466(6) | 34 |
| C(57) | 6672(8)  | 4659(9)  | 2989(6) | 45 |
| C(58) | 6962(8)  | 4981(9)  | 2499(6) | 53 |
| C(59) | 6474(8)  | 5114(9)  | 3199(7) | 52 |
| C(60) | 7097(8)  | 4244(10) | 3236(7) | 60 |
| C(61) | 5178(6)  | 5141(7)  | 1334(5) | 24 |
| C(62) | 5623(6)  | 4756(8)  | 1440(5) | 28 |
| C(63) | 6150(6)  | 4983(7)  | 1363(5) | 28 |
| C(64) | 6276(7)  | 5552(8)  | 1160(5) | 29 |
| C(65) | 5784(6)  | 5930(7)  | 1084(5) | 26 |
| C(66) | 5268(7)  | 5709(8)  | 1164(5) | 29 |
| C(67) | 6850(8)  | 5813(9)  | 1018(6) | 44 |
| C(68) | 6982(8)  | 6113(9)  | 471(6)  | 50 |
| C(69) | 7299(7)  | 5327(9)  | 1127(6) | 47 |
| C(70) | 6906(8)  | 6231(10) | 1232(7) | 58 |
| C(71) | 5295(6)  | 2824(7)  | 2075(5) | 21 |
| C(72) | 5744(7)  | 3120(8)  | 1732(6) | 36 |
| C(73) | 6269(6)  | 3062(7)  | 1800(5) | 27 |
| C(74) | 6408(7)  | 2741(9)  | 2223(6) | 45 |
| C(75) | 5976(7)  | 2406(8)  | 2564(6) | 37 |
| C(76) | 5432(6)  | 2445(7)  | 2491(5) | 24 |
| C(77) | 7007(7)  | 2689(9)  | 2296(6) | 58 |
| C(78) | 7132(10) | 2165(10) | 2700(8) | 88 |
| C(79) | 7400(10) | 2531(12) | 1915(8) | 93 |

|        |          |          |          |     |
|--------|----------|----------|----------|-----|
| C(80)  | 7158(11) | 3258(10) | 2283(10) | 104 |
| C(81)  | 2890(6)  | 5061(7)  | 559(5)   | 21  |
| C(82)  | 2727(7)  | 5653(8)  | 453(5)   | 31  |
| C(83)  | 2336(7)  | 5895(8)  | 183(6)   | 37  |
| C(84)  | 2087(6)  | 5537(8)  | 21(5)    | 28  |
| C(85)  | 2247(6)  | 4974(7)  | 119(5)   | 28  |
| C(86)  | 2668(6)  | 4720(8)  | 393(5)   | 29  |
| C(87)  | 1629(9)  | 5825(11) | -269(8)  | 63  |
| C(88)  | 1383(8)  | 5380(9)  | -406(7)  | 52  |
| C(89)  | 1150(9)  | 6045(11) | 36(8)    | 68  |
| C(90)  | 1920(10) | 6319(11) | -710(8)  | 73  |
| C(91)  | 3211(6)  | 2517(7)  | 1160(5)  | 21  |
| C(92)  | 2977(6)  | 2867(8)  | 789(5)   | 32  |
| C(93)  | 2723(7)  | 2582(8)  | 578(6)   | 36  |
| C(94)  | 2715(7)  | 1999(8)  | 693(6)   | 41  |
| C(95)  | 2947(7)  | 1650(8)  | 1074(5)  | 32  |
| C(96)  | 3196(6)  | 1926(8)  | 1297(5)  | 30  |
| C(97)  | 2472(8)  | 1697(8)  | 440(6)   | 54  |
| C(98)  | 1954(9)  | 1364(11) | 736(8)   | 87  |
| C(99)  | 2911(11) | 1298(12) | 280(10)  | 112 |
| C(100) | 2293(11) | 2123(11) | 4(7)     | 92  |
| C(101) | 176(6)   | 3659(7)  | 2488(5)  | 18  |
| C(102) | 162(7)   | 3631(8)  | 2073(6)  | 39  |
| C(103) | -284(7)  | 3963(9)  | 1856(6)  | 45  |
| C(104) | -668(7)  | 4304(8)  | 2034(5)  | 32  |
| C(105) | -619(7)  | 4288(8)  | 2460(5)  | 32  |
| C(106) | -223(7)  | 3985(8)  | 2691(6)  | 36  |
| C(107) | -1129(7) | 4633(8)  | 1777(6)  | 35  |
| C(108) | -842(7)  | 5023(9)  | 1274(6)  | 48  |
| C(109) | -1431(7) | 5077(9)  | 1979(6)  | 47  |
| C(110) | -1530(8) | 4216(10) | 1786(7)  | 54  |
| C(111) | 1362(7)  | 1849(8)  | 1856(6)  | 35  |
| C(112) | 1471(10) | 1263(12) | 2053(8)  | 75  |
| C(113) | 1116(10) | 904(13)  | 2023(8)  | 80  |
| C(114) | 679(11)  | 1071(13) | 1788(9)  | 83  |
| C(115) | 591(8)   | 1633(10) | 1602(7)  | 49  |
| C(116) | 935(8)   | 2077(10) | 1628(6)  | 50  |
| C(117) | 302(13)  | 658(15)  | 1752(11) | 100 |

|        |           |           |          |     |
|--------|-----------|-----------|----------|-----|
| C(118) | -92(13)   | 895(14)   | 1438(10) | 127 |
| C(119) | 48(13)    | 210(15)   | 2232(10) | 124 |
| C(120) | 679(13)   | 237(14)   | 1579(11) | 127 |
| C(121) | 3504(6)   | 1078(7)   | 2394(5)  | 27  |
| C(122) | 3987(6)   | 1371(7)   | 2221(5)  | 23  |
| C(123) | 4402(7)   | 1269(7)   | 1889(5)  | 30  |
| C(124) | 4328(7)   | 824(8)    | 1737(6)  | 34  |
| C(125) | 3832(7)   | 540(8)    | 1910(6)  | 37  |
| C(126) | 3406(7)   | 650(8)    | 2238(5)  | 33  |
| C(127) | 4746(8)   | 708(9)    | 1330(6)  | 43  |
| C(128) | 5317(9)   | 1050(11)  | 1216(7)  | 68  |
| C(129) | 4887(9)   | 66(9)     | 1469(7)  | 58  |
| C(130) | 4474(9)   | 916(10)   | 923(6)   | 59  |
| C(131) | 655(6)    | 990(7)    | 3860(5)  | 19  |
| C(132) | 130(6)    | 882(8)    | 3801(6)  | 33  |
| C(133) | -338(7)   | 820(8)    | 4163(5)  | 34  |
| C(134) | -290(7)   | 900(8)    | 4549(6)  | 38  |
| C(135) | 236(7)    | 1001(8)   | 4605(6)  | 35  |
| C(136) | 704(7)    | 1041(7)   | 4255(5)  | 30  |
| C(137) | -817(7)   | 832(9)    | 4946(6)  | 40  |
| C(138) | -653(9)   | 552(10)   | 5408(7)  | 60  |
| C(139) | -1258(9)  | 476(11)   | 4925(8)  | 71  |
| C(140) | -1025(10) | 1432(11)  | 4896(8)  | 88  |
| C(141) | 3008(6)   | -332(7)   | 3717(5)  | 24  |
| C(142) | 3523(6)   | -186(7)   | 3390(5)  | 24  |
| C(143) | 3738(7)   | -581(8)   | 3153(6)  | 33  |
| C(144) | 3434(7)   | -1044(8)  | 3223(6)  | 38  |
| C(145) | 2939(8)   | -1164(10) | 3529(7)  | 55  |
| C(146) | 2736(8)   | -817(9)   | 3780(6)  | 46  |
| C(147) | 3683(8)   | -1479(10) | 2964(7)  | 51  |
| C(148) | 3227(9)   | -1864(10) | 2990(7)  | 64  |
| C(149) | 3869(9)   | -1091(10) | 2455(6)  | 59  |
| C(150) | 4163(9)   | -1830(11) | 3181(8)  | 71  |
| C(151) | 4829(6)   | 1020(7)   | 3537(5)  | 19  |
| C(152) | 5367(6)   | 921(7)    | 3621(5)  | 27  |
| C(153) | 5806(8)   | 795(8)    | 3322(6)  | 41  |
| C(154) | 5731(8)   | 746(9)    | 2915(6)  | 44  |
| C(155) | 5173(7)   | 840(8)    | 2833(6)  | 39  |

|        |          |          |         |     |
|--------|----------|----------|---------|-----|
| C(156) | 4738(7)  | 1000(8)  | 3133(5) | 34  |
| C(157) | 6200(9)  | 577(11)  | 2588(7) | 58  |
| C(158) | 6280(10) | 1114(11) | 2132(7) | 75  |
| C(159) | 6741(9)  | 470(11)  | 2732(8) | 79  |
| C(160) | 6033(11) | 47(12)   | 2530(9) | 94  |
| C(161) | 4095(6)  | 2012(7)  | 4882(5) | 21  |
| C(162) | 4655(6)  | 1931(7)  | 4680(5) | 30  |
| C(163) | 5016(7)  | 1570(8)  | 4961(6) | 39  |
| C(164) | 4834(7)  | 1279(8)  | 5430(6) | 34  |
| C(165) | 4258(7)  | 1373(8)  | 5631(6) | 42  |
| C(166) | 3911(6)  | 1732(7)  | 5348(5) | 24  |
| C(167) | 5251(7)  | 906(8)   | 5722(6) | 40  |
| C(168) | 5482(9)  | 440(10)  | 5520(7) | 58  |
| C(169) | 5729(8)  | 1305(9)  | 5694(7) | 55  |
| C(170) | 4975(8)  | 611(9)   | 6220(6) | 47  |
| C(171) | 1871(6)  | 1095(7)  | 4932(5) | 28  |
| C(172) | 1947(6)  | 658(7)   | 5338(5) | 26  |
| C(173) | 1546(8)  | 593(9)   | 5737(6) | 46  |
| C(174) | 1065(7)  | 952(8)   | 5741(6) | 38  |
| C(175) | 1007(7)  | 1360(8)  | 5330(5) | 31  |
| C(176) | 1399(7)  | 1458(8)  | 4923(6) | 34  |
| C(177) | 623(8)   | 924(10)  | 6193(7) | 48  |
| C(178) | 198(9)   | 1359(11) | 6141(8) | 75  |
| C(179) | 315(10)  | 356(11)  | 6356(8) | 83  |
| C(180) | 942(11)  | 884(13)  | 6539(9) | 103 |
| C(181) | 102(6)   | 4941(7)  | 3739(5) | 21  |
| C(182) | -112(7)  | 5463(8)  | 3741(6) | 39  |
| C(183) | -646(7)  | 5646(9)  | 3664(6) | 43  |
| C(184) | -963(7)  | 5324(8)  | 3548(6) | 33  |
| C(185) | -739(7)  | 4792(8)  | 3512(5) | 33  |
| C(186) | -223(6)  | 4617(8)  | 3608(5) | 30  |
| C(187) | -1592(8) | 5459(9)  | 3505(6) | 44  |
| C(188) | -1985(8) | 5033(9)  | 3904(6) | 53  |
| C(189) | -1702(9) | 5445(10) | 3057(7) | 64  |
| C(190) | -1756(8) | 6081(9)  | 3514(7) | 59  |
| C(191) | 5(6)     | 2749(7)  | 4021(5) | 22  |
| C(192) | -43(7)   | 2389(8)  | 3796(5) | 32  |
| C(193) | -540(6)  | 2372(7)  | 3653(5) | 29  |

|        |           |          |         |     |
|--------|-----------|----------|---------|-----|
| C(194) | -999(8)   | 2707(9)  | 3722(6) | 47  |
| C(195) | -951(7)   | 3066(8)  | 3951(6) | 40  |
| C(196) | -459(6)   | 3079(7)  | 4105(5) | 26  |
| C(197) | -1540(9)  | 2685(11) | 3560(7) | 58  |
| C(198) | -1399(10) | 2812(12) | 3055(8) | 81  |
| C(199) | -1763(11) | 2090(12) | 3753(9) | 94  |
| C(200) | -1982(11) | 3122(13) | 3658(9) | 99  |
| C(201) | 4027(6)   | 3991(6)  | 4366(4) | 16  |
| C(202) | 3773(7)   | 3605(7)  | 4785(5) | 28  |
| C(203) | 4072(6)   | 3312(7)  | 5125(5) | 24  |
| C(204) | 4644(6)   | 3417(7)  | 5052(5) | 25  |
| C(205) | 4900(6)   | 3796(7)  | 4628(5) | 28  |
| C(206) | 4590(6)   | 4086(7)  | 4293(5) | 29  |
| C(207) | 5010(7)   | 3109(8)  | 5426(5) | 32  |
| C(208) | 5149(7)   | 3562(8)  | 5594(6) | 36  |
| C(209) | 5544(7)   | 2870(9)  | 5200(6) | 43  |
| C(210) | 4681(7)   | 2615(8)  | 5837(6) | 43  |
| C(211) | 1945(6)   | 6945(8)  | 764(5)  | 30  |
| C(212) | 2526(7)   | 6943(8)  | 649(5)  | 31  |
| C(213) | 2818(7)   | 7231(8)  | 219(5)  | 32  |
| C(214) | 2532(8)   | 7533(9)  | -130(6) | 46  |
| C(215) | 1945(8)   | 7525(9)  | -15(7)  | 50  |
| C(216) | 1647(7)   | 7209(8)  | 432(5)  | 32  |
| C(217) | 2889(9)   | 7854(11) | -627(8) | 63  |
| C(218) | 3234(10)  | 7451(11) | -800(8) | 84  |
| C(219) | 2488(11)  | 8160(13) | -950(9) | 98  |
| C(220) | 3236(10)  | 8324(12) | -619(8) | 87  |
| C(221) | 2920(6)   | 7998(7)  | 1538(5) | 27  |
| C(222) | 2991(9)   | 8021(10) | 1090(7) | 57  |
| C(223) | 3380(9)   | 8402(10) | 747(7)  | 59  |
| C(224) | 3677(11)  | 8770(12) | 827(9)  | 89  |
| C(225) | 3640(8)   | 8743(9)  | 1279(7) | 52  |
| C(226) | 3232(7)   | 8368(8)  | 1618(6) | 39  |
| C(227) | 4082(10)  | 9193(11) | 424(8)  | 102 |
| C(228) | 3879(13)  | 9483(14) | -21(9)  | 126 |
| C(229) | 4240(13)  | 9704(13) | 527(11) | 126 |
| C(230) | 3198(6)   | 6587(7)  | 3505(5) | 22  |
| C(231) | 3514(7)   | 6689(8)  | 3793(5) | 32  |

|        |          |          |          |     |
|--------|----------|----------|----------|-----|
| C(232) | 3265(8)  | 6807(9)  | 4164(6)  | 44  |
| C(233) | 2674(7)  | 6870(8)  | 4283(6)  | 34  |
| C(234) | 2347(8)  | 6781(9)  | 3992(6)  | 42  |
| C(235) | 2613(6)  | 6677(7)  | 3607(5)  | 27  |
| C(236) | 2379(9)  | 7001(10) | 4708(7)  | 57  |
| C(237) | 2080(10) | 6418(11) | 5069(8)  | 78  |
| C(238) | 2778(11) | 7145(13) | 4926(9)  | 97  |
| C(239) | 1922(11) | 7456(13) | 4609(10) | 105 |
| C(240) | 5147(6)  | 5728(7)  | 2622(5)  | 24  |
| C(241) | 5040(7)  | 5887(8)  | 3002(6)  | 33  |
| C(242) | 5346(6)  | 6324(7)  | 3017(5)  | 29  |
| C(243) | 5768(7)  | 6614(8)  | 2659(6)  | 37  |
| C(244) | 5871(7)  | 6461(9)  | 2270(6)  | 40  |
| C(245) | 5588(7)  | 6028(8)  | 2262(6)  | 37  |
| C(246) | 6095(9)  | 7077(10) | 2683(7)  | 53  |
| C(247) | 6427(12) | 6807(14) | 3053(10) | 124 |
| C(248) | 6507(11) | 7390(13) | 2222(9)  | 102 |
| C(249) | 5721(13) | 7525(15) | 2778(11) | 132 |
| C(250) | 3928(6)  | 6606(8)  | 1122(5)  | 30  |
| C(251) | 3869(5)  | 6234(6)  | 892(4)   | 17  |
| C(252) | 4183(6)  | 6326(7)  | 468(5)   | 25  |
| C(253) | 4576(6)  | 6779(7)  | 242(5)   | 28  |
| C(254) | 4623(7)  | 7121(8)  | 465(5)   | 30  |
| C(255) | 4303(6)  | 7052(8)  | 897(5)   | 32  |
| C(256) | 4982(8)  | 6858(9)  | -227(6)  | 46  |
| C(257) | 4889(10) | 6361(11) | -375(8)  | 71  |
| C(258) | 4917(14) | 7393(15) | -569(11) | 150 |
| C(259) | 5567(11) | 6727(14) | -163(10) | 113 |
| C(260) | 4634(11) | 8877(13) | 336(10)  | 117 |

---

Table 3. Bond lengths [ $\text{\AA}$ ] and angles [ $^\circ$ ] for  $\text{Au}_{42}(\text{TBBT})_{26}$ .

---

|              |            |
|--------------|------------|
| Au(1)-Au(2)  | 2.9463(9)  |
| Au(1)-Au(3)  | 2.8265(7)  |
| Au(1)-Au(5)  | 2.7095(7)  |
| Au(1)-Au(6)  | 2.7013(8)  |
| Au(1)-Au(7)  | 2.8940(8)  |
| Au(1)-Au(14) | 3.0056(8)  |
| Au(1)-Au(15) | 3.1157(9)  |
| Au(1)-Au(16) | 2.7525(8)  |
| Au(1)-Au(17) | 2.7076(7)  |
| Au(1)-Au(19) | 3.1898(8)  |
| Au(1)-Au(20) | 2.9047(7)  |
| Au(2)-Au(3)  | 2.9896(8)  |
| Au(2)-Au(7)  | 2.8601(8)  |
| Au(2)-Au(10) | 2.7156(8)  |
| Au(2)-Au(11) | 2.7340(8)  |
| Au(2)-Au(17) | 2.9590(9)  |
| Au(2)-Au(18) | 3.0950(8)  |
| Au(2)-S(3)   | 2.379(4)   |
| Au(3)-Au(4)  | 2.7269(7)  |
| Au(3)-Au(7)  | 2.9080(8)  |
| Au(3)-Au(9)  | 3.2136(8)  |
| Au(3)-Au(10) | 2.6805(9)  |
| Au(3)-Au(11) | 2.7320(8)  |
| Au(3)-Au(12) | 3.0132(8)  |
| Au(3)-Au(14) | 2.8923(9)  |
| Au(3)-Au(20) | 2.9349(8)  |
| Au(3)-Au(32) | 2.7477(8)  |
| Au(4)-Au(5)  | 2.9795(7)  |
| Au(4)-Au(7)  | 2.9998(8)  |
| Au(4)-Au(8)  | 2.9223(10) |
| Au(4)-Au(14) | 2.8027(8)  |
| Au(4)-Au(32) | 2.7253(8)  |
| Au(4)-Au(33) | 3.0179(9)  |
| Au(4)-S(11)  | 2.407(3)   |
| Au(5)-Au(6)  | 2.8855(9)  |
| Au(5)-Au(7)  | 2.7322(9)  |

|               |            |
|---------------|------------|
| Au(5)-Au(14)  | 3.0074(8)  |
| Au(5)-Au(15)  | 2.9824(9)  |
| Au(5)-S(13)   | 2.392(4)   |
| Au(6)-Au(7)   | 2.7034(8)  |
| Au(6)-Au(18)  | 3.1568(8)  |
| Au(6)-Au(19)  | 2.9336(9)  |
| Au(6)-Au(42)  | 3.2100(11) |
| Au(6)-S(26)   | 2.352(4)   |
| Au(7)-Au(8)   | 3.0422(8)  |
| Au(7)-S(1)    | 2.392(4)   |
| Au(8)-Au(10)  | 3.0307(8)  |
| Au(8)-S(1)    | 2.329(4)   |
| Au(8)-S(2)    | 2.311(4)   |
| Au(9)-Au(10)  | 2.9394(8)  |
| Au(9)-Au(12)  | 3.3574(9)  |
| Au(9)-Au(32)  | 3.0409(9)  |
| Au(9)-S(2)    | 2.303(4)   |
| Au(9)-S(23)   | 2.315(4)   |
| Au(10)-Au(11) | 2.8494(9)  |
| Au(10)-Au(41) | 3.1853(10) |
| Au(10)-S(24)  | 2.356(5)   |
| Au(11)-Au(12) | 2.9119(8)  |
| Au(11)-Au(17) | 3.0687(8)  |
| Au(11)-Au(20) | 3.0568(9)  |
| Au(11)-Au(26) | 3.3304(9)  |
| Au(11)-S(6)   | 2.383(4)   |
| Au(12)-Au(13) | 2.7753(9)  |
| Au(12)-Au(20) | 2.8519(7)  |
| Au(12)-Au(25) | 2.7477(9)  |
| Au(12)-Au(28) | 2.9720(8)  |
| Au(12)-Au(32) | 2.9260(8)  |
| Au(12)-S(23)  | 2.398(4)   |
| Au(13)-Au(14) | 2.9781(7)  |
| Au(13)-Au(20) | 2.8323(8)  |
| Au(13)-Au(21) | 2.8414(7)  |
| Au(13)-Au(24) | 2.9353(9)  |
| Au(13)-Au(25) | 2.7504(7)  |
| Au(13)-Au(28) | 3.2118(8)  |



|               |           |
|---------------|-----------|
| Au(13)-Au(29) | 2.6792(8) |
| Au(13)-Au(30) | 2.8848(9) |
| Au(13)-Au(31) | 2.7624(8) |
| Au(13)-Au(32) | 3.0235(9) |
| Au(14)-Au(15) | 2.8212(7) |
| Au(14)-Au(20) | 2.9987(7) |
| Au(14)-Au(21) | 2.8498(8) |
| Au(14)-Au(31) | 3.0334(8) |
| Au(14)-Au(32) | 2.8237(7) |
| Au(14)-Au(35) | 2.8136(9) |
| Au(15)-Au(16) | 2.9119(8) |
| Au(15)-Au(21) | 2.7710(8) |
| Au(15)-Au(35) | 2.7382(8) |
| Au(15)-Au(37) | 3.0313(9) |
| Au(15)-S(5)   | 2.381(4)  |
| Au(16)-Au(17) | 2.7488(9) |
| Au(16)-Au(19) | 3.0428(8) |
| Au(16)-Au(20) | 2.8497(7) |
| Au(16)-Au(21) | 2.9985(8) |
| Au(16)-Au(22) | 2.9450(8) |
| Au(16)-S(16)  | 2.393(4)  |
| Au(17)-Au(18) | 2.9294(9) |
| Au(17)-Au(20) | 2.7572(8) |
| Au(17)-Au(40) | 3.0302(9) |
| Au(17)-S(22)  | 2.392(4)  |
| Au(18)-S(3)   | 2.300(4)  |
| Au(18)-S(4)   | 2.297(4)  |
| Au(19)-S(4)   | 2.314(4)  |
| Au(19)-S(5)   | 2.297(4)  |
| Au(20)-Au(21) | 2.9591(9) |
| Au(20)-Au(22) | 3.0497(9) |
| Au(20)-Au(25) | 2.7860(8) |
| Au(21)-Au(22) | 2.7277(7) |
| Au(21)-Au(23) | 2.6781(9) |
| Au(21)-Au(24) | 3.0198(8) |
| Au(21)-Au(30) | 2.9106(8) |
| Au(21)-Au(35) | 2.7202(7) |
| Au(21)-Au(37) | 3.1690(8) |

|               |            |
|---------------|------------|
| Au(22)-Au(23) | 2.8451(9)  |
| Au(22)-Au(24) | 2.7265(8)  |
| Au(22)-Au(25) | 3.1309(8)  |
| Au(22)-Au(40) | 3.2196(9)  |
| Au(22)-S(21)  | 2.394(4)   |
| Au(23)-Au(24) | 2.7188(8)  |
| Au(23)-Au(34) | 2.9627(8)  |
| Au(23)-Au(37) | 2.9495(8)  |
| Au(23)-Au(39) | 3.2705(9)  |
| Au(23)-S(19)  | 2.359(4)   |
| Au(24)-Au(25) | 2.9528(9)  |
| Au(24)-Au(27) | 3.1324(8)  |
| Au(24)-Au(30) | 2.8764(8)  |
| Au(24)-S(20)  | 2.374(4)   |
| Au(25)-Au(26) | 2.9848(9)  |
| Au(25)-Au(27) | 2.9367(8)  |
| Au(25)-S(7)   | 2.417(4)   |
| Au(26)-Au(40) | 3.1762(8)  |
| Au(26)-S(6)   | 2.294(5)   |
| Au(26)-S(7)   | 2.309(4)   |
| Au(27)-Au(29) | 3.0425(8)  |
| Au(27)-S(8)   | 2.300(4)   |
| Au(27)-S(20)  | 2.313(4)   |
| Au(28)-Au(29) | 2.9276(10) |
| Au(28)-Au(32) | 3.2220(8)  |
| Au(28)-S(8)   | 2.315(4)   |
| Au(28)-S(9)   | 2.302(4)   |
| Au(29)-Au(30) | 2.7133(8)  |
| Au(29)-Au(31) | 2.8382(8)  |
| Au(29)-Au(38) | 3.0898(10) |
| Au(29)-S(17)  | 2.339(4)   |
| Au(30)-Au(31) | 2.7229(9)  |
| Au(30)-Au(34) | 3.0724(8)  |
| Au(30)-Au(35) | 3.0066(8)  |
| Au(30)-S(12)  | 2.355(4)   |
| Au(31)-Au(32) | 2.9510(9)  |
| Au(31)-Au(33) | 3.3731(9)  |
| Au(31)-Au(35) | 3.0412(8)  |

|               |            |
|---------------|------------|
| Au(31)-S(10)  | 2.381(4)   |
| Au(32)-S(9)   | 2.388(4)   |
| Au(33)-Au(36) | 3.2799(8)  |
| Au(33)-S(10)  | 2.307(4)   |
| Au(33)-S(11)  | 2.321(4)   |
| Au(34)-Au(35) | 2.9582(10) |
| Au(34)-S(12)  | 2.294(4)   |
| Au(34)-S(15)  | 2.302(4)   |
| Au(35)-Au(36) | 2.9854(8)  |
| Au(35)-S(14)  | 2.420(4)   |
| Au(36)-S(13)  | 2.299(4)   |
| Au(36)-S(14)  | 2.318(4)   |
| Au(37)-S(15)  | 2.313(4)   |
| Au(37)-S(16)  | 2.311(4)   |
| Au(38)-S(17)  | 2.323(4)   |
| Au(38)-S(18)  | 2.318(5)   |
| Au(39)-S(18)  | 2.319(4)   |
| Au(39)-S(19)  | 2.310(4)   |
| Au(40)-S(21)  | 2.305(5)   |
| Au(40)-S(22)  | 2.328(5)   |
| Au(41)-S(24)  | 2.308(4)   |
| Au(41)-S(25)  | 2.306(4)   |
| Au(42)-S(25)  | 2.301(5)   |
| Au(42)-S(26)  | 2.304(5)   |
| S(1)-C(250)   | 1.789(16)  |
| S(2)-C(240)   | 1.767(17)  |
| S(3)-C(1)     | 1.800(13)  |
| S(4)-C(21)    | 1.778(16)  |
| S(5)-C(11)    | 1.757(15)  |
| S(6)-C(31)    | 1.787(14)  |
| S(7)-C(41)    | 1.815(14)  |
| S(8)-C(161)   | 1.772(14)  |
| S(9)-C(51)    | 1.759(16)  |
| S(10)-C(71)   | 1.782(14)  |
| S(11)-C(61)   | 1.828(15)  |
| S(12)-C(121)  | 1.804(16)  |
| S(13)-C(81)   | 1.777(14)  |
| S(14)-C(91)   | 1.779(15)  |

|              |           |
|--------------|-----------|
| S(15)-C(111) | 1.838(19) |
| S(16)-C(101) | 1.792(13) |
| S(17)-C(151) | 1.783(15) |
| S(18)-C(141) | 1.800(16) |
| S(19)-C(131) | 1.821(14) |
| S(20)-C(171) | 1.807(16) |
| S(21)-C(191) | 1.770(14) |
| S(22)-C(181) | 1.776(14) |
| S(23)-C(201) | 1.779(13) |
| S(24)-C(230) | 1.758(15) |
| S(25)-C(221) | 1.777(16) |
| S(26)-C(211) | 1.800(16) |
| C(1)-C(2)    | 1.422(19) |
| C(1)-C(6)    | 1.354(19) |
| C(2)-H(2)    | 0.9300    |
| C(2)-C(3)    | 1.40(2)   |
| C(3)-H(3)    | 0.9300    |
| C(3)-C(4)    | 1.36(2)   |
| C(4)-C(5)    | 1.36(2)   |
| C(4)-C(7)    | 1.60(2)   |
| C(5)-H(5)    | 0.9300    |
| C(5)-C(6)    | 1.40(2)   |
| C(6)-H(6)    | 0.9300    |
| C(7)-C(8)    | 1.47(2)   |
| C(7)-C(9)    | 1.46(3)   |
| C(7)-C(10)   | 1.53(3)   |
| C(8)-H(8A)   | 0.9600    |
| C(8)-H(8B)   | 0.9600    |
| C(8)-H(8C)   | 0.9600    |
| C(9)-H(9A)   | 0.9600    |
| C(9)-H(9B)   | 0.9600    |
| C(9)-H(9C)   | 0.9600    |
| C(10)-H(10A) | 0.9600    |
| C(10)-H(10B) | 0.9600    |
| C(10)-H(10C) | 0.9600    |
| C(11)-C(12)  | 1.36(2)   |
| C(11)-C(16)  | 1.38(2)   |
| C(12)-H(12)  | 0.9300    |

|              |           |
|--------------|-----------|
| C(12)-C(13)  | 1.39(3)   |
| C(13)-H(13)  | 0.9300    |
| C(13)-C(14)  | 1.38(3)   |
| C(14)-C(15)  | 1.38(2)   |
| C(14)-C(17)  | 1.65(3)   |
| C(15)-H(15)  | 0.9300    |
| C(15)-C(16)  | 1.39(2)   |
| C(16)-H(16)  | 0.9300    |
| C(17)-C(18)  | 1.61(3)   |
| C(17)-C(19)  | 1.44(3)   |
| C(17)-C(20)  | 1.49(4)   |
| C(18)-H(18A) | 0.9600    |
| C(18)-H(18B) | 0.9600    |
| C(18)-H(18C) | 0.9600    |
| C(19)-H(19A) | 0.9600    |
| C(19)-H(19B) | 0.9600    |
| C(19)-H(19C) | 0.9600    |
| C(20)-H(20A) | 0.9600    |
| C(20)-H(20B) | 0.9600    |
| C(20)-H(20C) | 0.9600    |
| C(21)-C(22)  | 1.39(2)   |
| C(21)-C(26)  | 1.40(3)   |
| C(22)-H(22)  | 0.9300    |
| C(22)-C(23)  | 1.42(3)   |
| C(23)-H(23)  | 0.9300    |
| C(23)-C(24)  | 1.37(4)   |
| C(24)-C(25)  | 1.37(4)   |
| C(24)-C(27)  | 1.533(14) |
| C(25)-H(25)  | 0.9300    |
| C(25)-C(26)  | 1.43(3)   |
| C(26)-H(26)  | 0.9300    |
| C(27)-C(28)  | 1.521(14) |
| C(27)-C(29)  | 1.523(13) |
| C(27)-C(30)  | 1.514(14) |
| C(28)-H(28A) | 0.9600    |
| C(28)-H(28B) | 0.9600    |
| C(28)-H(28C) | 0.9600    |
| C(29)-H(29A) | 0.9600    |

|              |           |
|--------------|-----------|
| C(29)-H(29B) | 0.9600    |
| C(29)-H(29C) | 0.9600    |
| C(30)-H(30A) | 0.9600    |
| C(30)-H(30B) | 0.9600    |
| C(30)-H(30C) | 0.9600    |
| C(31)-C(32)  | 1.375(19) |
| C(31)-C(36)  | 1.40(2)   |
| C(32)-H(32)  | 0.9300    |
| C(32)-C(33)  | 1.40(2)   |
| C(33)-H(33)  | 0.9300    |
| C(33)-C(34)  | 1.38(2)   |
| C(34)-C(35)  | 1.41(2)   |
| C(34)-C(37)  | 1.51(2)   |
| C(35)-H(35)  | 0.9300    |
| C(35)-C(36)  | 1.39(2)   |
| C(36)-H(36)  | 0.9300    |
| C(37)-C(38)  | 1.54(2)   |
| C(37)-C(39)  | 1.55(2)   |
| C(37)-C(40)  | 1.51(2)   |
| C(38)-H(38A) | 0.9600    |
| C(38)-H(38B) | 0.9600    |
| C(38)-H(38C) | 0.9600    |
| C(39)-H(39A) | 0.9600    |
| C(39)-H(39B) | 0.9600    |
| C(39)-H(39C) | 0.9600    |
| C(40)-H(40A) | 0.9600    |
| C(40)-H(40B) | 0.9600    |
| C(40)-H(40C) | 0.9600    |
| C(41)-C(42)  | 1.34(2)   |
| C(41)-C(46)  | 1.41(2)   |
| C(42)-H(42)  | 0.9300    |
| C(42)-C(43)  | 1.42(2)   |
| C(43)-H(43)  | 0.9300    |
| C(43)-C(44)  | 1.34(2)   |
| C(44)-C(45)  | 1.38(2)   |
| C(44)-C(47)  | 1.54(2)   |
| C(45)-H(45)  | 0.9300    |
| C(45)-C(46)  | 1.36(2)   |

|              |           |
|--------------|-----------|
| C(46)-H(46)  | 0.9300    |
| C(47)-C(48)  | 1.49(3)   |
| C(47)-C(49)  | 1.49(3)   |
| C(47)-C(50)  | 1.48(3)   |
| C(48)-H(48A) | 0.9600    |
| C(48)-H(48B) | 0.9600    |
| C(48)-H(48C) | 0.9600    |
| C(49)-H(49A) | 0.9600    |
| C(49)-H(49B) | 0.9600    |
| C(49)-H(49C) | 0.9600    |
| C(50)-H(50A) | 0.9600    |
| C(50)-H(50B) | 0.9600    |
| C(50)-H(50C) | 0.9600    |
| C(51)-C(52)  | 1.41(2)   |
| C(51)-C(56)  | 1.37(2)   |
| C(52)-H(52)  | 0.9300    |
| C(52)-C(53)  | 1.38(2)   |
| C(53)-H(53)  | 0.9300    |
| C(53)-C(54)  | 1.38(2)   |
| C(54)-C(55)  | 1.35(2)   |
| C(54)-C(57)  | 1.53(3)   |
| C(55)-H(55)  | 0.9300    |
| C(55)-C(56)  | 1.37(2)   |
| C(56)-H(56)  | 0.9300    |
| C(57)-C(58)  | 1.51(3)   |
| C(57)-C(59)  | 1.51(3)   |
| C(57)-C(60)  | 1.52(2)   |
| C(58)-H(58A) | 0.9600    |
| C(58)-H(58B) | 0.9600    |
| C(58)-H(58C) | 0.9600    |
| C(59)-H(59A) | 0.9600    |
| C(59)-H(59B) | 0.9600    |
| C(59)-H(59C) | 0.9600    |
| C(60)-H(60A) | 0.9600    |
| C(60)-H(60B) | 0.9600    |
| C(60)-H(60C) | 0.9600    |
| C(61)-C(62)  | 1.387(19) |
| C(61)-C(66)  | 1.33(2)   |

|              |           |
|--------------|-----------|
| C(62)-H(62)  | 0.9300    |
| C(62)-C(63)  | 1.38(2)   |
| C(63)-H(63)  | 0.9300    |
| C(63)-C(64)  | 1.34(2)   |
| C(64)-C(65)  | 1.46(2)   |
| C(64)-C(67)  | 1.49(2)   |
| C(65)-H(65)  | 0.9300    |
| C(65)-C(66)  | 1.35(2)   |
| C(66)-H(66)  | 0.9300    |
| C(67)-C(68)  | 1.60(2)   |
| C(67)-C(69)  | 1.54(2)   |
| C(67)-C(70)  | 1.48(3)   |
| C(68)-H(68A) | 0.9600    |
| C(68)-H(68B) | 0.9600    |
| C(68)-H(68C) | 0.9600    |
| C(69)-H(69A) | 0.9600    |
| C(69)-H(69B) | 0.9600    |
| C(69)-H(69C) | 0.9600    |
| C(70)-H(70A) | 0.9600    |
| C(70)-H(70B) | 0.9600    |
| C(70)-H(70C) | 0.9600    |
| C(71)-C(72)  | 1.40(2)   |
| C(71)-C(76)  | 1.407(19) |
| C(72)-H(72)  | 0.9300    |
| C(72)-C(73)  | 1.33(2)   |
| C(73)-H(73)  | 0.9300    |
| C(73)-C(74)  | 1.40(2)   |
| C(74)-C(75)  | 1.40(2)   |
| C(74)-C(77)  | 1.513(16) |
| C(75)-H(75)  | 0.9300    |
| C(75)-C(76)  | 1.38(2)   |
| C(76)-H(76)  | 0.9300    |
| C(77)-C(78)  | 1.516(17) |
| C(77)-C(79)  | 1.529(17) |
| C(77)-C(80)  | 1.479(17) |
| C(78)-H(78A) | 0.9600    |
| C(78)-H(78B) | 0.9600    |
| C(78)-H(78C) | 0.9600    |



|              |           |
|--------------|-----------|
| C(79)-H(79A) | 0.9600    |
| C(79)-H(79B) | 0.9600    |
| C(79)-H(79C) | 0.9600    |
| C(80)-H(80A) | 0.9600    |
| C(80)-H(80B) | 0.9600    |
| C(80)-H(80C) | 0.9600    |
| C(81)-C(82)  | 1.42(2)   |
| C(81)-C(86)  | 1.37(2)   |
| C(82)-H(82)  | 0.9300    |
| C(82)-C(83)  | 1.37(2)   |
| C(83)-H(83)  | 0.9300    |
| C(83)-C(84)  | 1.42(2)   |
| C(84)-C(85)  | 1.35(2)   |
| C(84)-C(87)  | 1.56(2)   |
| C(85)-H(85)  | 0.9300    |
| C(85)-C(86)  | 1.445(19) |
| C(86)-H(86)  | 0.9300    |
| C(87)-C(88)  | 1.55(3)   |
| C(87)-C(89)  | 1.55(3)   |
| C(87)-C(90)  | 1.55(3)   |
| C(88)-H(88A) | 0.9600    |
| C(88)-H(88B) | 0.9600    |
| C(88)-H(88C) | 0.9600    |
| C(89)-H(89A) | 0.9600    |
| C(89)-H(89B) | 0.9600    |
| C(89)-H(89C) | 0.9600    |
| C(90)-H(90A) | 0.9600    |
| C(90)-H(90B) | 0.9600    |
| C(90)-H(90C) | 0.9600    |
| C(91)-C(92)  | 1.39(2)   |
| C(91)-C(96)  | 1.37(2)   |
| C(92)-H(92)  | 0.9300    |
| C(92)-C(93)  | 1.41(2)   |
| C(93)-H(93)  | 0.9300    |
| C(93)-C(94)  | 1.35(2)   |
| C(94)-C(95)  | 1.41(2)   |
| C(94)-C(97)  | 1.530(16) |
| C(95)-H(95)  | 0.9300    |

|               |           |
|---------------|-----------|
| C(95)-C(96)   | 1.41(2)   |
| C(96)-H(96)   | 0.9300    |
| C(97)-C(98)   | 1.497(17) |
| C(97)-C(99)   | 1.527(17) |
| C(97)-C(100)  | 1.532(16) |
| C(98)-H(98A)  | 0.9600    |
| C(98)-H(98B)  | 0.9600    |
| C(98)-H(98C)  | 0.9600    |
| C(99)-H(99A)  | 0.9600    |
| C(99)-H(99B)  | 0.9600    |
| C(99)-H(99C)  | 0.9600    |
| C(100)-H(10D) | 0.9600    |
| C(100)-H(10E) | 0.9600    |
| C(100)-H(10F) | 0.9600    |
| C(101)-C(102) | 1.37(2)   |
| C(101)-C(106) | 1.41(2)   |
| C(102)-H(102) | 0.9300    |
| C(102)-C(103) | 1.44(2)   |
| C(103)-H(103) | 0.9300    |
| C(103)-C(104) | 1.37(2)   |
| C(104)-C(105) | 1.39(2)   |
| C(104)-C(107) | 1.53(2)   |
| C(105)-H(105) | 0.9300    |
| C(105)-C(106) | 1.35(2)   |
| C(106)-H(106) | 0.9300    |
| C(107)-C(108) | 1.57(2)   |
| C(107)-C(109) | 1.53(2)   |
| C(107)-C(110) | 1.48(3)   |
| C(108)-H(10G) | 0.9600    |
| C(108)-H(10H) | 0.9600    |
| C(108)-H(10I) | 0.9600    |
| C(109)-H(10J) | 0.9600    |
| C(109)-H(10K) | 0.9600    |
| C(109)-H(10L) | 0.9600    |
| C(110)-H(11A) | 0.9600    |
| C(110)-H(11B) | 0.9600    |
| C(110)-H(11C) | 0.9600    |
| C(111)-C(112) | 1.38(3)   |

|               |         |
|---------------|---------|
| C(111)-C(116) | 1.36(2) |
| C(112)-H(112) | 0.9300  |
| C(112)-C(113) | 1.34(3) |
| C(113)-H(113) | 0.9300  |
| C(113)-C(114) | 1.38(3) |
| C(114)-C(115) | 1.31(3) |
| C(114)-C(117) | 1.49(4) |
| C(115)-H(115) | 0.9300  |
| C(115)-C(116) | 1.49(3) |
| C(116)-H(116) | 0.9300  |
| C(117)-C(118) | 1.47(3) |
| C(117)-C(119) | 1.55(4) |
| C(117)-C(120) | 1.51(4) |
| C(118)-H(11D) | 0.9600  |
| C(118)-H(11E) | 0.9600  |
| C(118)-H(11F) | 0.9600  |
| C(119)-H(11G) | 0.9600  |
| C(119)-H(11H) | 0.9600  |
| C(119)-H(11I) | 0.9600  |
| C(120)-H(12A) | 0.9600  |
| C(120)-H(12B) | 0.9600  |
| C(120)-H(12C) | 0.9600  |
| C(121)-C(122) | 1.33(2) |
| C(121)-C(126) | 1.40(2) |
| C(122)-H(122) | 0.9300  |
| C(122)-C(123) | 1.38(2) |
| C(123)-H(123) | 0.9300  |
| C(123)-C(124) | 1.41(2) |
| C(124)-C(125) | 1.35(2) |
| C(124)-C(127) | 1.57(2) |
| C(125)-H(125) | 0.9300  |
| C(125)-C(126) | 1.39(2) |
| C(126)-H(126) | 0.9300  |
| C(127)-C(128) | 1.60(3) |
| C(127)-C(129) | 1.51(3) |
| C(127)-C(130) | 1.50(2) |
| C(128)-H(12D) | 0.9600  |
| C(128)-H(12E) | 0.9600  |

|               |         |
|---------------|---------|
| C(128)-H(12F) | 0.9600  |
| C(129)-H(12G) | 0.9600  |
| C(129)-H(12H) | 0.9600  |
| C(129)-H(12I) | 0.9600  |
| C(130)-H(13A) | 0.9600  |
| C(130)-H(13B) | 0.9600  |
| C(130)-H(13C) | 0.9600  |
| C(131)-C(132) | 1.40(2) |
| C(131)-C(136) | 1.36(2) |
| C(132)-H(132) | 0.9300  |
| C(132)-C(133) | 1.41(2) |
| C(133)-H(133) | 0.9300  |
| C(133)-C(134) | 1.36(2) |
| C(134)-C(135) | 1.39(2) |
| C(134)-C(137) | 1.56(2) |
| C(135)-H(135) | 0.9300  |
| C(135)-C(136) | 1.39(2) |
| C(136)-H(136) | 0.9300  |
| C(137)-C(138) | 1.51(2) |
| C(137)-C(139) | 1.48(3) |
| C(137)-C(140) | 1.49(3) |
| C(138)-H(13D) | 0.9600  |
| C(138)-H(13E) | 0.9600  |
| C(138)-H(13F) | 0.9600  |
| C(139)-H(13G) | 0.9600  |
| C(139)-H(13H) | 0.9600  |
| C(139)-H(13I) | 0.9600  |
| C(140)-H(14A) | 0.9600  |
| C(140)-H(14B) | 0.9600  |
| C(140)-H(14C) | 0.9600  |
| C(141)-C(142) | 1.42(2) |
| C(141)-C(146) | 1.36(2) |
| C(142)-H(142) | 0.9300  |
| C(142)-C(143) | 1.45(2) |
| C(143)-H(143) | 0.9300  |
| C(143)-C(144) | 1.35(3) |
| C(144)-C(145) | 1.35(2) |
| C(144)-C(147) | 1.60(3) |

|               |           |
|---------------|-----------|
| C(145)-H(145) | 0.9300    |
| C(145)-C(146) | 1.38(3)   |
| C(146)-H(146) | 0.9300    |
| C(147)-C(148) | 1.50(3)   |
| C(147)-C(149) | 1.54(3)   |
| C(147)-C(150) | 1.53(3)   |
| C(148)-H(14D) | 0.9600    |
| C(148)-H(14E) | 0.9600    |
| C(148)-H(14F) | 0.9600    |
| C(149)-H(14G) | 0.9600    |
| C(149)-H(14H) | 0.9600    |
| C(149)-H(14I) | 0.9600    |
| C(150)-H(15A) | 0.9600    |
| C(150)-H(15B) | 0.9600    |
| C(150)-H(15C) | 0.9600    |
| C(151)-C(152) | 1.377(19) |
| C(151)-C(156) | 1.39(2)   |
| C(152)-H(152) | 0.9300    |
| C(152)-C(153) | 1.37(2)   |
| C(153)-H(153) | 0.9300    |
| C(153)-C(154) | 1.41(2)   |
| C(154)-C(155) | 1.42(2)   |
| C(154)-C(157) | 1.51(3)   |
| C(155)-H(155) | 0.9300    |
| C(155)-C(156) | 1.40(2)   |
| C(156)-H(156) | 0.9300    |
| C(157)-C(158) | 1.55(3)   |
| C(157)-C(159) | 1.46(3)   |
| C(157)-C(160) | 1.50(3)   |
| C(158)-H(15D) | 0.9600    |
| C(158)-H(15E) | 0.9600    |
| C(158)-H(15F) | 0.9600    |
| C(159)-H(15G) | 0.9600    |
| C(159)-H(15H) | 0.9600    |
| C(159)-H(15I) | 0.9600    |
| C(160)-H(16A) | 0.9600    |
| C(160)-H(16B) | 0.9600    |
| C(160)-H(16C) | 0.9600    |

|               |           |
|---------------|-----------|
| C(161)-C(162) | 1.40(2)   |
| C(161)-C(166) | 1.379(19) |
| C(162)-H(162) | 0.9300    |
| C(162)-C(163) | 1.41(2)   |
| C(163)-H(163) | 0.9300    |
| C(163)-C(164) | 1.39(2)   |
| C(164)-C(165) | 1.44(2)   |
| C(164)-C(167) | 1.54(2)   |
| C(165)-H(165) | 0.9300    |
| C(165)-C(166) | 1.39(2)   |
| C(166)-H(166) | 0.9300    |
| C(167)-C(168) | 1.54(3)   |
| C(167)-C(169) | 1.57(3)   |
| C(167)-C(170) | 1.51(2)   |
| C(168)-H(16D) | 0.9600    |
| C(168)-H(16E) | 0.9600    |
| C(168)-H(16F) | 0.9600    |
| C(169)-H(16G) | 0.9600    |
| C(169)-H(16H) | 0.9600    |
| C(169)-H(16I) | 0.9600    |
| C(170)-H(17A) | 0.9600    |
| C(170)-H(17B) | 0.9600    |
| C(170)-H(17C) | 0.9600    |
| C(171)-C(172) | 1.38(2)   |
| C(171)-C(176) | 1.39(2)   |
| C(172)-H(172) | 0.9300    |
| C(172)-C(173) | 1.39(2)   |
| C(173)-H(173) | 0.9300    |
| C(173)-C(174) | 1.40(2)   |
| C(174)-C(175) | 1.36(2)   |
| C(174)-C(177) | 1.58(3)   |
| C(175)-H(175) | 0.9300    |
| C(175)-C(176) | 1.39(2)   |
| C(176)-H(176) | 0.9300    |
| C(177)-C(178) | 1.41(3)   |
| C(177)-C(179) | 1.51(3)   |
| C(177)-C(180) | 1.47(3)   |
| C(178)-H(17D) | 0.9600    |

|               |           |
|---------------|-----------|
| C(178)-H(17E) | 0.9600    |
| C(178)-H(17F) | 0.9600    |
| C(179)-H(17G) | 0.9600    |
| C(179)-H(17H) | 0.9600    |
| C(179)-H(17I) | 0.9600    |
| C(180)-H(18D) | 0.9600    |
| C(180)-H(18E) | 0.9600    |
| C(180)-H(18F) | 0.9600    |
| C(181)-C(182) | 1.35(2)   |
| C(181)-C(186) | 1.41(2)   |
| C(182)-H(182) | 0.9300    |
| C(182)-C(183) | 1.38(2)   |
| C(183)-H(183) | 0.9300    |
| C(183)-C(184) | 1.36(2)   |
| C(184)-C(185) | 1.42(2)   |
| C(184)-C(187) | 1.56(2)   |
| C(185)-H(185) | 0.9300    |
| C(185)-C(186) | 1.35(2)   |
| C(186)-H(186) | 0.9300    |
| C(187)-C(188) | 1.52(3)   |
| C(187)-C(189) | 1.54(3)   |
| C(187)-C(190) | 1.57(3)   |
| C(188)-H(18G) | 0.9600    |
| C(188)-H(18H) | 0.9600    |
| C(188)-H(18I) | 0.9600    |
| C(189)-H(18J) | 0.9600    |
| C(189)-H(18K) | 0.9600    |
| C(189)-H(18L) | 0.9600    |
| C(190)-H(19D) | 0.9600    |
| C(190)-H(19E) | 0.9600    |
| C(190)-H(19F) | 0.9600    |
| C(191)-C(192) | 1.37(2)   |
| C(191)-C(196) | 1.370(19) |
| C(192)-H(192) | 0.9300    |
| C(192)-C(193) | 1.40(2)   |
| C(193)-H(193) | 0.9300    |
| C(193)-C(194) | 1.36(2)   |
| C(194)-C(195) | 1.38(3)   |

|               |           |
|---------------|-----------|
| C(194)-C(197) | 1.54(3)   |
| C(195)-H(195) | 0.9300    |
| C(195)-C(196) | 1.40(2)   |
| C(196)-H(196) | 0.9300    |
| C(197)-C(198) | 1.50(3)   |
| C(197)-C(199) | 1.47(3)   |
| C(197)-C(200) | 1.52(3)   |
| C(198)-H(19G) | 0.9600    |
| C(198)-H(19H) | 0.9600    |
| C(198)-H(19I) | 0.9600    |
| C(199)-H(19J) | 0.9600    |
| C(199)-H(19K) | 0.9600    |
| C(199)-H(19L) | 0.9600    |
| C(200)-H(20D) | 0.9600    |
| C(200)-H(20E) | 0.9600    |
| C(200)-H(20F) | 0.9600    |
| C(201)-C(202) | 1.37(2)   |
| C(201)-C(206) | 1.36(2)   |
| C(202)-H(202) | 0.9300    |
| C(202)-C(203) | 1.383(19) |
| C(203)-H(203) | 0.9300    |
| C(203)-C(204) | 1.39(2)   |
| C(204)-C(205) | 1.38(2)   |
| C(204)-C(207) | 1.58(2)   |
| C(205)-H(205) | 0.9300    |
| C(205)-C(206) | 1.391(19) |
| C(206)-H(206) | 0.9300    |
| C(207)-C(208) | 1.51(2)   |
| C(207)-C(209) | 1.52(2)   |
| C(207)-C(210) | 1.54(2)   |
| C(208)-H(20G) | 0.9600    |
| C(208)-H(20H) | 0.9600    |
| C(208)-H(20I) | 0.9600    |
| C(209)-H(20J) | 0.9600    |
| C(209)-H(20K) | 0.9600    |
| C(209)-H(20L) | 0.9600    |
| C(210)-H(21A) | 0.9600    |
| C(210)-H(21B) | 0.9600    |



|               |           |
|---------------|-----------|
| C(210)-H(21C) | 0.9600    |
| C(211)-C(212) | 1.38(2)   |
| C(211)-C(216) | 1.35(2)   |
| C(212)-H(212) | 0.9300    |
| C(212)-C(213) | 1.35(2)   |
| C(213)-H(213) | 0.9300    |
| C(213)-C(214) | 1.39(2)   |
| C(214)-C(215) | 1.39(2)   |
| C(214)-C(217) | 1.58(3)   |
| C(215)-H(215) | 0.9300    |
| C(215)-C(216) | 1.41(2)   |
| C(216)-H(216) | 0.9300    |
| C(217)-C(218) | 1.44(3)   |
| C(217)-C(219) | 1.53(3)   |
| C(217)-C(220) | 1.51(3)   |
| C(218)-H(21D) | 0.9600    |
| C(218)-H(21E) | 0.9600    |
| C(218)-H(21F) | 0.9600    |
| C(219)-H(21G) | 0.9600    |
| C(219)-H(21H) | 0.9600    |
| C(219)-H(21I) | 0.9600    |
| C(220)-H(22A) | 0.9600    |
| C(220)-H(22B) | 0.9600    |
| C(220)-H(22C) | 0.9600    |
| C(221)-C(222) | 1.40(2)   |
| C(221)-C(226) | 1.37(2)   |
| C(222)-H(222) | 0.9300    |
| C(222)-C(223) | 1.38(3)   |
| C(223)-H(223) | 0.9300    |
| C(223)-C(224) | 1.35(3)   |
| C(224)-C(225) | 1.41(3)   |
| C(224)-C(227) | 1.532(13) |
| C(225)-H(225) | 0.9300    |
| C(225)-C(226) | 1.40(3)   |
| C(226)-H(226) | 0.9300    |
| C(227)-C(228) | 1.513(13) |
| C(227)-C(229) | 1.529(14) |
| C(227)-C(260) | 1.515(13) |

|               |           |
|---------------|-----------|
| C(228)-H(22D) | 0.9600    |
| C(228)-H(22E) | 0.9600    |
| C(228)-H(22F) | 0.9600    |
| C(229)-H(22G) | 0.9600    |
| C(229)-H(22H) | 0.9600    |
| C(229)-H(22I) | 0.9600    |
| C(230)-C(231) | 1.43(2)   |
| C(230)-C(235) | 1.402(19) |
| C(231)-H(231) | 0.9300    |
| C(231)-C(232) | 1.34(2)   |
| C(232)-H(232) | 0.9300    |
| C(232)-C(233) | 1.41(2)   |
| C(233)-C(234) | 1.45(2)   |
| C(233)-C(236) | 1.53(3)   |
| C(234)-H(234) | 0.9300    |
| C(234)-C(235) | 1.37(2)   |
| C(235)-H(235) | 0.9300    |
| C(236)-C(237) | 1.59(3)   |
| C(236)-C(238) | 1.46(3)   |
| C(236)-C(239) | 1.50(3)   |
| C(237)-H(23A) | 0.9600    |
| C(237)-H(23B) | 0.9600    |
| C(237)-H(23C) | 0.9600    |
| C(238)-H(23D) | 0.9600    |
| C(238)-H(23E) | 0.9600    |
| C(238)-H(23F) | 0.9600    |
| C(239)-H(23G) | 0.9600    |
| C(239)-H(23H) | 0.9600    |
| C(239)-H(23I) | 0.9600    |
| C(240)-C(241) | 1.39(2)   |
| C(240)-C(245) | 1.41(2)   |
| C(241)-H(241) | 0.9300    |
| C(241)-C(242) | 1.39(2)   |
| C(242)-H(242) | 0.9300    |
| C(242)-C(243) | 1.37(2)   |
| C(243)-C(244) | 1.41(2)   |
| C(243)-C(246) | 1.49(3)   |
| C(244)-H(244) | 0.9300    |

|               |           |
|---------------|-----------|
| C(244)-C(245) | 1.34(3)   |
| C(245)-H(245) | 0.9300    |
| C(246)-C(247) | 1.50(3)   |
| C(246)-C(248) | 1.56(3)   |
| C(246)-C(249) | 1.45(3)   |
| C(247)-H(24A) | 0.9600    |
| C(247)-H(24B) | 0.9600    |
| C(247)-H(24C) | 0.9600    |
| C(248)-H(24D) | 0.9600    |
| C(248)-H(24E) | 0.9600    |
| C(248)-H(24F) | 0.9600    |
| C(249)-H(24G) | 0.9600    |
| C(249)-H(24H) | 0.9600    |
| C(249)-H(24I) | 0.9600    |
| C(250)-C(251) | 1.42(2)   |
| C(250)-C(255) | 1.37(2)   |
| C(251)-H(251) | 0.9300    |
| C(251)-C(252) | 1.353(19) |
| C(252)-H(252) | 0.9300    |
| C(252)-C(253) | 1.41(2)   |
| C(253)-C(254) | 1.33(2)   |
| C(253)-C(256) | 1.56(2)   |
| C(254)-H(254) | 0.9300    |
| C(254)-C(255) | 1.39(2)   |
| C(255)-H(255) | 0.9300    |
| C(256)-C(257) | 1.53(3)   |
| C(256)-C(258) | 1.39(3)   |
| C(256)-C(259) | 1.47(3)   |
| C(257)-H(25A) | 0.9600    |
| C(257)-H(25B) | 0.9600    |
| C(257)-H(25C) | 0.9600    |
| C(258)-H(25D) | 0.9600    |
| C(258)-H(25E) | 0.9600    |
| C(258)-H(25F) | 0.9600    |
| C(259)-H(25G) | 0.9600    |
| C(259)-H(25H) | 0.9600    |
| C(259)-H(25I) | 0.9600    |
| C(260)-H(26A) | 0.9600    |

|                     |            |
|---------------------|------------|
| C(260)-H(26B)       | 0.9600     |
| C(260)-H(26C)       | 0.9600     |
| Au(2)-Au(1)-Au(14)  | 121.70(2)  |
| Au(2)-Au(1)-Au(15)  | 176.35(2)  |
| Au(2)-Au(1)-Au(19)  | 118.36(2)  |
| Au(3)-Au(1)-Au(2)   | 62.34(2)   |
| Au(3)-Au(1)-Au(7)   | 61.095(19) |
| Au(3)-Au(1)-Au(14)  | 59.366(19) |
| Au(3)-Au(1)-Au(15)  | 114.22(2)  |
| Au(3)-Au(1)-Au(19)  | 176.39(2)  |
| Au(3)-Au(1)-Au(20)  | 61.588(19) |
| Au(5)-Au(1)-Au(2)   | 116.81(3)  |
| Au(5)-Au(1)-Au(3)   | 89.89(2)   |
| Au(5)-Au(1)-Au(7)   | 58.25(2)   |
| Au(5)-Au(1)-Au(14)  | 63.251(19) |
| Au(5)-Au(1)-Au(15)  | 61.12(2)   |
| Au(5)-Au(1)-Au(16)  | 119.57(3)  |
| Au(5)-Au(1)-Au(19)  | 86.69(2)   |
| Au(5)-Au(1)-Au(20)  | 124.20(3)  |
| Au(6)-Au(1)-Au(2)   | 80.28(3)   |
| Au(6)-Au(1)-Au(3)   | 118.31(3)  |
| Au(6)-Au(1)-Au(5)   | 64.45(2)   |
| Au(6)-Au(1)-Au(7)   | 57.66(2)   |
| Au(6)-Au(1)-Au(14)  | 127.63(2)  |
| Au(6)-Au(1)-Au(15)  | 100.92(2)  |
| Au(6)-Au(1)-Au(16)  | 119.55(2)  |
| Au(6)-Au(1)-Au(17)  | 112.68(3)  |
| Au(6)-Au(1)-Au(19)  | 59.04(2)   |
| Au(6)-Au(1)-Au(20)  | 170.85(3)  |
| Au(7)-Au(1)-Au(2)   | 58.64(2)   |
| Au(7)-Au(1)-Au(14)  | 91.83(2)   |
| Au(7)-Au(1)-Au(15)  | 119.05(2)  |
| Au(7)-Au(1)-Au(19)  | 115.91(2)  |
| Au(7)-Au(1)-Au(20)  | 122.61(2)  |
| Au(14)-Au(1)-Au(15) | 54.853(18) |
| Au(14)-Au(1)-Au(19) | 119.76(3)  |
| Au(15)-Au(1)-Au(19) | 64.988(19) |

|                     |            |
|---------------------|------------|
| Au(16)-Au(1)-Au(2)  | 123.34(2)  |
| Au(16)-Au(1)-Au(3)  | 121.87(2)  |
| Au(16)-Au(1)-Au(7)  | 176.79(2)  |
| Au(16)-Au(1)-Au(14) | 88.98(2)   |
| Au(16)-Au(1)-Au(15) | 59.11(2)   |
| Au(16)-Au(1)-Au(19) | 61.076(19) |
| Au(16)-Au(1)-Au(20) | 60.421(19) |
| Au(17)-Au(1)-Au(2)  | 62.95(2)   |
| Au(17)-Au(1)-Au(3)  | 92.58(2)   |
| Au(17)-Au(1)-Au(5)  | 176.93(3)  |
| Au(17)-Au(1)-Au(7)  | 121.58(3)  |
| Au(17)-Au(1)-Au(14) | 119.65(2)  |
| Au(17)-Au(1)-Au(15) | 119.30(3)  |
| Au(17)-Au(1)-Au(16) | 60.45(2)   |
| Au(17)-Au(1)-Au(19) | 90.81(2)   |
| Au(17)-Au(1)-Au(20) | 58.723(19) |
| Au(20)-Au(1)-Au(2)  | 92.26(2)   |
| Au(20)-Au(1)-Au(14) | 60.950(18) |
| Au(20)-Au(1)-Au(15) | 86.85(2)   |
| Au(20)-Au(1)-Au(19) | 121.47(2)  |
| Au(1)-Au(2)-Au(3)   | 56.866(19) |
| Au(1)-Au(2)-Au(17)  | 54.581(19) |
| Au(1)-Au(2)-Au(18)  | 71.86(2)   |
| Au(3)-Au(2)-Au(18)  | 128.15(3)  |
| Au(7)-Au(2)-Au(1)   | 59.77(2)   |
| Au(7)-Au(2)-Au(3)   | 59.571(19) |
| Au(7)-Au(2)-Au(17)  | 114.35(3)  |
| Au(7)-Au(2)-Au(18)  | 102.28(2)  |
| Au(10)-Au(2)-Au(1)  | 111.68(3)  |
| Au(10)-Au(2)-Au(3)  | 55.80(2)   |
| Au(10)-Au(2)-Au(7)  | 77.85(2)   |
| Au(10)-Au(2)-Au(11) | 63.05(2)   |
| Au(10)-Au(2)-Au(17) | 126.26(3)  |
| Au(10)-Au(2)-Au(18) | 175.56(3)  |
| Au(11)-Au(2)-Au(1)  | 89.48(3)   |
| Au(11)-Au(2)-Au(3)  | 56.809(19) |
| Au(11)-Au(2)-Au(7)  | 116.11(3)  |
| Au(11)-Au(2)-Au(17) | 65.10(2)   |

|                     |            |
|---------------------|------------|
| Au(11)-Au(2)-Au(18) | 120.31(3)  |
| Au(17)-Au(2)-Au(3)  | 84.53(2)   |
| Au(17)-Au(2)-Au(18) | 57.83(2)   |
| S(3)-Au(2)-Au(1)    | 117.43(10) |
| S(3)-Au(2)-Au(3)    | 172.47(9)  |
| S(3)-Au(2)-Au(7)    | 113.81(9)  |
| S(3)-Au(2)-Au(10)   | 128.32(11) |
| S(3)-Au(2)-Au(11)   | 130.05(9)  |
| S(3)-Au(2)-Au(17)   | 95.81(10)  |
| S(3)-Au(2)-Au(18)   | 47.49(10)  |
| Au(1)-Au(3)-Au(2)   | 60.79(2)   |
| Au(1)-Au(3)-Au(7)   | 60.597(19) |
| Au(1)-Au(3)-Au(9)   | 175.54(3)  |
| Au(1)-Au(3)-Au(12)  | 117.76(2)  |
| Au(1)-Au(3)-Au(14)  | 63.400(19) |
| Au(1)-Au(3)-Au(20)  | 60.517(19) |
| Au(2)-Au(3)-Au(9)   | 115.08(2)  |
| Au(2)-Au(3)-Au(12)  | 117.25(2)  |
| Au(4)-Au(3)-Au(1)   | 93.14(2)   |
| Au(4)-Au(3)-Au(2)   | 122.20(2)  |
| Au(4)-Au(3)-Au(7)   | 64.23(2)   |
| Au(4)-Au(3)-Au(9)   | 87.85(2)   |
| Au(4)-Au(3)-Au(11)  | 172.93(3)  |
| Au(4)-Au(3)-Au(12)  | 120.51(2)  |
| Au(4)-Au(3)-Au(14)  | 59.75(2)   |
| Au(4)-Au(3)-Au(20)  | 121.69(3)  |
| Au(4)-Au(3)-Au(32)  | 59.710(19) |
| Au(7)-Au(3)-Au(2)   | 57.998(18) |
| Au(7)-Au(3)-Au(9)   | 116.19(2)  |
| Au(7)-Au(3)-Au(12)  | 175.25(3)  |
| Au(7)-Au(3)-Au(20)  | 121.05(2)  |
| Au(10)-Au(3)-Au(1)  | 116.63(3)  |
| Au(10)-Au(3)-Au(2)  | 56.92(2)   |
| Au(10)-Au(3)-Au(4)  | 109.76(3)  |
| Au(10)-Au(3)-Au(7)  | 77.57(2)   |
| Au(10)-Au(3)-Au(9)  | 59.00(2)   |
| Au(10)-Au(3)-Au(11) | 63.52(2)   |
| Au(10)-Au(3)-Au(12) | 100.00(2)  |

|                     |            |
|---------------------|------------|
| Au(10)-Au(3)-Au(14) | 169.00(3)  |
| Au(10)-Au(3)-Au(20) | 128.46(3)  |
| Au(10)-Au(3)-Au(32) | 119.11(3)  |
| Au(11)-Au(3)-Au(1)  | 92.06(2)   |
| Au(11)-Au(3)-Au(2)  | 56.874(19) |
| Au(11)-Au(3)-Au(7)  | 114.61(3)  |
| Au(11)-Au(3)-Au(9)  | 86.60(2)   |
| Au(11)-Au(3)-Au(12) | 60.67(2)   |
| Au(11)-Au(3)-Au(14) | 127.09(3)  |
| Au(11)-Au(3)-Au(20) | 65.17(2)   |
| Au(11)-Au(3)-Au(32) | 120.69(2)  |
| Au(12)-Au(3)-Au(9)  | 65.165(19) |
| Au(14)-Au(3)-Au(2)  | 124.19(2)  |
| Au(14)-Au(3)-Au(7)  | 93.89(2)   |
| Au(14)-Au(3)-Au(9)  | 120.67(2)  |
| Au(14)-Au(3)-Au(12) | 89.00(2)   |
| Au(14)-Au(3)-Au(20) | 61.94(2)   |
| Au(20)-Au(3)-Au(2)  | 90.78(2)   |
| Au(20)-Au(3)-Au(9)  | 122.43(2)  |
| Au(20)-Au(3)-Au(12) | 57.282(18) |
| Au(32)-Au(3)-Au(1)  | 123.40(3)  |
| Au(32)-Au(3)-Au(2)  | 175.74(3)  |
| Au(32)-Au(3)-Au(7)  | 123.90(2)  |
| Au(32)-Au(3)-Au(9)  | 60.75(2)   |
| Au(32)-Au(3)-Au(12) | 60.842(19) |
| Au(32)-Au(3)-Au(14) | 60.02(2)   |
| Au(32)-Au(3)-Au(20) | 91.05(2)   |
| Au(3)-Au(4)-Au(5)   | 86.43(2)   |
| Au(3)-Au(4)-Au(7)   | 60.814(19) |
| Au(3)-Au(4)-Au(8)   | 77.74(2)   |
| Au(3)-Au(4)-Au(14)  | 63.06(2)   |
| Au(3)-Au(4)-Au(33)  | 138.50(3)  |
| Au(5)-Au(4)-Au(7)   | 54.379(19) |
| Au(5)-Au(4)-Au(33)  | 97.81(2)   |
| Au(7)-Au(4)-Au(33)  | 149.11(2)  |
| Au(8)-Au(4)-Au(5)   | 113.58(3)  |
| Au(8)-Au(4)-Au(7)   | 61.81(2)   |
| Au(8)-Au(4)-Au(33)  | 134.68(3)  |

|                     |            |
|---------------------|------------|
| Au(14)-Au(4)-Au(5)  | 62.592(19) |
| Au(14)-Au(4)-Au(7)  | 93.78(2)   |
| Au(14)-Au(4)-Au(8)  | 140.60(3)  |
| Au(14)-Au(4)-Au(33) | 82.32(2)   |
| Au(32)-Au(4)-Au(3)  | 60.52(2)   |
| Au(32)-Au(4)-Au(5)  | 123.20(3)  |
| Au(32)-Au(4)-Au(7)  | 121.29(2)  |
| Au(32)-Au(4)-Au(8)  | 103.34(3)  |
| Au(32)-Au(4)-Au(14) | 61.42(2)   |
| Au(32)-Au(4)-Au(33) | 83.69(2)   |
| S(11)-Au(4)-Au(3)   | 172.42(10) |
| S(11)-Au(4)-Au(5)   | 92.89(9)   |
| S(11)-Au(4)-Au(7)   | 112.84(9)  |
| S(11)-Au(4)-Au(8)   | 95.67(10)  |
| S(11)-Au(4)-Au(14)  | 123.14(10) |
| S(11)-Au(4)-Au(32)  | 125.44(9)  |
| S(11)-Au(4)-Au(33)  | 49.08(10)  |
| Au(1)-Au(5)-Au(4)   | 90.18(2)   |
| Au(1)-Au(5)-Au(6)   | 57.63(2)   |
| Au(1)-Au(5)-Au(7)   | 64.25(2)   |
| Au(1)-Au(5)-Au(14)  | 63.183(19) |
| Au(1)-Au(5)-Au(15)  | 66.17(2)   |
| Au(4)-Au(5)-Au(14)  | 55.825(18) |
| Au(4)-Au(5)-Au(15)  | 111.56(2)  |
| Au(6)-Au(5)-Au(4)   | 120.02(3)  |
| Au(6)-Au(5)-Au(14)  | 120.75(2)  |
| Au(6)-Au(5)-Au(15)  | 99.94(2)   |
| Au(7)-Au(5)-Au(4)   | 63.19(2)   |
| Au(7)-Au(5)-Au(6)   | 57.45(2)   |
| Au(7)-Au(5)-Au(14)  | 95.08(2)   |
| Au(7)-Au(5)-Au(15)  | 130.02(2)  |
| Au(15)-Au(5)-Au(14) | 56.197(18) |
| S(13)-Au(5)-Au(1)   | 169.33(11) |
| S(13)-Au(5)-Au(4)   | 93.82(9)   |
| S(13)-Au(5)-Au(6)   | 127.46(9)  |
| S(13)-Au(5)-Au(7)   | 126.30(11) |
| S(13)-Au(5)-Au(14)  | 111.34(10) |
| S(13)-Au(5)-Au(15)  | 103.16(11) |



|                     |            |
|---------------------|------------|
| Au(1)-Au(6)-Au(5)   | 57.91(2)   |
| Au(1)-Au(6)-Au(7)   | 64.75(2)   |
| Au(1)-Au(6)-Au(18)  | 74.08(2)   |
| Au(1)-Au(6)-Au(19)  | 68.81(2)   |
| Au(1)-Au(6)-Au(42)  | 124.78(3)  |
| Au(5)-Au(6)-Au(18)  | 131.94(2)  |
| Au(5)-Au(6)-Au(19)  | 88.60(3)   |
| Au(5)-Au(6)-Au(42)  | 133.17(3)  |
| Au(7)-Au(6)-Au(5)   | 58.42(2)   |
| Au(7)-Au(6)-Au(18)  | 104.42(2)  |
| Au(7)-Au(6)-Au(19)  | 132.44(3)  |
| Au(7)-Au(6)-Au(42)  | 80.10(2)   |
| Au(18)-Au(6)-Au(42) | 75.42(2)   |
| Au(19)-Au(6)-Au(18) | 71.27(2)   |
| Au(19)-Au(6)-Au(42) | 138.02(3)  |
| S(26)-Au(6)-Au(1)   | 157.63(10) |
| S(26)-Au(6)-Au(5)   | 144.46(10) |
| S(26)-Au(6)-Au(7)   | 122.00(11) |
| S(26)-Au(6)-Au(18)  | 83.56(10)  |
| S(26)-Au(6)-Au(19)  | 104.88(11) |
| S(26)-Au(6)-Au(42)  | 45.81(11)  |
| Au(1)-Au(7)-Au(3)   | 58.308(19) |
| Au(1)-Au(7)-Au(4)   | 86.36(2)   |
| Au(1)-Au(7)-Au(8)   | 130.90(2)  |
| Au(2)-Au(7)-Au(1)   | 61.60(2)   |
| Au(2)-Au(7)-Au(3)   | 62.43(2)   |
| Au(2)-Au(7)-Au(4)   | 117.35(2)  |
| Au(2)-Au(7)-Au(8)   | 103.62(2)  |
| Au(3)-Au(7)-Au(4)   | 54.951(18) |
| Au(3)-Au(7)-Au(8)   | 73.18(2)   |
| Au(4)-Au(7)-Au(8)   | 57.85(2)   |
| Au(5)-Au(7)-Au(1)   | 57.49(2)   |
| Au(5)-Au(7)-Au(2)   | 119.01(3)  |
| Au(5)-Au(7)-Au(3)   | 87.76(3)   |
| Au(5)-Au(7)-Au(4)   | 62.43(2)   |
| Au(5)-Au(7)-Au(8)   | 117.45(3)  |
| Au(6)-Au(7)-Au(1)   | 57.59(2)   |
| Au(6)-Au(7)-Au(2)   | 81.83(2)   |

|                     |            |
|---------------------|------------|
| Au(6)-Au(7)-Au(3)   | 115.48(3)  |
| Au(6)-Au(7)-Au(4)   | 125.85(3)  |
| Au(6)-Au(7)-Au(5)   | 64.12(2)   |
| Au(6)-Au(7)-Au(8)   | 171.33(3)  |
| S(1)-Au(7)-Au(1)    | 171.86(9)  |
| S(1)-Au(7)-Au(2)    | 110.27(9)  |
| S(1)-Au(7)-Au(3)    | 119.35(8)  |
| S(1)-Au(7)-Au(4)    | 98.40(9)   |
| S(1)-Au(7)-Au(5)    | 130.61(9)  |
| S(1)-Au(7)-Au(6)    | 122.97(9)  |
| S(1)-Au(7)-Au(8)    | 48.98(8)   |
| Au(4)-Au(8)-Au(7)   | 60.35(2)   |
| Au(4)-Au(8)-Au(10)  | 95.95(2)   |
| Au(10)-Au(8)-Au(7)  | 70.50(2)   |
| S(1)-Au(8)-Au(4)    | 102.11(10) |
| S(1)-Au(8)-Au(7)    | 50.80(10)  |
| S(1)-Au(8)-Au(10)   | 92.21(9)   |
| S(2)-Au(8)-Au(4)    | 85.72(11)  |
| S(2)-Au(8)-Au(7)    | 138.36(11) |
| S(2)-Au(8)-Au(10)   | 91.70(10)  |
| S(2)-Au(8)-S(1)     | 170.83(15) |
| Au(3)-Au(9)-Au(12)  | 54.535(17) |
| Au(10)-Au(9)-Au(3)  | 51.418(19) |
| Au(10)-Au(9)-Au(12) | 87.55(2)   |
| Au(10)-Au(9)-Au(32) | 102.98(2)  |
| Au(32)-Au(9)-Au(3)  | 52.031(17) |
| Au(32)-Au(9)-Au(12) | 54.153(18) |
| S(2)-Au(9)-Au(3)    | 97.06(10)  |
| S(2)-Au(9)-Au(10)   | 94.22(10)  |
| S(2)-Au(9)-Au(12)   | 140.57(11) |
| S(2)-Au(9)-Au(32)   | 87.33(11)  |
| S(2)-Au(9)-S(23)    | 173.77(14) |
| S(23)-Au(9)-Au(3)   | 88.37(9)   |
| S(23)-Au(9)-Au(10)  | 86.78(9)   |
| S(23)-Au(9)-Au(12)  | 45.57(10)  |
| S(23)-Au(9)-Au(32)  | 98.45(11)  |
| Au(2)-Au(10)-Au(8)  | 107.59(2)  |
| Au(2)-Au(10)-Au(9)  | 135.55(3)  |

|                      |            |
|----------------------|------------|
| Au(2)-Au(10)-Au(11)  | 58.79(2)   |
| Au(2)-Au(10)-Au(41)  | 74.97(2)   |
| Au(3)-Au(10)-Au(2)   | 67.29(2)   |
| Au(3)-Au(10)-Au(8)   | 76.55(2)   |
| Au(3)-Au(10)-Au(9)   | 69.58(2)   |
| Au(3)-Au(10)-Au(11)  | 59.12(2)   |
| Au(3)-Au(10)-Au(41)  | 128.53(3)  |
| Au(8)-Au(10)-Au(41)  | 83.20(2)   |
| Au(9)-Au(10)-Au(8)   | 71.61(2)   |
| Au(9)-Au(10)-Au(41)  | 144.77(3)  |
| Au(11)-Au(10)-Au(8)  | 135.62(3)  |
| Au(11)-Au(10)-Au(9)  | 89.97(3)   |
| Au(11)-Au(10)-Au(41) | 125.07(3)  |
| S(24)-Au(10)-Au(2)   | 117.50(10) |
| S(24)-Au(10)-Au(3)   | 163.99(10) |
| S(24)-Au(10)-Au(8)   | 87.50(9)   |
| S(24)-Au(10)-Au(9)   | 106.93(10) |
| S(24)-Au(10)-Au(11)  | 136.87(9)  |
| S(24)-Au(10)-Au(41)  | 46.30(9)   |
| Au(2)-Au(11)-Au(10)  | 58.16(2)   |
| Au(2)-Au(11)-Au(12)  | 130.38(3)  |
| Au(2)-Au(11)-Au(17)  | 61.00(2)   |
| Au(2)-Au(11)-Au(20)  | 93.34(2)   |
| Au(2)-Au(11)-Au(26)  | 139.88(2)  |
| Au(3)-Au(11)-Au(2)   | 66.32(2)   |
| Au(3)-Au(11)-Au(10)  | 57.36(2)   |
| Au(3)-Au(11)-Au(12)  | 64.45(2)   |
| Au(3)-Au(11)-Au(17)  | 87.02(2)   |
| Au(3)-Au(11)-Au(20)  | 60.62(2)   |
| Au(3)-Au(11)-Au(26)  | 131.81(3)  |
| Au(10)-Au(11)-Au(12) | 98.57(2)   |
| Au(10)-Au(11)-Au(17) | 117.59(2)  |
| Au(10)-Au(11)-Au(20) | 117.79(2)  |
| Au(10)-Au(11)-Au(26) | 159.65(2)  |
| Au(12)-Au(11)-Au(17) | 110.21(3)  |
| Au(12)-Au(11)-Au(20) | 57.022(19) |
| Au(12)-Au(11)-Au(26) | 75.52(2)   |
| Au(17)-Au(11)-Au(26) | 82.52(2)   |

|                      |            |
|----------------------|------------|
| Au(20)-Au(11)-Au(17) | 53.502(18) |
| Au(20)-Au(11)-Au(26) | 75.76(2)   |
| S(6)-Au(11)-Au(2)    | 120.34(10) |
| S(6)-Au(11)-Au(3)    | 173.34(10) |
| S(6)-Au(11)-Au(10)   | 125.11(11) |
| S(6)-Au(11)-Au(12)   | 108.94(10) |
| S(6)-Au(11)-Au(17)   | 96.33(9)   |
| S(6)-Au(11)-Au(20)   | 117.06(11) |
| S(6)-Au(11)-Au(26)   | 43.52(11)  |
| Au(3)-Au(12)-Au(9)   | 60.300(18) |
| Au(11)-Au(12)-Au(3)  | 54.882(18) |
| Au(11)-Au(12)-Au(9)  | 81.17(2)   |
| Au(11)-Au(12)-Au(28) | 165.26(3)  |
| Au(11)-Au(12)-Au(32) | 109.31(2)  |
| Au(13)-Au(12)-Au(3)  | 90.24(2)   |
| Au(13)-Au(12)-Au(9)  | 121.23(2)  |
| Au(13)-Au(12)-Au(11) | 123.98(2)  |
| Au(13)-Au(12)-Au(20) | 60.423(19) |
| Au(13)-Au(12)-Au(28) | 67.85(2)   |
| Au(13)-Au(12)-Au(32) | 63.99(2)   |
| Au(20)-Au(12)-Au(3)  | 59.978(18) |
| Au(20)-Au(12)-Au(9)  | 120.26(2)  |
| Au(20)-Au(12)-Au(11) | 64.05(2)   |
| Au(20)-Au(12)-Au(28) | 128.25(3)  |
| Au(20)-Au(12)-Au(32) | 89.19(2)   |
| Au(25)-Au(12)-Au(3)  | 119.62(2)  |
| Au(25)-Au(12)-Au(9)  | 178.95(3)  |
| Au(25)-Au(12)-Au(11) | 97.93(2)   |
| Au(25)-Au(12)-Au(13) | 59.73(2)   |
| Au(25)-Au(12)-Au(20) | 59.64(2)   |
| Au(25)-Au(12)-Au(28) | 95.98(3)   |
| Au(25)-Au(12)-Au(32) | 123.52(3)  |
| Au(28)-Au(12)-Au(3)  | 121.02(2)  |
| Au(28)-Au(12)-Au(9)  | 84.86(2)   |
| Au(32)-Au(12)-Au(3)  | 55.090(18) |
| Au(32)-Au(12)-Au(9)  | 57.396(19) |
| Au(32)-Au(12)-Au(28) | 66.219(19) |
| S(23)-Au(12)-Au(3)   | 91.72(9)   |

|                      |            |
|----------------------|------------|
| S(23)-Au(12)-Au(9)   | 43.59(9)   |
| S(23)-Au(12)-Au(11)  | 74.02(9)   |
| S(23)-Au(12)-Au(13)  | 158.02(9)  |
| S(23)-Au(12)-Au(20)  | 137.68(9)  |
| S(23)-Au(12)-Au(25)  | 135.67(9)  |
| S(23)-Au(12)-Au(28)  | 92.57(9)   |
| S(23)-Au(12)-Au(32)  | 99.70(9)   |
| Au(12)-Au(13)-Au(14) | 91.97(2)   |
| Au(12)-Au(13)-Au(20) | 61.13(2)   |
| Au(12)-Au(13)-Au(21) | 123.91(2)  |
| Au(12)-Au(13)-Au(24) | 122.03(2)  |
| Au(12)-Au(13)-Au(28) | 58.988(19) |
| Au(12)-Au(13)-Au(30) | 175.00(2)  |
| Au(12)-Au(13)-Au(32) | 60.43(2)   |
| Au(14)-Au(13)-Au(28) | 118.17(2)  |
| Au(14)-Au(13)-Au(32) | 56.127(17) |
| Au(20)-Au(13)-Au(14) | 62.082(18) |
| Au(20)-Au(13)-Au(21) | 62.87(2)   |
| Au(20)-Au(13)-Au(24) | 92.54(2)   |
| Au(20)-Au(13)-Au(28) | 120.09(3)  |
| Au(20)-Au(13)-Au(30) | 123.86(2)  |
| Au(20)-Au(13)-Au(32) | 87.64(2)   |
| Au(21)-Au(13)-Au(14) | 58.585(18) |
| Au(21)-Au(13)-Au(24) | 63.012(19) |
| Au(21)-Au(13)-Au(28) | 174.74(2)  |
| Au(21)-Au(13)-Au(30) | 61.10(2)   |
| Au(21)-Au(13)-Au(32) | 114.70(2)  |
| Au(24)-Au(13)-Au(14) | 121.59(2)  |
| Au(24)-Au(13)-Au(28) | 120.00(2)  |
| Au(24)-Au(13)-Au(32) | 177.19(2)  |
| Au(25)-Au(13)-Au(12) | 59.64(2)   |
| Au(25)-Au(13)-Au(14) | 121.93(2)  |
| Au(25)-Au(13)-Au(20) | 59.851(19) |
| Au(25)-Au(13)-Au(21) | 94.59(2)   |
| Au(25)-Au(13)-Au(24) | 62.48(2)   |
| Au(25)-Au(13)-Au(28) | 90.67(2)   |
| Au(25)-Au(13)-Au(30) | 121.66(3)  |
| Au(25)-Au(13)-Au(31) | 174.21(3)  |

|                      |            |
|----------------------|------------|
| Au(25)-Au(13)-Au(32) | 119.88(3)  |
| Au(29)-Au(13)-Au(12) | 116.79(3)  |
| Au(29)-Au(13)-Au(14) | 126.48(2)  |
| Au(29)-Au(13)-Au(20) | 171.35(3)  |
| Au(29)-Au(13)-Au(21) | 119.04(3)  |
| Au(29)-Au(13)-Au(24) | 81.62(2)   |
| Au(29)-Au(13)-Au(25) | 111.59(2)  |
| Au(29)-Au(13)-Au(28) | 58.77(2)   |
| Au(29)-Au(13)-Au(30) | 58.23(2)   |
| Au(29)-Au(13)-Au(31) | 62.85(2)   |
| Au(29)-Au(13)-Au(32) | 98.51(2)   |
| Au(30)-Au(13)-Au(14) | 91.05(2)   |
| Au(30)-Au(13)-Au(24) | 59.23(2)   |
| Au(30)-Au(13)-Au(28) | 116.03(2)  |
| Au(30)-Au(13)-Au(32) | 118.46(2)  |
| Au(31)-Au(13)-Au(12) | 120.54(3)  |
| Au(31)-Au(13)-Au(14) | 63.67(2)   |
| Au(31)-Au(13)-Au(20) | 125.74(2)  |
| Au(31)-Au(13)-Au(21) | 89.82(2)   |
| Au(31)-Au(13)-Au(24) | 116.70(3)  |
| Au(31)-Au(13)-Au(28) | 84.95(2)   |
| Au(31)-Au(13)-Au(30) | 57.60(2)   |
| Au(31)-Au(13)-Au(32) | 61.13(2)   |
| Au(32)-Au(13)-Au(28) | 62.140(18) |
| Au(1)-Au(14)-Au(5)   | 53.566(17) |
| Au(1)-Au(14)-Au(31)  | 168.98(2)  |
| Au(3)-Au(14)-Au(1)   | 57.234(19) |
| Au(3)-Au(14)-Au(5)   | 83.04(2)   |
| Au(3)-Au(14)-Au(13)  | 88.73(2)   |
| Au(3)-Au(14)-Au(20)  | 59.729(19) |
| Au(3)-Au(14)-Au(31)  | 117.16(2)  |
| Au(4)-Au(14)-Au(1)   | 87.90(2)   |
| Au(4)-Au(14)-Au(3)   | 57.19(2)   |
| Au(4)-Au(14)-Au(5)   | 61.583(19) |
| Au(4)-Au(14)-Au(13)  | 120.59(2)  |
| Au(4)-Au(14)-Au(15)  | 122.47(2)  |
| Au(4)-Au(14)-Au(20)  | 116.92(3)  |
| Au(4)-Au(14)-Au(21)  | 177.64(3)  |

|                      |            |
|----------------------|------------|
| Au(4)-Au(14)-Au(31)  | 96.51(2)   |
| Au(4)-Au(14)-Au(32)  | 57.942(19) |
| Au(4)-Au(14)-Au(35)  | 124.94(2)  |
| Au(5)-Au(14)-Au(31)  | 137.24(2)  |
| Au(13)-Au(14)-Au(1)  | 114.43(2)  |
| Au(13)-Au(14)-Au(5)  | 167.92(2)  |
| Au(13)-Au(14)-Au(20) | 56.572(18) |
| Au(13)-Au(14)-Au(31) | 54.704(17) |
| Au(15)-Au(14)-Au(1)  | 64.56(2)   |
| Au(15)-Au(14)-Au(3)  | 121.79(2)  |
| Au(15)-Au(14)-Au(5)  | 61.45(2)   |
| Au(15)-Au(14)-Au(13) | 116.77(2)  |
| Au(15)-Au(14)-Au(20) | 90.68(2)   |
| Au(15)-Au(14)-Au(21) | 58.498(19) |
| Au(15)-Au(14)-Au(31) | 120.24(3)  |
| Au(15)-Au(14)-Au(32) | 178.94(3)  |
| Au(20)-Au(14)-Au(1)  | 57.864(17) |
| Au(20)-Au(14)-Au(5)  | 111.43(2)  |
| Au(20)-Au(14)-Au(31) | 111.27(2)  |
| Au(21)-Au(14)-Au(1)  | 90.77(2)   |
| Au(21)-Au(14)-Au(3)  | 120.45(2)  |
| Au(21)-Au(14)-Au(5)  | 118.99(2)  |
| Au(21)-Au(14)-Au(13) | 58.309(18) |
| Au(21)-Au(14)-Au(20) | 60.726(19) |
| Au(21)-Au(14)-Au(31) | 84.46(2)   |
| Au(32)-Au(14)-Au(1)  | 114.66(3)  |
| Au(32)-Au(14)-Au(3)  | 57.447(19) |
| Au(32)-Au(14)-Au(5)  | 118.79(3)  |
| Au(32)-Au(14)-Au(13) | 62.750(19) |
| Au(32)-Au(14)-Au(20) | 88.28(2)   |
| Au(32)-Au(14)-Au(21) | 121.05(2)  |
| Au(32)-Au(14)-Au(31) | 60.38(2)   |
| Au(35)-Au(14)-Au(1)  | 122.62(2)  |
| Au(35)-Au(14)-Au(3)  | 177.75(3)  |
| Au(35)-Au(14)-Au(5)  | 98.63(2)   |
| Au(35)-Au(14)-Au(13) | 89.39(2)   |
| Au(35)-Au(14)-Au(15) | 58.15(2)   |
| Au(35)-Au(14)-Au(20) | 118.13(2)  |

|                      |            |
|----------------------|------------|
| Au(35)-Au(14)-Au(21) | 57.41(2)   |
| Au(35)-Au(14)-Au(31) | 62.55(2)   |
| Au(35)-Au(14)-Au(32) | 122.58(2)  |
| Au(5)-Au(15)-Au(1)   | 52.705(19) |
| Au(5)-Au(15)-Au(37)  | 169.71(2)  |
| Au(14)-Au(15)-Au(1)  | 60.588(19) |
| Au(14)-Au(15)-Au(5)  | 62.349(19) |
| Au(14)-Au(15)-Au(16) | 89.57(2)   |
| Au(14)-Au(15)-Au(37) | 127.03(2)  |
| Au(16)-Au(15)-Au(1)  | 54.215(19) |
| Au(16)-Au(15)-Au(5)  | 106.40(3)  |
| Au(16)-Au(15)-Au(37) | 71.44(2)   |
| Au(21)-Au(15)-Au(1)  | 90.00(2)   |
| Au(21)-Au(15)-Au(5)  | 122.58(2)  |
| Au(21)-Au(15)-Au(14) | 61.266(19) |
| Au(21)-Au(15)-Au(16) | 63.64(2)   |
| Au(21)-Au(15)-Au(37) | 66.03(2)   |
| Au(35)-Au(15)-Au(1)  | 121.29(2)  |
| Au(35)-Au(15)-Au(5)  | 100.97(2)  |
| Au(35)-Au(15)-Au(14) | 60.79(2)   |
| Au(35)-Au(15)-Au(16) | 122.71(2)  |
| Au(35)-Au(15)-Au(21) | 59.172(19) |
| Au(35)-Au(15)-Au(37) | 88.35(3)   |
| Au(37)-Au(15)-Au(1)  | 125.60(2)  |
| S(5)-Au(15)-Au(1)    | 87.47(11)  |
| S(5)-Au(15)-Au(5)    | 70.57(10)  |
| S(5)-Au(15)-Au(14)   | 132.65(10) |
| S(5)-Au(15)-Au(16)   | 99.18(9)   |
| S(5)-Au(15)-Au(21)   | 159.88(9)  |
| S(5)-Au(15)-Au(35)   | 137.52(10) |
| S(5)-Au(15)-Au(37)   | 99.61(10)  |
| Au(1)-Au(16)-Au(15)  | 66.67(2)   |
| Au(1)-Au(16)-Au(19)  | 66.57(2)   |
| Au(1)-Au(16)-Au(20)  | 62.434(19) |
| Au(1)-Au(16)-Au(21)  | 92.84(2)   |
| Au(1)-Au(16)-Au(22)  | 125.55(2)  |
| Au(15)-Au(16)-Au(19) | 69.32(2)   |
| Au(15)-Au(16)-Au(21) | 55.894(18) |



|                      |            |
|----------------------|------------|
| Au(15)-Au(16)-Au(22) | 109.64(3)  |
| Au(17)-Au(16)-Au(1)  | 58.97(2)   |
| Au(17)-Au(16)-Au(15) | 125.34(3)  |
| Au(17)-Au(16)-Au(19) | 93.21(3)   |
| Au(17)-Au(16)-Au(20) | 58.98(2)   |
| Au(17)-Au(16)-Au(21) | 119.70(2)  |
| Au(17)-Au(16)-Au(22) | 97.47(2)   |
| Au(20)-Au(16)-Au(15) | 91.91(2)   |
| Au(20)-Au(16)-Au(19) | 128.97(3)  |
| Au(20)-Au(16)-Au(21) | 60.729(19) |
| Au(20)-Au(16)-Au(22) | 63.487(19) |
| Au(21)-Au(16)-Au(19) | 125.11(2)  |
| Au(22)-Au(16)-Au(19) | 167.04(3)  |
| Au(22)-Au(16)-Au(21) | 54.629(18) |
| S(16)-Au(16)-Au(1)   | 155.81(8)  |
| S(16)-Au(16)-Au(15)  | 95.28(9)   |
| S(16)-Au(16)-Au(17)  | 138.21(10) |
| S(16)-Au(16)-Au(19)  | 92.57(8)   |
| S(16)-Au(16)-Au(20)  | 137.38(9)  |
| S(16)-Au(16)-Au(21)  | 89.47(10)  |
| S(16)-Au(16)-Au(22)  | 74.57(8)   |
| Au(1)-Au(17)-Au(2)   | 62.47(2)   |
| Au(1)-Au(17)-Au(11)  | 87.45(2)   |
| Au(1)-Au(17)-Au(16)  | 60.59(2)   |
| Au(1)-Au(17)-Au(18)  | 77.88(2)   |
| Au(1)-Au(17)-Au(20)  | 64.21(2)   |
| Au(1)-Au(17)-Au(40)  | 138.61(3)  |
| Au(2)-Au(17)-Au(11)  | 53.908(18) |
| Au(2)-Au(17)-Au(40)  | 149.98(3)  |
| Au(16)-Au(17)-Au(2)  | 123.00(2)  |
| Au(16)-Au(17)-Au(11) | 124.48(2)  |
| Au(16)-Au(17)-Au(18) | 101.87(2)  |
| Au(16)-Au(17)-Au(20) | 62.34(2)   |
| Au(16)-Au(17)-Au(40) | 82.59(3)   |
| Au(18)-Au(17)-Au(2)  | 63.42(2)   |
| Au(18)-Au(17)-Au(11) | 114.99(3)  |
| Au(18)-Au(17)-Au(40) | 131.59(2)  |
| Au(20)-Au(17)-Au(2)  | 95.04(2)   |

|                      |            |
|----------------------|------------|
| Au(20)-Au(17)-Au(11) | 63.03(2)   |
| Au(20)-Au(17)-Au(18) | 142.01(3)  |
| Au(20)-Au(17)-Au(40) | 82.97(2)   |
| Au(40)-Au(17)-Au(11) | 99.97(2)   |
| S(22)-Au(17)-Au(1)   | 172.22(11) |
| S(22)-Au(17)-Au(2)   | 110.90(11) |
| S(22)-Au(17)-Au(11)  | 91.53(9)   |
| S(22)-Au(17)-Au(16)  | 125.67(11) |
| S(22)-Au(17)-Au(18)  | 95.62(10)  |
| S(22)-Au(17)-Au(20)  | 121.95(10) |
| S(22)-Au(17)-Au(40)  | 49.15(11)  |
| Au(2)-Au(18)-Au(6)   | 71.34(2)   |
| Au(17)-Au(18)-Au(2)  | 58.758(19) |
| Au(17)-Au(18)-Au(6)  | 95.34(2)   |
| S(3)-Au(18)-Au(2)    | 49.69(9)   |
| S(3)-Au(18)-Au(6)    | 94.78(9)   |
| S(3)-Au(18)-Au(17)   | 98.41(9)   |
| S(4)-Au(18)-Au(2)    | 138.62(10) |
| S(4)-Au(18)-Au(6)    | 88.60(10)  |
| S(4)-Au(18)-Au(17)   | 88.87(10)  |
| S(4)-Au(18)-S(3)     | 171.63(14) |
| Au(6)-Au(19)-Au(1)   | 52.149(18) |
| Au(6)-Au(19)-Au(16)  | 104.08(2)  |
| Au(16)-Au(19)-Au(1)  | 52.352(17) |
| S(4)-Au(19)-Au(1)    | 96.38(10)  |
| S(4)-Au(19)-Au(6)    | 93.92(11)  |
| S(4)-Au(19)-Au(16)   | 87.09(10)  |
| S(5)-Au(19)-Au(1)    | 87.13(9)   |
| S(5)-Au(19)-Au(6)    | 85.81(11)  |
| S(5)-Au(19)-Au(16)   | 97.48(9)   |
| S(5)-Au(19)-S(4)     | 175.35(13) |
| Au(1)-Au(20)-Au(3)   | 57.895(18) |
| Au(1)-Au(20)-Au(11)  | 84.27(2)   |
| Au(1)-Au(20)-Au(14)  | 61.186(18) |
| Au(1)-Au(20)-Au(21)  | 90.64(2)   |
| Au(1)-Au(20)-Au(22)  | 116.61(2)  |
| Au(3)-Au(20)-Au(11)  | 54.207(19) |
| Au(3)-Au(20)-Au(14)  | 58.332(19) |

|                      |            |
|----------------------|------------|
| Au(3)-Au(20)-Au(21)  | 115.48(2)  |
| Au(3)-Au(20)-Au(22)  | 169.22(2)  |
| Au(12)-Au(20)-Au(1)  | 120.60(3)  |
| Au(12)-Au(20)-Au(3)  | 62.741(19) |
| Au(12)-Au(20)-Au(11) | 58.929(19) |
| Au(12)-Au(20)-Au(14) | 90.05(2)   |
| Au(12)-Au(20)-Au(21) | 117.08(2)  |
| Au(12)-Au(20)-Au(22) | 122.24(2)  |
| Au(13)-Au(20)-Au(1)  | 122.52(2)  |
| Au(13)-Au(20)-Au(3)  | 90.75(2)   |
| Au(13)-Au(20)-Au(11) | 116.95(2)  |
| Au(13)-Au(20)-Au(12) | 58.45(2)   |
| Au(13)-Au(20)-Au(14) | 61.346(18) |
| Au(13)-Au(20)-Au(16) | 120.84(3)  |
| Au(13)-Au(20)-Au(21) | 58.714(19) |
| Au(13)-Au(20)-Au(22) | 85.01(2)   |
| Au(14)-Au(20)-Au(11) | 112.52(2)  |
| Au(14)-Au(20)-Au(22) | 111.08(2)  |
| Au(16)-Au(20)-Au(1)  | 57.145(19) |
| Au(16)-Au(20)-Au(3)  | 114.91(2)  |
| Au(16)-Au(20)-Au(11) | 121.33(2)  |
| Au(16)-Au(20)-Au(12) | 177.20(3)  |
| Au(16)-Au(20)-Au(14) | 87.33(2)   |
| Au(16)-Au(20)-Au(21) | 62.124(19) |
| Au(16)-Au(20)-Au(22) | 59.780(19) |
| Au(17)-Au(20)-Au(1)  | 57.066(18) |
| Au(17)-Au(20)-Au(3)  | 89.27(2)   |
| Au(17)-Au(20)-Au(11) | 63.47(2)   |
| Au(17)-Au(20)-Au(12) | 122.01(3)  |
| Au(17)-Au(20)-Au(13) | 179.46(3)  |
| Au(17)-Au(20)-Au(14) | 118.23(2)  |
| Au(17)-Au(20)-Au(16) | 58.69(2)   |
| Au(17)-Au(20)-Au(21) | 120.81(2)  |
| Au(17)-Au(20)-Au(22) | 94.88(2)   |
| Au(17)-Au(20)-Au(25) | 121.81(2)  |
| Au(21)-Au(20)-Au(11) | 169.62(2)  |
| Au(21)-Au(20)-Au(14) | 57.148(18) |
| Au(21)-Au(20)-Au(22) | 53.970(19) |

|                      |            |
|----------------------|------------|
| Au(22)-Au(20)-Au(11) | 136.39(2)  |
| Au(25)-Au(20)-Au(1)  | 178.06(3)  |
| Au(25)-Au(20)-Au(3)  | 121.06(2)  |
| Au(25)-Au(20)-Au(11) | 93.81(2)   |
| Au(25)-Au(20)-Au(12) | 58.322(19) |
| Au(25)-Au(20)-Au(13) | 58.614(19) |
| Au(25)-Au(20)-Au(14) | 119.96(2)  |
| Au(25)-Au(20)-Au(16) | 123.99(3)  |
| Au(25)-Au(20)-Au(21) | 91.29(2)   |
| Au(25)-Au(20)-Au(22) | 64.71(2)   |
| Au(13)-Au(21)-Au(14) | 63.105(19) |
| Au(13)-Au(21)-Au(16) | 115.56(3)  |
| Au(13)-Au(21)-Au(20) | 58.415(18) |
| Au(13)-Au(21)-Au(24) | 60.013(19) |
| Au(13)-Au(21)-Au(30) | 60.19(2)   |
| Au(13)-Au(21)-Au(37) | 175.01(3)  |
| Au(14)-Au(21)-Au(16) | 87.33(2)   |
| Au(14)-Au(21)-Au(20) | 62.13(2)   |
| Au(14)-Au(21)-Au(24) | 123.11(2)  |
| Au(14)-Au(21)-Au(30) | 93.15(2)   |
| Au(14)-Au(21)-Au(37) | 120.93(2)  |
| Au(15)-Au(21)-Au(13) | 123.30(3)  |
| Au(15)-Au(21)-Au(14) | 60.236(19) |
| Au(15)-Au(21)-Au(16) | 60.470(19) |
| Au(15)-Au(21)-Au(20) | 92.51(3)   |
| Au(15)-Au(21)-Au(24) | 176.43(3)  |
| Au(15)-Au(21)-Au(30) | 124.25(2)  |
| Au(15)-Au(21)-Au(37) | 60.933(19) |
| Au(16)-Au(21)-Au(24) | 117.44(2)  |
| Au(16)-Au(21)-Au(37) | 68.44(2)   |
| Au(20)-Au(21)-Au(16) | 57.147(19) |
| Au(20)-Au(21)-Au(24) | 88.39(2)   |
| Au(20)-Au(21)-Au(37) | 125.51(2)  |
| Au(22)-Au(21)-Au(13) | 91.13(2)   |
| Au(22)-Au(21)-Au(14) | 126.79(3)  |
| Au(22)-Au(21)-Au(15) | 121.05(3)  |
| Au(22)-Au(21)-Au(16) | 61.69(2)   |
| Au(22)-Au(21)-Au(20) | 64.71(2)   |

|                      |            |
|----------------------|------------|
| Au(22)-Au(21)-Au(24) | 56.361(19) |
| Au(22)-Au(21)-Au(30) | 114.12(2)  |
| Au(22)-Au(21)-Au(37) | 88.33(2)   |
| Au(23)-Au(21)-Au(13) | 115.53(2)  |
| Au(23)-Au(21)-Au(14) | 168.79(3)  |
| Au(23)-Au(21)-Au(15) | 120.40(3)  |
| Au(23)-Au(21)-Au(16) | 102.70(2)  |
| Au(23)-Au(21)-Au(20) | 127.66(2)  |
| Au(23)-Au(21)-Au(22) | 63.50(2)   |
| Au(23)-Au(21)-Au(24) | 56.62(2)   |
| Au(23)-Au(21)-Au(30) | 77.34(2)   |
| Au(23)-Au(21)-Au(35) | 109.25(3)  |
| Au(23)-Au(21)-Au(37) | 59.89(2)   |
| Au(24)-Au(21)-Au(37) | 115.83(2)  |
| Au(30)-Au(21)-Au(16) | 174.62(2)  |
| Au(30)-Au(21)-Au(20) | 118.51(2)  |
| Au(30)-Au(21)-Au(24) | 57.992(18) |
| Au(30)-Au(21)-Au(37) | 115.62(3)  |
| Au(35)-Au(21)-Au(13) | 94.20(2)   |
| Au(35)-Au(21)-Au(14) | 60.63(2)   |
| Au(35)-Au(21)-Au(15) | 59.81(2)   |
| Au(35)-Au(21)-Au(16) | 120.19(2)  |
| Au(35)-Au(21)-Au(20) | 122.74(3)  |
| Au(35)-Au(21)-Au(22) | 172.45(3)  |
| Au(35)-Au(21)-Au(24) | 122.37(3)  |
| Au(35)-Au(21)-Au(30) | 64.44(2)   |
| Au(35)-Au(21)-Au(37) | 85.90(2)   |
| Au(16)-Au(22)-Au(20) | 56.733(19) |
| Au(16)-Au(22)-Au(25) | 109.92(3)  |
| Au(16)-Au(22)-Au(40) | 76.43(2)   |
| Au(20)-Au(22)-Au(25) | 53.565(18) |
| Au(20)-Au(22)-Au(40) | 75.46(2)   |
| Au(21)-Au(22)-Au(16) | 63.68(2)   |
| Au(21)-Au(22)-Au(20) | 61.32(2)   |
| Au(21)-Au(22)-Au(23) | 57.40(2)   |
| Au(21)-Au(22)-Au(25) | 88.81(2)   |
| Au(21)-Au(22)-Au(40) | 132.21(3)  |
| Au(23)-Au(22)-Au(16) | 100.05(2)  |

|                      |            |
|----------------------|------------|
| Au(23)-Au(22)-Au(20) | 118.26(2)  |
| Au(23)-Au(22)-Au(25) | 117.24(2)  |
| Au(23)-Au(22)-Au(40) | 161.42(3)  |
| Au(24)-Au(22)-Au(16) | 130.12(3)  |
| Au(24)-Au(22)-Au(20) | 92.20(2)   |
| Au(24)-Au(22)-Au(21) | 67.24(2)   |
| Au(24)-Au(22)-Au(23) | 58.37(2)   |
| Au(24)-Au(22)-Au(25) | 60.07(2)   |
| Au(24)-Au(22)-Au(40) | 137.35(3)  |
| Au(25)-Au(22)-Au(40) | 80.71(2)   |
| S(21)-Au(22)-Au(16)  | 111.05(10) |
| S(21)-Au(22)-Au(20)  | 118.95(11) |
| S(21)-Au(22)-Au(21)  | 173.99(9)  |
| S(21)-Au(22)-Au(23)  | 122.79(11) |
| S(21)-Au(22)-Au(24)  | 118.38(9)  |
| S(21)-Au(22)-Au(25)  | 95.95(9)   |
| S(21)-Au(22)-Au(40)  | 45.61(11)  |
| Au(21)-Au(23)-Au(22) | 59.10(2)   |
| Au(21)-Au(23)-Au(24) | 68.04(2)   |
| Au(21)-Au(23)-Au(34) | 77.63(2)   |
| Au(21)-Au(23)-Au(37) | 68.35(2)   |
| Au(21)-Au(23)-Au(39) | 127.51(3)  |
| Au(22)-Au(23)-Au(34) | 136.67(3)  |
| Au(22)-Au(23)-Au(37) | 90.63(3)   |
| Au(22)-Au(23)-Au(39) | 121.76(2)  |
| Au(24)-Au(23)-Au(22) | 58.63(2)   |
| Au(24)-Au(23)-Au(34) | 109.11(3)  |
| Au(24)-Au(23)-Au(37) | 135.35(3)  |
| Au(24)-Au(23)-Au(39) | 71.75(2)   |
| Au(34)-Au(23)-Au(39) | 85.27(2)   |
| Au(37)-Au(23)-Au(34) | 69.94(2)   |
| Au(37)-Au(23)-Au(39) | 147.57(3)  |
| S(19)-Au(23)-Au(21)  | 167.24(10) |
| S(19)-Au(23)-Au(22)  | 132.55(10) |
| S(19)-Au(23)-Au(24)  | 111.84(9)  |
| S(19)-Au(23)-Au(34)  | 90.73(10)  |
| S(19)-Au(23)-Au(37)  | 112.80(9)  |
| S(19)-Au(23)-Au(39)  | 44.93(9)   |

|                      |            |
|----------------------|------------|
| Au(13)-Au(24)-Au(21) | 56.975(18) |
| Au(13)-Au(24)-Au(25) | 55.69(2)   |
| Au(13)-Au(24)-Au(27) | 70.39(2)   |
| Au(21)-Au(24)-Au(27) | 127.16(3)  |
| Au(22)-Au(24)-Au(13) | 89.18(3)   |
| Au(22)-Au(24)-Au(21) | 56.401(19) |
| Au(22)-Au(24)-Au(25) | 66.77(2)   |
| Au(22)-Au(24)-Au(27) | 123.00(3)  |
| Au(22)-Au(24)-Au(30) | 115.26(2)  |
| Au(23)-Au(24)-Au(13) | 111.29(2)  |
| Au(23)-Au(24)-Au(21) | 55.34(2)   |
| Au(23)-Au(24)-Au(22) | 63.00(2)   |
| Au(23)-Au(24)-Au(25) | 128.25(3)  |
| Au(23)-Au(24)-Au(27) | 174.00(3)  |
| Au(23)-Au(24)-Au(30) | 77.30(2)   |
| Au(25)-Au(24)-Au(21) | 86.95(2)   |
| Au(25)-Au(24)-Au(27) | 57.619(19) |
| Au(30)-Au(24)-Au(13) | 59.51(2)   |
| Au(30)-Au(24)-Au(21) | 59.100(19) |
| Au(30)-Au(24)-Au(25) | 115.17(3)  |
| Au(30)-Au(24)-Au(27) | 99.25(2)   |
| S(20)-Au(24)-Au(13)  | 115.32(10) |
| S(20)-Au(24)-Au(21)  | 168.29(9)  |
| S(20)-Au(24)-Au(22)  | 134.89(9)  |
| S(20)-Au(24)-Au(23)  | 129.05(10) |
| S(20)-Au(24)-Au(25)  | 95.36(10)  |
| S(20)-Au(24)-Au(27)  | 47.24(10)  |
| S(20)-Au(24)-Au(30)  | 109.83(9)  |
| Au(12)-Au(25)-Au(13) | 60.63(2)   |
| Au(12)-Au(25)-Au(20) | 62.04(2)   |
| Au(12)-Au(25)-Au(22) | 122.96(2)  |
| Au(12)-Au(25)-Au(24) | 122.38(3)  |
| Au(12)-Au(25)-Au(26) | 83.91(3)   |
| Au(12)-Au(25)-Au(27) | 98.70(2)   |
| Au(13)-Au(25)-Au(20) | 61.53(2)   |
| Au(13)-Au(25)-Au(22) | 84.85(2)   |
| Au(13)-Au(25)-Au(24) | 61.83(2)   |
| Au(13)-Au(25)-Au(26) | 139.52(3)  |

|                      |            |
|----------------------|------------|
| Au(13)-Au(25)-Au(27) | 75.91(2)   |
| Au(20)-Au(25)-Au(22) | 61.727(19) |
| Au(20)-Au(25)-Au(24) | 93.11(2)   |
| Au(20)-Au(25)-Au(26) | 85.71(2)   |
| Au(20)-Au(25)-Au(27) | 137.44(3)  |
| Au(24)-Au(25)-Au(22) | 53.154(18) |
| Au(24)-Au(25)-Au(26) | 149.33(3)  |
| Au(26)-Au(25)-Au(22) | 100.73(2)  |
| Au(27)-Au(25)-Au(22) | 116.21(3)  |
| Au(27)-Au(25)-Au(24) | 64.26(2)   |
| Au(27)-Au(25)-Au(26) | 132.33(2)  |
| S(7)-Au(25)-Au(12)   | 127.48(11) |
| S(7)-Au(25)-Au(13)   | 171.14(11) |
| S(7)-Au(25)-Au(20)   | 123.96(9)  |
| S(7)-Au(25)-Au(22)   | 92.06(9)   |
| S(7)-Au(25)-Au(24)   | 109.78(11) |
| S(7)-Au(25)-Au(26)   | 49.23(11)  |
| S(7)-Au(25)-Au(27)   | 98.18(10)  |
| Au(25)-Au(26)-Au(11) | 84.91(2)   |
| Au(25)-Au(26)-Au(40) | 83.69(2)   |
| Au(40)-Au(26)-Au(11) | 91.73(2)   |
| S(6)-Au(26)-Au(11)   | 45.67(9)   |
| S(6)-Au(26)-Au(25)   | 129.43(10) |
| S(6)-Au(26)-Au(40)   | 104.30(9)  |
| S(6)-Au(26)-S(7)     | 174.09(13) |
| S(7)-Au(26)-Au(11)   | 137.23(9)  |
| S(7)-Au(26)-Au(25)   | 52.47(9)   |
| S(7)-Au(26)-Au(40)   | 81.26(9)   |
| Au(25)-Au(27)-Au(24) | 58.12(2)   |
| Au(25)-Au(27)-Au(29) | 97.35(2)   |
| Au(29)-Au(27)-Au(24) | 73.02(2)   |
| S(8)-Au(27)-Au(24)   | 137.72(9)  |
| S(8)-Au(27)-Au(25)   | 86.94(9)   |
| S(8)-Au(27)-Au(29)   | 90.61(10)  |
| S(8)-Au(27)-S(20)    | 172.91(13) |
| S(20)-Au(27)-Au(24)  | 48.90(9)   |
| S(20)-Au(27)-Au(25)  | 97.14(9)   |
| S(20)-Au(27)-Au(29)  | 94.60(9)   |



|                      |            |
|----------------------|------------|
| Au(12)-Au(28)-Au(13) | 53.162(18) |
| Au(12)-Au(28)-Au(32) | 56.205(17) |
| Au(13)-Au(28)-Au(32) | 56.061(17) |
| Au(29)-Au(28)-Au(12) | 103.90(2)  |
| Au(29)-Au(28)-Au(13) | 51.494(18) |
| Au(29)-Au(28)-Au(32) | 89.29(2)   |
| S(8)-Au(28)-Au(12)   | 83.48(9)   |
| S(8)-Au(28)-Au(13)   | 94.84(9)   |
| S(8)-Au(28)-Au(29)   | 93.23(11)  |
| S(8)-Au(28)-Au(32)   | 138.85(9)  |
| S(9)-Au(28)-Au(12)   | 103.27(10) |
| S(9)-Au(28)-Au(13)   | 89.05(9)   |
| S(9)-Au(28)-Au(29)   | 84.86(11)  |
| S(9)-Au(28)-Au(32)   | 47.73(9)   |
| S(9)-Au(28)-S(8)     | 173.24(14) |
| Au(13)-Au(29)-Au(27) | 75.15(2)   |
| Au(13)-Au(29)-Au(28) | 69.74(2)   |
| Au(13)-Au(29)-Au(30) | 64.68(2)   |
| Au(13)-Au(29)-Au(31) | 60.01(2)   |
| Au(13)-Au(29)-Au(38) | 127.39(3)  |
| Au(27)-Au(29)-Au(38) | 77.42(2)   |
| Au(28)-Au(29)-Au(27) | 72.43(2)   |
| Au(28)-Au(29)-Au(38) | 139.31(3)  |
| Au(30)-Au(29)-Au(27) | 105.33(2)  |
| Au(30)-Au(29)-Au(28) | 133.01(3)  |
| Au(30)-Au(29)-Au(31) | 58.69(2)   |
| Au(30)-Au(29)-Au(38) | 80.91(2)   |
| Au(31)-Au(29)-Au(27) | 135.10(3)  |
| Au(31)-Au(29)-Au(28) | 89.16(3)   |
| Au(31)-Au(29)-Au(38) | 131.49(3)  |
| S(17)-Au(29)-Au(13)  | 161.21(10) |
| S(17)-Au(29)-Au(27)  | 86.25(10)  |
| S(17)-Au(29)-Au(28)  | 102.42(11) |
| S(17)-Au(29)-Au(30)  | 124.49(11) |
| S(17)-Au(29)-Au(31)  | 138.37(10) |
| S(17)-Au(29)-Au(38)  | 48.27(11)  |
| Au(13)-Au(30)-Au(21) | 58.72(2)   |
| Au(13)-Au(30)-Au(34) | 131.00(3)  |

|                      |            |
|----------------------|------------|
| Au(13)-Au(30)-Au(35) | 87.50(2)   |
| Au(21)-Au(30)-Au(34) | 72.56(2)   |
| Au(21)-Au(30)-Au(35) | 54.708(18) |
| Au(24)-Au(30)-Au(13) | 61.26(2)   |
| Au(24)-Au(30)-Au(21) | 62.907(19) |
| Au(24)-Au(30)-Au(34) | 102.19(2)  |
| Au(24)-Au(30)-Au(35) | 117.56(2)  |
| Au(29)-Au(30)-Au(13) | 57.09(2)   |
| Au(29)-Au(30)-Au(21) | 115.54(3)  |
| Au(29)-Au(30)-Au(24) | 82.14(2)   |
| Au(29)-Au(30)-Au(31) | 62.94(2)   |
| Au(29)-Au(30)-Au(34) | 171.89(3)  |
| Au(29)-Au(30)-Au(35) | 125.96(3)  |
| Au(31)-Au(30)-Au(13) | 58.94(2)   |
| Au(31)-Au(30)-Au(21) | 89.16(3)   |
| Au(31)-Au(30)-Au(24) | 120.06(3)  |
| Au(31)-Au(30)-Au(34) | 119.21(2)  |
| Au(31)-Au(30)-Au(35) | 63.89(2)   |
| Au(35)-Au(30)-Au(34) | 58.23(2)   |
| S(12)-Au(30)-Au(13)  | 168.34(9)  |
| S(12)-Au(30)-Au(21)  | 117.08(9)  |
| S(12)-Au(30)-Au(24)  | 107.09(9)  |
| S(12)-Au(30)-Au(29)  | 124.52(9)  |
| S(12)-Au(30)-Au(31)  | 132.70(9)  |
| S(12)-Au(30)-Au(34)  | 47.79(9)   |
| S(12)-Au(30)-Au(35)  | 98.52(9)   |
| Au(13)-Au(31)-Au(14) | 61.629(19) |
| Au(13)-Au(31)-Au(29) | 57.14(2)   |
| Au(13)-Au(31)-Au(32) | 63.80(2)   |
| Au(13)-Au(31)-Au(33) | 130.18(3)  |
| Au(13)-Au(31)-Au(35) | 89.06(2)   |
| Au(14)-Au(31)-Au(33) | 73.31(2)   |
| Au(14)-Au(31)-Au(35) | 55.183(18) |
| Au(29)-Au(31)-Au(14) | 118.73(2)  |
| Au(29)-Au(31)-Au(32) | 96.70(2)   |
| Au(29)-Au(31)-Au(33) | 158.18(3)  |
| Au(29)-Au(31)-Au(35) | 120.18(3)  |
| Au(30)-Au(31)-Au(13) | 63.45(2)   |

|                      |            |
|----------------------|------------|
| Au(30)-Au(31)-Au(14) | 93.09(2)   |
| Au(30)-Au(31)-Au(29) | 58.36(2)   |
| Au(30)-Au(31)-Au(32) | 126.92(3)  |
| Au(30)-Au(31)-Au(33) | 142.59(2)  |
| Au(30)-Au(31)-Au(35) | 62.59(2)   |
| Au(32)-Au(31)-Au(14) | 56.289(19) |
| Au(32)-Au(31)-Au(33) | 74.39(2)   |
| Au(32)-Au(31)-Au(35) | 111.19(2)  |
| Au(35)-Au(31)-Au(33) | 81.61(2)   |
| S(10)-Au(31)-Au(13)  | 173.27(11) |
| S(10)-Au(31)-Au(14)  | 112.19(10) |
| S(10)-Au(31)-Au(29)  | 129.07(10) |
| S(10)-Au(31)-Au(30)  | 121.08(10) |
| S(10)-Au(31)-Au(32)  | 110.98(11) |
| S(10)-Au(31)-Au(33)  | 43.11(10)  |
| S(10)-Au(31)-Au(35)  | 89.09(9)   |
| Au(3)-Au(32)-Au(9)   | 67.22(2)   |
| Au(3)-Au(32)-Au(12)  | 64.067(19) |
| Au(3)-Au(32)-Au(13)  | 90.56(2)   |
| Au(3)-Au(32)-Au(14)  | 62.53(2)   |
| Au(3)-Au(32)-Au(28)  | 121.35(2)  |
| Au(3)-Au(32)-Au(31)  | 125.07(2)  |
| Au(4)-Au(32)-Au(3)   | 59.766(19) |
| Au(4)-Au(32)-Au(9)   | 91.49(3)   |
| Au(4)-Au(32)-Au(12)  | 123.79(3)  |
| Au(4)-Au(32)-Au(13)  | 121.66(2)  |
| Au(4)-Au(32)-Au(14)  | 60.64(2)   |
| Au(4)-Au(32)-Au(28)  | 176.54(3)  |
| Au(4)-Au(32)-Au(31)  | 100.20(2)  |
| Au(9)-Au(32)-Au(28)  | 86.17(2)   |
| Au(12)-Au(32)-Au(9)  | 68.45(2)   |
| Au(12)-Au(32)-Au(13) | 55.583(19) |
| Au(12)-Au(32)-Au(28) | 57.576(18) |
| Au(12)-Au(32)-Au(31) | 109.82(3)  |
| Au(13)-Au(32)-Au(9)  | 123.87(2)  |
| Au(13)-Au(32)-Au(28) | 61.799(18) |
| Au(14)-Au(32)-Au(9)  | 129.63(3)  |
| Au(14)-Au(32)-Au(12) | 92.10(2)   |

|                      |            |
|----------------------|------------|
| Au(14)-Au(32)-Au(13) | 61.123(19) |
| Au(14)-Au(32)-Au(28) | 122.82(3)  |
| Au(14)-Au(32)-Au(31) | 63.33(2)   |
| Au(31)-Au(32)-Au(9)  | 166.29(2)  |
| Au(31)-Au(32)-Au(13) | 55.065(19) |
| Au(31)-Au(32)-Au(28) | 81.82(2)   |
| S(9)-Au(32)-Au(3)    | 161.02(10) |
| S(9)-Au(32)-Au(4)    | 132.43(10) |
| S(9)-Au(32)-Au(9)    | 95.93(11)  |
| S(9)-Au(32)-Au(12)   | 102.44(9)  |
| S(9)-Au(32)-Au(13)   | 92.09(11)  |
| S(9)-Au(32)-Au(14)   | 134.20(11) |
| S(9)-Au(32)-Au(28)   | 45.51(9)   |
| S(9)-Au(32)-Au(31)   | 70.89(11)  |
| Au(4)-Au(33)-Au(31)  | 85.77(2)   |
| Au(4)-Au(33)-Au(36)  | 91.42(2)   |
| Au(36)-Au(33)-Au(31) | 90.67(2)   |
| S(10)-Au(33)-Au(4)   | 130.38(9)  |
| S(10)-Au(33)-Au(31)  | 44.88(9)   |
| S(10)-Au(33)-Au(36)  | 93.53(9)   |
| S(10)-Au(33)-S(11)   | 174.41(13) |
| S(11)-Au(33)-Au(4)   | 51.61(9)   |
| S(11)-Au(33)-Au(31)  | 137.36(9)  |
| S(11)-Au(33)-Au(36)  | 91.59(9)   |
| Au(23)-Au(34)-Au(30) | 70.79(2)   |
| Au(35)-Au(34)-Au(23) | 96.04(3)   |
| Au(35)-Au(34)-Au(30) | 59.77(2)   |
| S(12)-Au(34)-Au(23)  | 90.30(9)   |
| S(12)-Au(34)-Au(30)  | 49.49(11)  |
| S(12)-Au(34)-Au(35)  | 101.34(10) |
| S(12)-Au(34)-S(15)   | 170.17(15) |
| S(15)-Au(34)-Au(23)  | 95.18(10)  |
| S(15)-Au(34)-Au(30)  | 140.22(11) |
| S(15)-Au(34)-Au(35)  | 86.22(11)  |
| Au(14)-Au(35)-Au(30) | 91.86(2)   |
| Au(14)-Au(35)-Au(31) | 62.268(19) |
| Au(14)-Au(35)-Au(34) | 138.73(3)  |
| Au(14)-Au(35)-Au(36) | 87.04(2)   |

|                      |            |
|----------------------|------------|
| Au(15)-Au(35)-Au(14) | 61.07(2)   |
| Au(15)-Au(35)-Au(30) | 121.86(2)  |
| Au(15)-Au(35)-Au(31) | 122.85(3)  |
| Au(15)-Au(35)-Au(34) | 104.28(3)  |
| Au(15)-Au(35)-Au(36) | 80.54(2)   |
| Au(21)-Au(35)-Au(14) | 61.97(2)   |
| Au(21)-Au(35)-Au(15) | 61.01(2)   |
| Au(21)-Au(35)-Au(30) | 60.849(19) |
| Au(21)-Au(35)-Au(31) | 86.56(2)   |
| Au(21)-Au(35)-Au(34) | 77.08(2)   |
| Au(21)-Au(35)-Au(36) | 138.54(3)  |
| Au(30)-Au(35)-Au(31) | 53.513(18) |
| Au(34)-Au(35)-Au(30) | 62.00(2)   |
| Au(34)-Au(35)-Au(31) | 112.96(2)  |
| Au(34)-Au(35)-Au(36) | 130.87(3)  |
| Au(36)-Au(35)-Au(30) | 153.34(2)  |
| Au(36)-Au(35)-Au(31) | 103.48(2)  |
| S(14)-Au(35)-Au(14)  | 127.89(10) |
| S(14)-Au(35)-Au(15)  | 122.92(9)  |
| S(14)-Au(35)-Au(21)  | 170.07(11) |
| S(14)-Au(35)-Au(30)  | 114.37(10) |
| S(14)-Au(35)-Au(31)  | 97.28(9)   |
| S(14)-Au(35)-Au(34)  | 93.00(10)  |
| S(14)-Au(35)-Au(36)  | 49.44(10)  |
| Au(35)-Au(36)-Au(33) | 84.02(2)   |
| S(13)-Au(36)-Au(33)  | 88.75(9)   |
| S(13)-Au(36)-Au(35)  | 127.25(9)  |
| S(13)-Au(36)-S(14)   | 176.67(13) |
| S(14)-Au(36)-Au(33)  | 87.92(9)   |
| S(14)-Au(36)-Au(35)  | 52.47(9)   |
| Au(15)-Au(37)-Au(21) | 53.035(17) |
| Au(23)-Au(37)-Au(15) | 104.49(2)  |
| Au(23)-Au(37)-Au(21) | 51.763(18) |
| S(15)-Au(37)-Au(15)  | 92.09(11)  |
| S(15)-Au(37)-Au(21)  | 100.85(9)  |
| S(15)-Au(37)-Au(23)  | 95.29(10)  |
| S(16)-Au(37)-Au(15)  | 93.92(10)  |
| S(16)-Au(37)-Au(21)  | 86.87(9)   |

|                      |            |
|----------------------|------------|
| S(16)-Au(37)-Au(23)  | 88.17(9)   |
| S(16)-Au(37)-S(15)   | 172.10(13) |
| S(17)-Au(38)-Au(29)  | 48.71(9)   |
| S(18)-Au(38)-Au(29)  | 138.54(11) |
| S(18)-Au(38)-S(17)   | 171.93(14) |
| S(18)-Au(39)-Au(23)  | 140.50(12) |
| S(19)-Au(39)-Au(23)  | 46.16(11)  |
| S(19)-Au(39)-S(18)   | 172.85(17) |
| Au(17)-Au(40)-Au(22) | 86.43(2)   |
| Au(17)-Au(40)-Au(26) | 85.76(2)   |
| Au(26)-Au(40)-Au(22) | 94.87(2)   |
| S(21)-Au(40)-Au(17)  | 132.85(9)  |
| S(21)-Au(40)-Au(22)  | 47.91(9)   |
| S(21)-Au(40)-Au(26)  | 106.22(9)  |
| S(21)-Au(40)-S(22)   | 171.19(13) |
| S(22)-Au(40)-Au(17)  | 50.98(9)   |
| S(22)-Au(40)-Au(22)  | 137.35(9)  |
| S(22)-Au(40)-Au(26)  | 81.32(9)   |
| S(24)-Au(41)-Au(10)  | 47.55(11)  |
| S(25)-Au(41)-Au(10)  | 141.10(13) |
| S(25)-Au(41)-S(24)   | 171.23(17) |
| S(25)-Au(42)-Au(6)   | 139.92(11) |
| S(25)-Au(42)-S(26)   | 172.92(15) |
| S(26)-Au(42)-Au(6)   | 47.05(10)  |
| Au(8)-S(1)-Au(7)     | 80.22(12)  |
| C(250)-S(1)-Au(7)    | 110.3(6)   |
| C(250)-S(1)-Au(8)    | 104.8(5)   |
| Au(9)-S(2)-Au(8)     | 98.43(14)  |
| C(240)-S(2)-Au(8)    | 101.2(5)   |
| C(240)-S(2)-Au(9)    | 107.8(5)   |
| Au(18)-S(3)-Au(2)    | 82.82(14)  |
| C(1)-S(3)-Au(2)      | 108.8(5)   |
| C(1)-S(3)-Au(18)     | 105.9(5)   |
| Au(18)-S(4)-Au(19)   | 100.82(15) |
| C(21)-S(4)-Au(18)    | 101.9(6)   |
| C(21)-S(4)-Au(19)    | 107.5(6)   |
| Au(19)-S(5)-Au(15)   | 92.80(13)  |
| C(11)-S(5)-Au(15)    | 113.3(6)   |

|                     |            |
|---------------------|------------|
| C(11)-S(5)-Au(19)   | 110.0(5)   |
| Au(26)-S(6)-Au(11)  | 90.81(15)  |
| C(31)-S(6)-Au(11)   | 106.3(5)   |
| C(31)-S(6)-Au(26)   | 104.5(5)   |
| Au(26)-S(7)-Au(25)  | 78.30(12)  |
| C(41)-S(7)-Au(25)   | 115.1(5)   |
| C(41)-S(7)-Au(26)   | 104.3(5)   |
| Au(27)-S(8)-Au(28)  | 99.74(14)  |
| C(161)-S(8)-Au(27)  | 106.4(6)   |
| C(161)-S(8)-Au(28)  | 106.1(5)   |
| Au(28)-S(9)-Au(32)  | 86.76(13)  |
| C(51)-S(9)-Au(28)   | 110.8(5)   |
| C(51)-S(9)-Au(32)   | 108.0(5)   |
| Au(33)-S(10)-Au(31) | 92.01(14)  |
| C(71)-S(10)-Au(31)  | 110.9(5)   |
| C(71)-S(10)-Au(33)  | 100.5(5)   |
| Au(33)-S(11)-Au(4)  | 79.31(11)  |
| C(61)-S(11)-Au(4)   | 110.9(5)   |
| C(61)-S(11)-Au(33)  | 108.0(5)   |
| Au(34)-S(12)-Au(30) | 82.72(14)  |
| C(121)-S(12)-Au(30) | 112.9(6)   |
| C(121)-S(12)-Au(34) | 101.4(5)   |
| Au(36)-S(13)-Au(5)  | 97.45(13)  |
| C(81)-S(13)-Au(5)   | 100.9(5)   |
| C(81)-S(13)-Au(36)  | 109.9(6)   |
| Au(36)-S(14)-Au(35) | 78.09(13)  |
| C(91)-S(14)-Au(35)  | 110.7(5)   |
| C(91)-S(14)-Au(36)  | 109.0(5)   |
| Au(34)-S(15)-Au(37) | 94.50(14)  |
| C(111)-S(15)-Au(34) | 104.3(5)   |
| C(111)-S(15)-Au(37) | 107.5(6)   |
| Au(37)-S(16)-Au(16) | 95.09(13)  |
| C(101)-S(16)-Au(16) | 109.3(5)   |
| C(101)-S(16)-Au(37) | 107.4(5)   |
| Au(38)-S(17)-Au(29) | 83.02(12)  |
| C(151)-S(17)-Au(29) | 107.1(5)   |
| C(151)-S(17)-Au(38) | 104.3(5)   |
| Au(38)-S(18)-Au(39) | 113.52(19) |

|                     |           |
|---------------------|-----------|
| C(141)-S(18)-Au(38) | 106.6(5)  |
| C(141)-S(18)-Au(39) | 102.9(5)  |
| Au(39)-S(19)-Au(23) | 88.91(14) |
| C(131)-S(19)-Au(23) | 103.6(5)  |
| C(131)-S(19)-Au(39) | 106.1(4)  |
| Au(27)-S(20)-Au(24) | 83.86(14) |
| C(171)-S(20)-Au(24) | 111.4(5)  |
| C(171)-S(20)-Au(27) | 106.5(6)  |
| Au(40)-S(21)-Au(22) | 86.48(13) |
| C(191)-S(21)-Au(22) | 106.9(5)  |
| C(191)-S(21)-Au(40) | 103.4(6)  |
| Au(40)-S(22)-Au(17) | 79.87(13) |
| C(181)-S(22)-Au(17) | 108.4(5)  |
| C(181)-S(22)-Au(40) | 103.2(6)  |
| Au(9)-S(23)-Au(12)  | 90.84(13) |
| C(201)-S(23)-Au(9)  | 108.9(5)  |
| C(201)-S(23)-Au(12) | 114.2(5)  |
| Au(41)-S(24)-Au(10) | 86.15(14) |
| C(230)-S(24)-Au(10) | 106.3(6)  |
| C(230)-S(24)-Au(41) | 103.5(5)  |
| Au(42)-S(25)-Au(41) | 111.7(2)  |
| C(221)-S(25)-Au(41) | 102.2(5)  |
| C(221)-S(25)-Au(42) | 107.3(5)  |
| Au(42)-S(26)-Au(6)  | 87.15(13) |
| C(211)-S(26)-Au(6)  | 111.5(5)  |
| C(211)-S(26)-Au(42) | 97.3(6)   |
| C(2)-C(1)-S(3)      | 117.9(10) |
| C(6)-C(1)-S(3)      | 124.3(11) |
| C(6)-C(1)-C(2)      | 117.4(13) |
| C(1)-C(2)-H(2)      | 120.2     |
| C(3)-C(2)-C(1)      | 119.5(14) |
| C(3)-C(2)-H(2)      | 120.2     |
| C(2)-C(3)-H(3)      | 119.6     |
| C(4)-C(3)-C(2)      | 120.8(16) |
| C(4)-C(3)-H(3)      | 119.6     |
| C(3)-C(4)-C(7)      | 117.7(15) |
| C(5)-C(4)-C(3)      | 120.1(16) |
| C(5)-C(4)-C(7)      | 122.2(15) |



|                     |           |
|---------------------|-----------|
| C(4)-C(5)-H(5)      | 120.1     |
| C(4)-C(5)-C(6)      | 119.7(15) |
| C(6)-C(5)-H(5)      | 120.1     |
| C(1)-C(6)-C(5)      | 122.0(15) |
| C(1)-C(6)-H(6)      | 119.0     |
| C(5)-C(6)-H(6)      | 119.0     |
| C(8)-C(7)-C(4)      | 110.3(15) |
| C(8)-C(7)-C(10)     | 105.9(19) |
| C(9)-C(7)-C(4)      | 107.8(17) |
| C(9)-C(7)-C(8)      | 109.6(19) |
| C(9)-C(7)-C(10)     | 113(2)    |
| C(10)-C(7)-C(4)     | 110.6(19) |
| C(7)-C(8)-H(8A)     | 109.5     |
| C(7)-C(8)-H(8B)     | 109.5     |
| C(7)-C(8)-H(8C)     | 109.5     |
| H(8A)-C(8)-H(8B)    | 109.5     |
| H(8A)-C(8)-H(8C)    | 109.5     |
| H(8B)-C(8)-H(8C)    | 109.5     |
| C(7)-C(9)-H(9A)     | 109.5     |
| C(7)-C(9)-H(9B)     | 109.5     |
| C(7)-C(9)-H(9C)     | 109.5     |
| H(9A)-C(9)-H(9B)    | 109.5     |
| H(9A)-C(9)-H(9C)    | 109.5     |
| H(9B)-C(9)-H(9C)    | 109.5     |
| C(7)-C(10)-H(10A)   | 109.5     |
| C(7)-C(10)-H(10B)   | 109.5     |
| C(7)-C(10)-H(10C)   | 109.5     |
| H(10A)-C(10)-H(10B) | 109.5     |
| H(10A)-C(10)-H(10C) | 109.5     |
| H(10B)-C(10)-H(10C) | 109.5     |
| C(12)-C(11)-S(5)    | 121.7(14) |
| C(12)-C(11)-C(16)   | 118.7(15) |
| C(16)-C(11)-S(5)    | 119.2(11) |
| C(11)-C(12)-H(12)   | 120.1     |
| C(11)-C(12)-C(13)   | 119.7(19) |
| C(13)-C(12)-H(12)   | 120.1     |
| C(12)-C(13)-H(13)   | 118.8     |
| C(14)-C(13)-C(12)   | 122.3(19) |

|                     |           |
|---------------------|-----------|
| C(14)-C(13)-H(13)   | 118.8     |
| C(13)-C(14)-C(15)   | 117(2)    |
| C(13)-C(14)-C(17)   | 123.4(19) |
| C(15)-C(14)-C(17)   | 119(2)    |
| C(14)-C(15)-H(15)   | 119.8     |
| C(14)-C(15)-C(16)   | 120.3(19) |
| C(16)-C(15)-H(15)   | 119.8     |
| C(11)-C(16)-C(15)   | 121.4(15) |
| C(11)-C(16)-H(16)   | 119.3     |
| C(15)-C(16)-H(16)   | 119.3     |
| C(18)-C(17)-C(14)   | 105(2)    |
| C(19)-C(17)-C(14)   | 108(2)    |
| C(19)-C(17)-C(18)   | 104(2)    |
| C(19)-C(17)-C(20)   | 122(3)    |
| C(20)-C(17)-C(14)   | 117(2)    |
| C(20)-C(17)-C(18)   | 97(3)     |
| C(17)-C(18)-H(18A)  | 109.5     |
| C(17)-C(18)-H(18B)  | 109.5     |
| C(17)-C(18)-H(18C)  | 109.5     |
| H(18A)-C(18)-H(18B) | 109.5     |
| H(18A)-C(18)-H(18C) | 109.5     |
| H(18B)-C(18)-H(18C) | 109.5     |
| C(17)-C(19)-H(19A)  | 109.5     |
| C(17)-C(19)-H(19B)  | 109.5     |
| C(17)-C(19)-H(19C)  | 109.5     |
| H(19A)-C(19)-H(19B) | 109.5     |
| H(19A)-C(19)-H(19C) | 109.5     |
| H(19B)-C(19)-H(19C) | 109.5     |
| C(17)-C(20)-H(20A)  | 109.5     |
| C(17)-C(20)-H(20B)  | 109.5     |
| C(17)-C(20)-H(20C)  | 109.5     |
| H(20A)-C(20)-H(20B) | 109.5     |
| H(20A)-C(20)-H(20C) | 109.5     |
| H(20B)-C(20)-H(20C) | 109.5     |
| C(22)-C(21)-S(4)    | 124.4(15) |
| C(22)-C(21)-C(26)   | 119.8(18) |
| C(26)-C(21)-S(4)    | 115.7(14) |
| C(21)-C(22)-H(22)   | 120.1     |

|                     |           |
|---------------------|-----------|
| C(21)-C(22)-C(23)   | 120(2)    |
| C(23)-C(22)-H(22)   | 120.1     |
| C(22)-C(23)-H(23)   | 120.1     |
| C(24)-C(23)-C(22)   | 120(2)    |
| C(24)-C(23)-H(23)   | 120.1     |
| C(23)-C(24)-C(27)   | 117(3)    |
| C(25)-C(24)-C(23)   | 121(2)    |
| C(25)-C(24)-C(27)   | 122(3)    |
| C(24)-C(25)-H(25)   | 119.9     |
| C(24)-C(25)-C(26)   | 120(2)    |
| C(26)-C(25)-H(25)   | 119.9     |
| C(21)-C(26)-C(25)   | 119(2)    |
| C(21)-C(26)-H(26)   | 120.4     |
| C(25)-C(26)-H(26)   | 120.4     |
| C(28)-C(27)-C(24)   | 114(3)    |
| C(28)-C(27)-C(29)   | 103.2(14) |
| C(29)-C(27)-C(24)   | 115(3)    |
| C(30)-C(27)-C(24)   | 113(3)    |
| C(30)-C(27)-C(28)   | 106.0(15) |
| C(30)-C(27)-C(29)   | 105.5(14) |
| C(27)-C(28)-H(28A)  | 109.5     |
| C(27)-C(28)-H(28B)  | 109.5     |
| C(27)-C(28)-H(28C)  | 109.5     |
| H(28A)-C(28)-H(28B) | 109.5     |
| H(28A)-C(28)-H(28C) | 109.5     |
| H(28B)-C(28)-H(28C) | 109.5     |
| C(27)-C(29)-H(29A)  | 109.5     |
| C(27)-C(29)-H(29B)  | 109.5     |
| C(27)-C(29)-H(29C)  | 109.5     |
| H(29A)-C(29)-H(29B) | 109.5     |
| H(29A)-C(29)-H(29C) | 109.5     |
| H(29B)-C(29)-H(29C) | 109.5     |
| C(27)-C(30)-H(30A)  | 109.5     |
| C(27)-C(30)-H(30B)  | 109.5     |
| C(27)-C(30)-H(30C)  | 109.5     |
| H(30A)-C(30)-H(30B) | 109.5     |
| H(30A)-C(30)-H(30C) | 109.5     |
| H(30B)-C(30)-H(30C) | 109.5     |

|                     |           |
|---------------------|-----------|
| C(32)-C(31)-S(6)    | 121.5(12) |
| C(32)-C(31)-C(36)   | 119.0(13) |
| C(36)-C(31)-S(6)    | 119.5(11) |
| C(31)-C(32)-H(32)   | 120.1     |
| C(31)-C(32)-C(33)   | 119.7(16) |
| C(33)-C(32)-H(32)   | 120.1     |
| C(32)-C(33)-H(33)   | 118.8     |
| C(34)-C(33)-C(32)   | 122.4(15) |
| C(34)-C(33)-H(33)   | 118.8     |
| C(33)-C(34)-C(35)   | 117.6(15) |
| C(33)-C(34)-C(37)   | 124.5(14) |
| C(35)-C(34)-C(37)   | 117.8(15) |
| C(34)-C(35)-H(35)   | 120.0     |
| C(36)-C(35)-C(34)   | 120.1(17) |
| C(36)-C(35)-H(35)   | 120.0     |
| C(31)-C(36)-H(36)   | 119.4     |
| C(35)-C(36)-C(31)   | 121.2(14) |
| C(35)-C(36)-H(36)   | 119.4     |
| C(34)-C(37)-C(38)   | 110.7(14) |
| C(34)-C(37)-C(39)   | 112.9(15) |
| C(38)-C(37)-C(39)   | 106.7(14) |
| C(40)-C(37)-C(34)   | 110.1(15) |
| C(40)-C(37)-C(38)   | 108.6(16) |
| C(40)-C(37)-C(39)   | 107.8(14) |
| C(37)-C(38)-H(38A)  | 109.5     |
| C(37)-C(38)-H(38B)  | 109.5     |
| C(37)-C(38)-H(38C)  | 109.5     |
| H(38A)-C(38)-H(38B) | 109.5     |
| H(38A)-C(38)-H(38C) | 109.5     |
| H(38B)-C(38)-H(38C) | 109.5     |
| C(37)-C(39)-H(39A)  | 109.5     |
| C(37)-C(39)-H(39B)  | 109.5     |
| C(37)-C(39)-H(39C)  | 109.5     |
| H(39A)-C(39)-H(39B) | 109.5     |
| H(39A)-C(39)-H(39C) | 109.5     |
| H(39B)-C(39)-H(39C) | 109.5     |
| C(37)-C(40)-H(40A)  | 109.5     |
| C(37)-C(40)-H(40B)  | 109.5     |

|                     |           |
|---------------------|-----------|
| C(37)-C(40)-H(40C)  | 109.5     |
| H(40A)-C(40)-H(40B) | 109.5     |
| H(40A)-C(40)-H(40C) | 109.5     |
| H(40B)-C(40)-H(40C) | 109.5     |
| C(42)-C(41)-S(7)    | 122.2(12) |
| C(42)-C(41)-C(46)   | 117.4(14) |
| C(46)-C(41)-S(7)    | 120.1(12) |
| C(41)-C(42)-H(42)   | 120.1     |
| C(41)-C(42)-C(43)   | 119.9(16) |
| C(43)-C(42)-H(42)   | 120.1     |
| C(42)-C(43)-H(43)   | 118.8     |
| C(44)-C(43)-C(42)   | 122.4(16) |
| C(44)-C(43)-H(43)   | 118.8     |
| C(43)-C(44)-C(45)   | 117.6(16) |
| C(43)-C(44)-C(47)   | 120.0(16) |
| C(45)-C(44)-C(47)   | 122.2(17) |
| C(44)-C(45)-H(45)   | 119.7     |
| C(46)-C(45)-C(44)   | 120.7(19) |
| C(46)-C(45)-H(45)   | 119.7     |
| C(41)-C(46)-H(46)   | 119.1     |
| C(45)-C(46)-C(41)   | 121.8(17) |
| C(45)-C(46)-H(46)   | 119.1     |
| C(48)-C(47)-C(44)   | 113.8(18) |
| C(48)-C(47)-C(49)   | 107(2)    |
| C(49)-C(47)-C(44)   | 108.3(17) |
| C(50)-C(47)-C(44)   | 109.5(19) |
| C(50)-C(47)-C(48)   | 108(2)    |
| C(50)-C(47)-C(49)   | 110(2)    |
| C(47)-C(48)-H(48A)  | 109.5     |
| C(47)-C(48)-H(48B)  | 109.5     |
| C(47)-C(48)-H(48C)  | 109.5     |
| H(48A)-C(48)-H(48B) | 109.5     |
| H(48A)-C(48)-H(48C) | 109.5     |
| H(48B)-C(48)-H(48C) | 109.5     |
| C(47)-C(49)-H(49A)  | 109.5     |
| C(47)-C(49)-H(49B)  | 109.5     |
| C(47)-C(49)-H(49C)  | 109.5     |
| H(49A)-C(49)-H(49B) | 109.5     |

|                     |           |
|---------------------|-----------|
| H(49A)-C(49)-H(49C) | 109.5     |
| H(49B)-C(49)-H(49C) | 109.5     |
| C(47)-C(50)-H(50A)  | 109.5     |
| C(47)-C(50)-H(50B)  | 109.5     |
| C(47)-C(50)-H(50C)  | 109.5     |
| H(50A)-C(50)-H(50B) | 109.5     |
| H(50A)-C(50)-H(50C) | 109.5     |
| H(50B)-C(50)-H(50C) | 109.5     |
| C(52)-C(51)-S(9)    | 118.2(12) |
| C(56)-C(51)-S(9)    | 126.0(12) |
| C(56)-C(51)-C(52)   | 115.8(15) |
| C(51)-C(52)-H(52)   | 119.4     |
| C(53)-C(52)-C(51)   | 121.1(15) |
| C(53)-C(52)-H(52)   | 119.4     |
| C(52)-C(53)-H(53)   | 119.1     |
| C(52)-C(53)-C(54)   | 121.8(16) |
| C(54)-C(53)-H(53)   | 119.1     |
| C(53)-C(54)-C(57)   | 123.0(15) |
| C(55)-C(54)-C(53)   | 116.8(16) |
| C(55)-C(54)-C(57)   | 120.1(15) |
| C(54)-C(55)-H(55)   | 118.7     |
| C(54)-C(55)-C(56)   | 122.6(17) |
| C(56)-C(55)-H(55)   | 118.7     |
| C(51)-C(56)-H(56)   | 119.0     |
| C(55)-C(56)-C(51)   | 121.9(16) |
| C(55)-C(56)-H(56)   | 119.0     |
| C(58)-C(57)-C(54)   | 111.4(16) |
| C(58)-C(57)-C(59)   | 106.7(18) |
| C(58)-C(57)-C(60)   | 108.4(16) |
| C(59)-C(57)-C(54)   | 111.1(15) |
| C(59)-C(57)-C(60)   | 110.8(16) |
| C(60)-C(57)-C(54)   | 108.5(17) |
| C(57)-C(58)-H(58A)  | 109.5     |
| C(57)-C(58)-H(58B)  | 109.5     |
| C(57)-C(58)-H(58C)  | 109.5     |
| H(58A)-C(58)-H(58B) | 109.5     |
| H(58A)-C(58)-H(58C) | 109.5     |
| H(58B)-C(58)-H(58C) | 109.5     |

|                     |           |
|---------------------|-----------|
| C(57)-C(59)-H(59A)  | 109.5     |
| C(57)-C(59)-H(59B)  | 109.5     |
| C(57)-C(59)-H(59C)  | 109.5     |
| H(59A)-C(59)-H(59B) | 109.5     |
| H(59A)-C(59)-H(59C) | 109.5     |
| H(59B)-C(59)-H(59C) | 109.5     |
| C(57)-C(60)-H(60A)  | 109.5     |
| C(57)-C(60)-H(60B)  | 109.5     |
| C(57)-C(60)-H(60C)  | 109.5     |
| H(60A)-C(60)-H(60B) | 109.5     |
| H(60A)-C(60)-H(60C) | 109.5     |
| H(60B)-C(60)-H(60C) | 109.5     |
| C(62)-C(61)-S(11)   | 121.2(13) |
| C(66)-C(61)-S(11)   | 118.2(12) |
| C(66)-C(61)-C(62)   | 119.7(15) |
| C(61)-C(62)-H(62)   | 120.9     |
| C(63)-C(62)-C(61)   | 118.1(16) |
| C(63)-C(62)-H(62)   | 120.9     |
| C(62)-C(63)-H(63)   | 117.6     |
| C(64)-C(63)-C(62)   | 124.8(15) |
| C(64)-C(63)-H(63)   | 117.6     |
| C(63)-C(64)-C(65)   | 113.5(15) |
| C(63)-C(64)-C(67)   | 126.9(16) |
| C(65)-C(64)-C(67)   | 119.5(16) |
| C(64)-C(65)-H(65)   | 119.4     |
| C(66)-C(65)-C(64)   | 121.2(16) |
| C(66)-C(65)-H(65)   | 119.4     |
| C(61)-C(66)-C(65)   | 122.1(15) |
| C(61)-C(66)-H(66)   | 118.9     |
| C(65)-C(66)-H(66)   | 118.9     |
| C(64)-C(67)-C(68)   | 107.2(14) |
| C(64)-C(67)-C(69)   | 109.8(17) |
| C(69)-C(67)-C(68)   | 104.8(15) |
| C(70)-C(67)-C(64)   | 113.7(16) |
| C(70)-C(67)-C(68)   | 111.2(18) |
| C(70)-C(67)-C(69)   | 109.7(16) |
| C(67)-C(68)-H(68A)  | 109.5     |
| C(67)-C(68)-H(68B)  | 109.5     |

|                     |           |
|---------------------|-----------|
| C(67)-C(68)-H(68C)  | 109.5     |
| H(68A)-C(68)-H(68B) | 109.5     |
| H(68A)-C(68)-H(68C) | 109.5     |
| H(68B)-C(68)-H(68C) | 109.5     |
| C(67)-C(69)-H(69A)  | 109.5     |
| C(67)-C(69)-H(69B)  | 109.5     |
| C(67)-C(69)-H(69C)  | 109.5     |
| H(69A)-C(69)-H(69B) | 109.5     |
| H(69A)-C(69)-H(69C) | 109.5     |
| H(69B)-C(69)-H(69C) | 109.5     |
| C(67)-C(70)-H(70A)  | 109.5     |
| C(67)-C(70)-H(70B)  | 109.5     |
| C(67)-C(70)-H(70C)  | 109.5     |
| H(70A)-C(70)-H(70B) | 109.5     |
| H(70A)-C(70)-H(70C) | 109.5     |
| H(70B)-C(70)-H(70C) | 109.5     |
| C(72)-C(71)-S(10)   | 120.6(11) |
| C(72)-C(71)-C(76)   | 116.3(13) |
| C(76)-C(71)-S(10)   | 122.9(11) |
| C(71)-C(72)-H(72)   | 119.1     |
| C(73)-C(72)-C(71)   | 121.8(16) |
| C(73)-C(72)-H(72)   | 119.1     |
| C(72)-C(73)-H(73)   | 118.4     |
| C(72)-C(73)-C(74)   | 123.1(16) |
| C(74)-C(73)-H(73)   | 118.4     |
| C(73)-C(74)-C(75)   | 116.1(15) |
| C(73)-C(74)-C(77)   | 122.4(16) |
| C(75)-C(74)-C(77)   | 121.1(17) |
| C(74)-C(75)-H(75)   | 119.6     |
| C(76)-C(75)-C(74)   | 120.8(16) |
| C(76)-C(75)-H(75)   | 119.6     |
| C(71)-C(76)-H(76)   | 119.4     |
| C(75)-C(76)-C(71)   | 121.3(15) |
| C(75)-C(76)-H(76)   | 119.4     |
| C(74)-C(77)-C(78)   | 115.7(18) |
| C(74)-C(77)-C(79)   | 109.2(17) |
| C(78)-C(77)-C(79)   | 97.9(17)  |
| C(80)-C(77)-C(74)   | 107.4(17) |



|                     |           |
|---------------------|-----------|
| C(80)-C(77)-C(78)   | 115.5(19) |
| C(80)-C(77)-C(79)   | 111(2)    |
| C(77)-C(78)-H(78A)  | 109.5     |
| C(77)-C(78)-H(78B)  | 109.5     |
| C(77)-C(78)-H(78C)  | 109.5     |
| H(78A)-C(78)-H(78B) | 109.5     |
| H(78A)-C(78)-H(78C) | 109.5     |
| H(78B)-C(78)-H(78C) | 109.5     |
| C(77)-C(79)-H(79A)  | 109.5     |
| C(77)-C(79)-H(79B)  | 109.5     |
| C(77)-C(79)-H(79C)  | 109.5     |
| H(79A)-C(79)-H(79B) | 109.5     |
| H(79A)-C(79)-H(79C) | 109.5     |
| H(79B)-C(79)-H(79C) | 109.5     |
| C(77)-C(80)-H(80A)  | 109.5     |
| C(77)-C(80)-H(80B)  | 109.5     |
| C(77)-C(80)-H(80C)  | 109.5     |
| H(80A)-C(80)-H(80B) | 109.5     |
| H(80A)-C(80)-H(80C) | 109.5     |
| H(80B)-C(80)-H(80C) | 109.5     |
| C(82)-C(81)-S(13)   | 115.2(12) |
| C(86)-C(81)-S(13)   | 123.9(13) |
| C(86)-C(81)-C(82)   | 120.8(14) |
| C(81)-C(82)-H(82)   | 119.7     |
| C(83)-C(82)-C(81)   | 120.6(17) |
| C(83)-C(82)-H(82)   | 119.7     |
| C(82)-C(83)-H(83)   | 120.5     |
| C(82)-C(83)-C(84)   | 118.9(17) |
| C(84)-C(83)-H(83)   | 120.5     |
| C(83)-C(84)-C(87)   | 117.1(17) |
| C(85)-C(84)-C(83)   | 120.5(15) |
| C(85)-C(84)-C(87)   | 122.4(17) |
| C(84)-C(85)-H(85)   | 119.5     |
| C(84)-C(85)-C(86)   | 121.0(16) |
| C(86)-C(85)-H(85)   | 119.5     |
| C(81)-C(86)-C(85)   | 118.0(16) |
| C(81)-C(86)-H(86)   | 121.0     |
| C(85)-C(86)-H(86)   | 121.0     |

|                     |           |
|---------------------|-----------|
| C(88)-C(87)-C(84)   | 111.2(18) |
| C(88)-C(87)-C(89)   | 108.8(19) |
| C(88)-C(87)-C(90)   | 109.2(19) |
| C(89)-C(87)-C(84)   | 107.0(17) |
| C(89)-C(87)-C(90)   | 113(2)    |
| C(90)-C(87)-C(84)   | 107.3(18) |
| C(87)-C(88)-H(88A)  | 109.5     |
| C(87)-C(88)-H(88B)  | 109.5     |
| C(87)-C(88)-H(88C)  | 109.5     |
| H(88A)-C(88)-H(88B) | 109.5     |
| H(88A)-C(88)-H(88C) | 109.5     |
| H(88B)-C(88)-H(88C) | 109.5     |
| C(87)-C(89)-H(89A)  | 109.5     |
| C(87)-C(89)-H(89B)  | 109.5     |
| C(87)-C(89)-H(89C)  | 109.5     |
| H(89A)-C(89)-H(89B) | 109.5     |
| H(89A)-C(89)-H(89C) | 109.5     |
| H(89B)-C(89)-H(89C) | 109.5     |
| C(87)-C(90)-H(90A)  | 109.5     |
| C(87)-C(90)-H(90B)  | 109.5     |
| C(87)-C(90)-H(90C)  | 109.5     |
| H(90A)-C(90)-H(90B) | 109.5     |
| H(90A)-C(90)-H(90C) | 109.5     |
| H(90B)-C(90)-H(90C) | 109.5     |
| C(92)-C(91)-S(14)   | 121.9(13) |
| C(96)-C(91)-S(14)   | 118.1(11) |
| C(96)-C(91)-C(92)   | 119.7(15) |
| C(91)-C(92)-H(92)   | 121.5     |
| C(91)-C(92)-C(93)   | 117.0(17) |
| C(93)-C(92)-H(92)   | 121.5     |
| C(92)-C(93)-H(93)   | 117.4     |
| C(94)-C(93)-C(92)   | 125.2(16) |
| C(94)-C(93)-H(93)   | 117.4     |
| C(93)-C(94)-C(95)   | 117.1(16) |
| C(93)-C(94)-C(97)   | 124.5(16) |
| C(95)-C(94)-C(97)   | 118.4(16) |
| C(94)-C(95)-H(95)   | 120.6     |
| C(94)-C(95)-C(96)   | 118.7(17) |

|                      |           |
|----------------------|-----------|
| C(96)-C(95)-H(95)    | 120.6     |
| C(91)-C(96)-C(95)    | 122.3(15) |
| C(91)-C(96)-H(96)    | 118.9     |
| C(95)-C(96)-H(96)    | 118.9     |
| C(94)-C(97)-C(100)   | 113.2(17) |
| C(98)-C(97)-C(94)    | 110.9(17) |
| C(98)-C(97)-C(99)    | 111(2)    |
| C(98)-C(97)-C(100)   | 105.9(17) |
| C(99)-C(97)-C(94)    | 111.0(17) |
| C(99)-C(97)-C(100)   | 105.0(18) |
| C(97)-C(98)-H(98A)   | 109.5     |
| C(97)-C(98)-H(98B)   | 109.5     |
| C(97)-C(98)-H(98C)   | 109.5     |
| H(98A)-C(98)-H(98B)  | 109.5     |
| H(98A)-C(98)-H(98C)  | 109.5     |
| H(98B)-C(98)-H(98C)  | 109.5     |
| C(97)-C(99)-H(99A)   | 109.5     |
| C(97)-C(99)-H(99B)   | 109.5     |
| C(97)-C(99)-H(99C)   | 109.5     |
| H(99A)-C(99)-H(99B)  | 109.5     |
| H(99A)-C(99)-H(99C)  | 109.5     |
| H(99B)-C(99)-H(99C)  | 109.5     |
| C(97)-C(100)-H(10D)  | 109.5     |
| C(97)-C(100)-H(10E)  | 109.5     |
| C(97)-C(100)-H(10F)  | 109.5     |
| H(10D)-C(100)-H(10E) | 109.5     |
| H(10D)-C(100)-H(10F) | 109.5     |
| H(10E)-C(100)-H(10F) | 109.5     |
| C(102)-C(101)-S(16)  | 120.4(12) |
| C(102)-C(101)-C(106) | 122.3(14) |
| C(106)-C(101)-S(16)  | 117.2(11) |
| C(101)-C(102)-H(102) | 122.2     |
| C(101)-C(102)-C(103) | 115.5(17) |
| C(103)-C(102)-H(102) | 122.2     |
| C(102)-C(103)-H(103) | 118.0     |
| C(104)-C(103)-C(102) | 124.0(18) |
| C(104)-C(103)-H(103) | 118.0     |
| C(103)-C(104)-C(105) | 115.2(16) |

|                      |           |
|----------------------|-----------|
| C(103)-C(104)-C(107) | 119.7(15) |
| C(105)-C(104)-C(107) | 125.0(16) |
| C(104)-C(105)-H(105) | 117.6     |
| C(106)-C(105)-C(104) | 124.8(17) |
| C(106)-C(105)-H(105) | 117.6     |
| C(101)-C(106)-H(106) | 121.0     |
| C(105)-C(106)-C(101) | 118.1(16) |
| C(105)-C(106)-H(106) | 121.0     |
| C(104)-C(107)-C(108) | 108.8(13) |
| C(104)-C(107)-C(109) | 111.1(14) |
| C(109)-C(107)-C(108) | 103.4(16) |
| C(110)-C(107)-C(104) | 109.8(16) |
| C(110)-C(107)-C(108) | 112.3(15) |
| C(110)-C(107)-C(109) | 111.4(15) |
| C(107)-C(108)-H(10G) | 109.5     |
| C(107)-C(108)-H(10H) | 109.5     |
| C(107)-C(108)-H(10I) | 109.5     |
| H(10G)-C(108)-H(10H) | 109.5     |
| H(10G)-C(108)-H(10I) | 109.5     |
| H(10H)-C(108)-H(10I) | 109.5     |
| C(107)-C(109)-H(10J) | 109.5     |
| C(107)-C(109)-H(10K) | 109.5     |
| C(107)-C(109)-H(10L) | 109.5     |
| H(10J)-C(109)-H(10K) | 109.5     |
| H(10J)-C(109)-H(10L) | 109.5     |
| H(10K)-C(109)-H(10L) | 109.5     |
| C(107)-C(110)-H(11A) | 109.5     |
| C(107)-C(110)-H(11B) | 109.5     |
| C(107)-C(110)-H(11C) | 109.5     |
| H(11A)-C(110)-H(11B) | 109.5     |
| H(11A)-C(110)-H(11C) | 109.5     |
| H(11B)-C(110)-H(11C) | 109.5     |
| C(112)-C(111)-S(15)  | 121.0(15) |
| C(116)-C(111)-S(15)  | 114.6(15) |
| C(116)-C(111)-C(112) | 124(2)    |
| C(111)-C(112)-H(112) | 121.9     |
| C(113)-C(112)-C(111) | 116(2)    |
| C(113)-C(112)-H(112) | 121.9     |

|                      |           |
|----------------------|-----------|
| C(112)-C(113)-H(113) | 117.1     |
| C(112)-C(113)-C(114) | 126(3)    |
| C(114)-C(113)-H(113) | 117.1     |
| C(113)-C(114)-C(117) | 124(3)    |
| C(115)-C(114)-C(113) | 116(3)    |
| C(115)-C(114)-C(117) | 119(3)    |
| C(114)-C(115)-H(115) | 118.3     |
| C(114)-C(115)-C(116) | 123(2)    |
| C(116)-C(115)-H(115) | 118.3     |
| C(111)-C(116)-C(115) | 113.9(19) |
| C(111)-C(116)-H(116) | 123.1     |
| C(115)-C(116)-H(116) | 123.1     |
| C(114)-C(117)-C(119) | 111(3)    |
| C(114)-C(117)-C(120) | 107(3)    |
| C(118)-C(117)-C(114) | 118(3)    |
| C(118)-C(117)-C(119) | 115(3)    |
| C(118)-C(117)-C(120) | 106(3)    |
| C(120)-C(117)-C(119) | 97(3)     |
| C(117)-C(118)-H(11D) | 109.5     |
| C(117)-C(118)-H(11E) | 109.5     |
| C(117)-C(118)-H(11F) | 109.5     |
| H(11D)-C(118)-H(11E) | 109.5     |
| H(11D)-C(118)-H(11F) | 109.5     |
| H(11E)-C(118)-H(11F) | 109.5     |
| C(117)-C(119)-H(11G) | 109.5     |
| C(117)-C(119)-H(11H) | 109.5     |
| C(117)-C(119)-H(11I) | 109.5     |
| H(11G)-C(119)-H(11H) | 109.5     |
| H(11G)-C(119)-H(11I) | 109.5     |
| H(11H)-C(119)-H(11I) | 109.5     |
| C(117)-C(120)-H(12A) | 109.5     |
| C(117)-C(120)-H(12B) | 109.5     |
| C(117)-C(120)-H(12C) | 109.5     |
| H(12A)-C(120)-H(12B) | 109.5     |
| H(12A)-C(120)-H(12C) | 109.5     |
| H(12B)-C(120)-H(12C) | 109.5     |
| C(122)-C(121)-S(12)  | 124.6(14) |
| C(122)-C(121)-C(126) | 119.9(15) |

|                      |           |
|----------------------|-----------|
| C(126)-C(121)-S(12)  | 115.4(13) |
| C(121)-C(122)-H(122) | 118.8     |
| C(121)-C(122)-C(123) | 122.5(16) |
| C(123)-C(122)-H(122) | 118.8     |
| C(122)-C(123)-H(123) | 120.4     |
| C(122)-C(123)-C(124) | 119.2(16) |
| C(124)-C(123)-H(123) | 120.4     |
| C(123)-C(124)-C(127) | 123.4(16) |
| C(125)-C(124)-C(123) | 117.4(16) |
| C(125)-C(124)-C(127) | 118.5(17) |
| C(124)-C(125)-H(125) | 118.2     |
| C(124)-C(125)-C(126) | 123.7(18) |
| C(126)-C(125)-H(125) | 118.2     |
| C(121)-C(126)-H(126) | 121.4     |
| C(125)-C(126)-C(121) | 117.3(17) |
| C(125)-C(126)-H(126) | 121.4     |
| C(124)-C(127)-C(128) | 109.0(16) |
| C(129)-C(127)-C(124) | 109.7(15) |
| C(129)-C(127)-C(128) | 108.2(16) |
| C(130)-C(127)-C(124) | 108.5(14) |
| C(130)-C(127)-C(128) | 110.5(17) |
| C(130)-C(127)-C(129) | 110.9(18) |
| C(127)-C(128)-H(12D) | 109.5     |
| C(127)-C(128)-H(12E) | 109.5     |
| C(127)-C(128)-H(12F) | 109.5     |
| H(12D)-C(128)-H(12E) | 109.5     |
| H(12D)-C(128)-H(12F) | 109.5     |
| H(12E)-C(128)-H(12F) | 109.5     |
| C(127)-C(129)-H(12G) | 109.5     |
| C(127)-C(129)-H(12H) | 109.5     |
| C(127)-C(129)-H(12I) | 109.5     |
| H(12G)-C(129)-H(12H) | 109.5     |
| H(12G)-C(129)-H(12I) | 109.5     |
| H(12H)-C(129)-H(12I) | 109.5     |
| C(127)-C(130)-H(13A) | 109.5     |
| C(127)-C(130)-H(13B) | 109.5     |
| C(127)-C(130)-H(13C) | 109.5     |
| H(13A)-C(130)-H(13B) | 109.5     |

|                      |           |
|----------------------|-----------|
| H(13A)-C(130)-H(13C) | 109.5     |
| H(13B)-C(130)-H(13C) | 109.5     |
| C(132)-C(131)-S(19)  | 116.1(11) |
| C(136)-C(131)-S(19)  | 123.5(12) |
| C(136)-C(131)-C(132) | 120.3(14) |
| C(131)-C(132)-H(132) | 121.0     |
| C(131)-C(132)-C(133) | 118.1(16) |
| C(133)-C(132)-H(132) | 121.0     |
| C(132)-C(133)-H(133) | 119.4     |
| C(134)-C(133)-C(132) | 121.2(17) |
| C(134)-C(133)-H(133) | 119.4     |
| C(133)-C(134)-C(135) | 120.0(17) |
| C(133)-C(134)-C(137) | 120.3(17) |
| C(135)-C(134)-C(137) | 119.6(16) |
| C(134)-C(135)-H(135) | 120.5     |
| C(136)-C(135)-C(134) | 118.9(16) |
| C(136)-C(135)-H(135) | 120.5     |
| C(131)-C(136)-C(135) | 121.3(16) |
| C(131)-C(136)-H(136) | 119.3     |
| C(135)-C(136)-H(136) | 119.3     |
| C(138)-C(137)-C(134) | 110.8(14) |
| C(139)-C(137)-C(134) | 111.4(17) |
| C(139)-C(137)-C(138) | 108.9(18) |
| C(139)-C(137)-C(140) | 111.7(18) |
| C(140)-C(137)-C(134) | 106.2(17) |
| C(140)-C(137)-C(138) | 107.8(19) |
| C(137)-C(138)-H(13D) | 109.5     |
| C(137)-C(138)-H(13E) | 109.5     |
| C(137)-C(138)-H(13F) | 109.5     |
| H(13D)-C(138)-H(13E) | 109.5     |
| H(13D)-C(138)-H(13F) | 109.5     |
| H(13E)-C(138)-H(13F) | 109.5     |
| C(137)-C(139)-H(13G) | 109.5     |
| C(137)-C(139)-H(13H) | 109.5     |
| C(137)-C(139)-H(13I) | 109.5     |
| H(13G)-C(139)-H(13H) | 109.5     |
| H(13G)-C(139)-H(13I) | 109.5     |
| H(13H)-C(139)-H(13I) | 109.5     |

|                      |           |
|----------------------|-----------|
| C(137)-C(140)-H(14A) | 109.5     |
| C(137)-C(140)-H(14B) | 109.5     |
| C(137)-C(140)-H(14C) | 109.5     |
| H(14A)-C(140)-H(14B) | 109.5     |
| H(14A)-C(140)-H(14C) | 109.5     |
| H(14B)-C(140)-H(14C) | 109.5     |
| C(142)-C(141)-S(18)  | 118.9(13) |
| C(146)-C(141)-S(18)  | 122.4(13) |
| C(146)-C(141)-C(142) | 118.7(16) |
| C(141)-C(142)-H(142) | 121.3     |
| C(141)-C(142)-C(143) | 117.4(16) |
| C(143)-C(142)-H(142) | 121.3     |
| C(142)-C(143)-H(143) | 119.9     |
| C(144)-C(143)-C(142) | 120.3(16) |
| C(144)-C(143)-H(143) | 119.9     |
| C(143)-C(144)-C(145) | 121(2)    |
| C(143)-C(144)-C(147) | 119.4(16) |
| C(145)-C(144)-C(147) | 119.6(19) |
| C(144)-C(145)-H(145) | 119.7     |
| C(144)-C(145)-C(146) | 121(2)    |
| C(146)-C(145)-H(145) | 119.7     |
| C(141)-C(146)-C(145) | 122.0(19) |
| C(141)-C(146)-H(146) | 119.0     |
| C(145)-C(146)-H(146) | 119.0     |
| C(148)-C(147)-C(144) | 110.4(16) |
| C(148)-C(147)-C(149) | 106.6(17) |
| C(148)-C(147)-C(150) | 111.8(19) |
| C(149)-C(147)-C(144) | 105.8(17) |
| C(150)-C(147)-C(144) | 108.1(17) |
| C(150)-C(147)-C(149) | 113.9(18) |
| C(147)-C(148)-H(14D) | 109.5     |
| C(147)-C(148)-H(14E) | 109.5     |
| C(147)-C(148)-H(14F) | 109.5     |
| H(14D)-C(148)-H(14E) | 109.5     |
| H(14D)-C(148)-H(14F) | 109.5     |
| H(14E)-C(148)-H(14F) | 109.5     |
| C(147)-C(149)-H(14G) | 109.5     |
| C(147)-C(149)-H(14H) | 109.5     |



|                      |           |
|----------------------|-----------|
| C(147)-C(149)-H(14I) | 109.5     |
| H(14G)-C(149)-H(14H) | 109.5     |
| H(14G)-C(149)-H(14I) | 109.5     |
| H(14H)-C(149)-H(14I) | 109.5     |
| C(147)-C(150)-H(15A) | 109.5     |
| C(147)-C(150)-H(15B) | 109.5     |
| C(147)-C(150)-H(15C) | 109.5     |
| H(15A)-C(150)-H(15B) | 109.5     |
| H(15A)-C(150)-H(15C) | 109.5     |
| H(15B)-C(150)-H(15C) | 109.5     |
| C(152)-C(151)-S(17)  | 119.1(11) |
| C(152)-C(151)-C(156) | 118.7(15) |
| C(156)-C(151)-S(17)  | 122.2(11) |
| C(151)-C(152)-H(152) | 119.2     |
| C(153)-C(152)-C(151) | 121.5(15) |
| C(153)-C(152)-H(152) | 119.2     |
| C(152)-C(153)-H(153) | 119.0     |
| C(152)-C(153)-C(154) | 122.1(17) |
| C(154)-C(153)-H(153) | 119.0     |
| C(153)-C(154)-C(155) | 116.1(17) |
| C(153)-C(154)-C(157) | 123.6(17) |
| C(155)-C(154)-C(157) | 120.2(18) |
| C(154)-C(155)-H(155) | 119.8     |
| C(156)-C(155)-C(154) | 120.5(17) |
| C(156)-C(155)-H(155) | 119.8     |
| C(151)-C(156)-C(155) | 120.9(15) |
| C(151)-C(156)-H(156) | 119.6     |
| C(155)-C(156)-H(156) | 119.6     |
| C(154)-C(157)-C(158) | 105.4(18) |
| C(159)-C(157)-C(154) | 113.4(19) |
| C(159)-C(157)-C(158) | 107(2)    |
| C(159)-C(157)-C(160) | 110(2)    |
| C(160)-C(157)-C(154) | 110(2)    |
| C(160)-C(157)-C(158) | 112(2)    |
| C(157)-C(158)-H(15D) | 109.5     |
| C(157)-C(158)-H(15E) | 109.5     |
| C(157)-C(158)-H(15F) | 109.5     |
| H(15D)-C(158)-H(15E) | 109.5     |

|                      |           |
|----------------------|-----------|
| H(15D)-C(158)-H(15F) | 109.5     |
| H(15E)-C(158)-H(15F) | 109.5     |
| C(157)-C(159)-H(15G) | 109.5     |
| C(157)-C(159)-H(15H) | 109.5     |
| C(157)-C(159)-H(15I) | 109.5     |
| H(15G)-C(159)-H(15H) | 109.5     |
| H(15G)-C(159)-H(15I) | 109.5     |
| H(15H)-C(159)-H(15I) | 109.5     |
| C(157)-C(160)-H(16A) | 109.5     |
| C(157)-C(160)-H(16B) | 109.5     |
| C(157)-C(160)-H(16C) | 109.5     |
| H(16A)-C(160)-H(16B) | 109.5     |
| H(16A)-C(160)-H(16C) | 109.5     |
| H(16B)-C(160)-H(16C) | 109.5     |
| C(162)-C(161)-S(8)   | 122.6(11) |
| C(166)-C(161)-S(8)   | 118.2(11) |
| C(166)-C(161)-C(162) | 119.2(13) |
| C(161)-C(162)-H(162) | 120.6     |
| C(161)-C(162)-C(163) | 118.8(15) |
| C(163)-C(162)-H(162) | 120.6     |
| C(162)-C(163)-H(163) | 118.8     |
| C(164)-C(163)-C(162) | 122.5(16) |
| C(164)-C(163)-H(163) | 118.8     |
| C(163)-C(164)-C(165) | 117.6(15) |
| C(163)-C(164)-C(167) | 120.2(15) |
| C(165)-C(164)-C(167) | 122.0(15) |
| C(164)-C(165)-H(165) | 120.6     |
| C(166)-C(165)-C(164) | 118.9(16) |
| C(166)-C(165)-H(165) | 120.6     |
| C(161)-C(166)-C(165) | 122.9(14) |
| C(161)-C(166)-H(166) | 118.6     |
| C(165)-C(166)-H(166) | 118.6     |
| C(164)-C(167)-C(168) | 106.0(15) |
| C(164)-C(167)-C(169) | 108.9(15) |
| C(168)-C(167)-C(169) | 111.8(16) |
| C(170)-C(167)-C(164) | 112.8(14) |
| C(170)-C(167)-C(168) | 109.2(17) |
| C(170)-C(167)-C(169) | 108.2(16) |

|                      |           |
|----------------------|-----------|
| C(167)-C(168)-H(16D) | 109.5     |
| C(167)-C(168)-H(16E) | 109.5     |
| C(167)-C(168)-H(16F) | 109.5     |
| H(16D)-C(168)-H(16E) | 109.5     |
| H(16D)-C(168)-H(16F) | 109.5     |
| H(16E)-C(168)-H(16F) | 109.5     |
| C(167)-C(169)-H(16G) | 109.5     |
| C(167)-C(169)-H(16H) | 109.5     |
| C(167)-C(169)-H(16I) | 109.5     |
| H(16G)-C(169)-H(16H) | 109.5     |
| H(16G)-C(169)-H(16I) | 109.5     |
| H(16H)-C(169)-H(16I) | 109.5     |
| C(167)-C(170)-H(17A) | 109.5     |
| C(167)-C(170)-H(17B) | 109.5     |
| C(167)-C(170)-H(17C) | 109.5     |
| H(17A)-C(170)-H(17B) | 109.5     |
| H(17A)-C(170)-H(17C) | 109.5     |
| H(17B)-C(170)-H(17C) | 109.5     |
| C(172)-C(171)-S(20)  | 116.2(11) |
| C(172)-C(171)-C(176) | 120.6(15) |
| C(176)-C(171)-S(20)  | 122.9(13) |
| C(171)-C(172)-H(172) | 120.6     |
| C(171)-C(172)-C(173) | 118.8(15) |
| C(173)-C(172)-H(172) | 120.6     |
| C(172)-C(173)-H(173) | 118.9     |
| C(172)-C(173)-C(174) | 122.3(17) |
| C(174)-C(173)-H(173) | 118.9     |
| C(173)-C(174)-C(177) | 123.8(16) |
| C(175)-C(174)-C(173) | 115.9(17) |
| C(175)-C(174)-C(177) | 120.1(16) |
| C(174)-C(175)-H(175) | 117.7     |
| C(174)-C(175)-C(176) | 124.5(16) |
| C(176)-C(175)-H(175) | 117.7     |
| C(171)-C(176)-C(175) | 117.8(15) |
| C(171)-C(176)-H(176) | 121.1     |
| C(175)-C(176)-H(176) | 121.1     |
| C(178)-C(177)-C(174) | 116.4(17) |
| C(178)-C(177)-C(179) | 105.4(19) |

|                      |           |
|----------------------|-----------|
| C(178)-C(177)-C(180) | 114(2)    |
| C(179)-C(177)-C(174) | 105.9(18) |
| C(180)-C(177)-C(174) | 107.5(17) |
| C(180)-C(177)-C(179) | 107(2)    |
| C(177)-C(178)-H(17D) | 109.5     |
| C(177)-C(178)-H(17E) | 109.5     |
| C(177)-C(178)-H(17F) | 109.5     |
| H(17D)-C(178)-H(17E) | 109.5     |
| H(17D)-C(178)-H(17F) | 109.5     |
| H(17E)-C(178)-H(17F) | 109.5     |
| C(177)-C(179)-H(17G) | 109.5     |
| C(177)-C(179)-H(17H) | 109.5     |
| C(177)-C(179)-H(17I) | 109.5     |
| H(17G)-C(179)-H(17H) | 109.5     |
| H(17G)-C(179)-H(17I) | 109.5     |
| H(17H)-C(179)-H(17I) | 109.5     |
| C(177)-C(180)-H(18D) | 109.5     |
| C(177)-C(180)-H(18E) | 109.5     |
| C(177)-C(180)-H(18F) | 109.5     |
| H(18D)-C(180)-H(18E) | 109.5     |
| H(18D)-C(180)-H(18F) | 109.5     |
| H(18E)-C(180)-H(18F) | 109.5     |
| C(182)-C(181)-S(22)  | 119.6(13) |
| C(182)-C(181)-C(186) | 116.6(14) |
| C(186)-C(181)-S(22)  | 123.8(12) |
| C(181)-C(182)-H(182) | 119.0     |
| C(181)-C(182)-C(183) | 122.0(19) |
| C(183)-C(182)-H(182) | 119.0     |
| C(182)-C(183)-H(183) | 119.6     |
| C(184)-C(183)-C(182) | 120.8(19) |
| C(184)-C(183)-H(183) | 119.6     |
| C(183)-C(184)-C(185) | 119.0(16) |
| C(183)-C(184)-C(187) | 124.4(17) |
| C(185)-C(184)-C(187) | 116.2(16) |
| C(184)-C(185)-H(185) | 120.8     |
| C(186)-C(185)-C(184) | 118.3(17) |
| C(186)-C(185)-H(185) | 120.8     |
| C(181)-C(186)-H(186) | 118.5     |

|                      |           |
|----------------------|-----------|
| C(185)-C(186)-C(181) | 123.0(17) |
| C(185)-C(186)-H(186) | 118.5     |
| C(184)-C(187)-C(190) | 109.4(17) |
| C(188)-C(187)-C(184) | 111.4(15) |
| C(188)-C(187)-C(189) | 108.3(18) |
| C(188)-C(187)-C(190) | 107.2(16) |
| C(189)-C(187)-C(184) | 112.4(16) |
| C(189)-C(187)-C(190) | 108.0(16) |
| C(187)-C(188)-H(18G) | 109.5     |
| C(187)-C(188)-H(18H) | 109.5     |
| C(187)-C(188)-H(18I) | 109.5     |
| H(18G)-C(188)-H(18H) | 109.5     |
| H(18G)-C(188)-H(18I) | 109.5     |
| H(18H)-C(188)-H(18I) | 109.5     |
| C(187)-C(189)-H(18J) | 109.5     |
| C(187)-C(189)-H(18K) | 109.5     |
| C(187)-C(189)-H(18L) | 109.5     |
| H(18J)-C(189)-H(18K) | 109.5     |
| H(18J)-C(189)-H(18L) | 109.5     |
| H(18K)-C(189)-H(18L) | 109.5     |
| C(187)-C(190)-H(19D) | 109.5     |
| C(187)-C(190)-H(19E) | 109.5     |
| C(187)-C(190)-H(19F) | 109.5     |
| H(19D)-C(190)-H(19E) | 109.5     |
| H(19D)-C(190)-H(19F) | 109.5     |
| H(19E)-C(190)-H(19F) | 109.5     |
| C(192)-C(191)-S(21)  | 121.3(12) |
| C(196)-C(191)-S(21)  | 121.8(12) |
| C(196)-C(191)-C(192) | 116.8(14) |
| C(191)-C(192)-H(192) | 119.4     |
| C(191)-C(192)-C(193) | 121.3(16) |
| C(193)-C(192)-H(192) | 119.4     |
| C(192)-C(193)-H(193) | 118.6     |
| C(194)-C(193)-C(192) | 122.8(18) |
| C(194)-C(193)-H(193) | 118.6     |
| C(193)-C(194)-C(195) | 115.8(18) |
| C(193)-C(194)-C(197) | 121.9(19) |
| C(195)-C(194)-C(197) | 122.2(18) |

|                      |           |
|----------------------|-----------|
| C(194)-C(195)-H(195) | 119.0     |
| C(194)-C(195)-C(196) | 122.0(17) |
| C(196)-C(195)-H(195) | 119.0     |
| C(191)-C(196)-C(195) | 121.2(16) |
| C(191)-C(196)-H(196) | 119.4     |
| C(195)-C(196)-H(196) | 119.4     |
| C(198)-C(197)-C(194) | 109.1(18) |
| C(198)-C(197)-C(200) | 109(2)    |
| C(199)-C(197)-C(194) | 111.2(19) |
| C(199)-C(197)-C(198) | 103(2)    |
| C(199)-C(197)-C(200) | 112(2)    |
| C(200)-C(197)-C(194) | 112(2)    |
| C(197)-C(198)-H(19G) | 109.5     |
| C(197)-C(198)-H(19H) | 109.5     |
| C(197)-C(198)-H(19I) | 109.5     |
| H(19G)-C(198)-H(19H) | 109.5     |
| H(19G)-C(198)-H(19I) | 109.5     |
| H(19H)-C(198)-H(19I) | 109.5     |
| C(197)-C(199)-H(19J) | 109.5     |
| C(197)-C(199)-H(19K) | 109.5     |
| C(197)-C(199)-H(19L) | 109.5     |
| H(19J)-C(199)-H(19K) | 109.5     |
| H(19J)-C(199)-H(19L) | 109.5     |
| H(19K)-C(199)-H(19L) | 109.5     |
| C(197)-C(200)-H(20D) | 109.5     |
| C(197)-C(200)-H(20E) | 109.5     |
| C(197)-C(200)-H(20F) | 109.5     |
| H(20D)-C(200)-H(20E) | 109.5     |
| H(20D)-C(200)-H(20F) | 109.5     |
| H(20E)-C(200)-H(20F) | 109.5     |
| C(202)-C(201)-S(23)  | 117.5(11) |
| C(206)-C(201)-S(23)  | 124.6(11) |
| C(206)-C(201)-C(202) | 117.9(13) |
| C(201)-C(202)-H(202) | 119.1     |
| C(201)-C(202)-C(203) | 121.9(15) |
| C(203)-C(202)-H(202) | 119.1     |
| C(202)-C(203)-H(203) | 120.0     |
| C(202)-C(203)-C(204) | 120.1(15) |

|                      |           |
|----------------------|-----------|
| C(204)-C(203)-H(203) | 120.0     |
| C(203)-C(204)-C(207) | 123.0(14) |
| C(205)-C(204)-C(203) | 118.0(13) |
| C(205)-C(204)-C(207) | 119.0(13) |
| C(204)-C(205)-H(205) | 119.6     |
| C(204)-C(205)-C(206) | 120.8(14) |
| C(206)-C(205)-H(205) | 119.6     |
| C(201)-C(206)-C(205) | 121.4(15) |
| C(201)-C(206)-H(206) | 119.3     |
| C(205)-C(206)-H(206) | 119.3     |
| C(208)-C(207)-C(204) | 107.7(14) |
| C(208)-C(207)-C(209) | 111.3(15) |
| C(208)-C(207)-C(210) | 108.7(14) |
| C(209)-C(207)-C(204) | 107.7(13) |
| C(209)-C(207)-C(210) | 110.5(15) |
| C(210)-C(207)-C(204) | 111.1(13) |
| C(207)-C(208)-H(20G) | 109.5     |
| C(207)-C(208)-H(20H) | 109.5     |
| C(207)-C(208)-H(20I) | 109.5     |
| H(20G)-C(208)-H(20H) | 109.5     |
| H(20G)-C(208)-H(20I) | 109.5     |
| H(20H)-C(208)-H(20I) | 109.5     |
| C(207)-C(209)-H(20J) | 109.5     |
| C(207)-C(209)-H(20K) | 109.5     |
| C(207)-C(209)-H(20L) | 109.5     |
| H(20J)-C(209)-H(20K) | 109.5     |
| H(20J)-C(209)-H(20L) | 109.5     |
| H(20K)-C(209)-H(20L) | 109.5     |
| C(207)-C(210)-H(21A) | 109.5     |
| C(207)-C(210)-H(21B) | 109.5     |
| C(207)-C(210)-H(21C) | 109.5     |
| H(21A)-C(210)-H(21B) | 109.5     |
| H(21A)-C(210)-H(21C) | 109.5     |
| H(21B)-C(210)-H(21C) | 109.5     |
| C(212)-C(211)-S(26)  | 123.5(12) |
| C(216)-C(211)-S(26)  | 117.1(12) |
| C(216)-C(211)-C(212) | 119.3(15) |
| C(211)-C(212)-H(212) | 118.6     |

|                      |           |
|----------------------|-----------|
| C(213)-C(212)-C(211) | 122.8(15) |
| C(213)-C(212)-H(212) | 118.6     |
| C(212)-C(213)-H(213) | 119.9     |
| C(212)-C(213)-C(214) | 120.1(16) |
| C(214)-C(213)-H(213) | 119.9     |
| C(213)-C(214)-C(215) | 117.0(17) |
| C(213)-C(214)-C(217) | 118.3(16) |
| C(215)-C(214)-C(217) | 124.7(17) |
| C(214)-C(215)-H(215) | 118.9     |
| C(214)-C(215)-C(216) | 122.1(17) |
| C(216)-C(215)-H(215) | 118.9     |
| C(211)-C(216)-C(215) | 118.4(16) |
| C(211)-C(216)-H(216) | 120.8     |
| C(215)-C(216)-H(216) | 120.8     |
| C(218)-C(217)-C(214) | 111(2)    |
| C(218)-C(217)-C(219) | 108(2)    |
| C(218)-C(217)-C(220) | 112(2)    |
| C(219)-C(217)-C(214) | 109.0(18) |
| C(220)-C(217)-C(214) | 109.3(19) |
| C(220)-C(217)-C(219) | 107(2)    |
| C(217)-C(218)-H(21D) | 109.5     |
| C(217)-C(218)-H(21E) | 109.5     |
| C(217)-C(218)-H(21F) | 109.5     |
| H(21D)-C(218)-H(21E) | 109.5     |
| H(21D)-C(218)-H(21F) | 109.5     |
| H(21E)-C(218)-H(21F) | 109.5     |
| C(217)-C(219)-H(21G) | 109.5     |
| C(217)-C(219)-H(21H) | 109.5     |
| C(217)-C(219)-H(21I) | 109.5     |
| H(21G)-C(219)-H(21H) | 109.5     |
| H(21G)-C(219)-H(21I) | 109.5     |
| H(21H)-C(219)-H(21I) | 109.5     |
| C(217)-C(220)-H(22A) | 109.5     |
| C(217)-C(220)-H(22B) | 109.5     |
| C(217)-C(220)-H(22C) | 109.5     |
| H(22A)-C(220)-H(22B) | 109.5     |
| H(22A)-C(220)-H(22C) | 109.5     |
| H(22B)-C(220)-H(22C) | 109.5     |



|                      |           |
|----------------------|-----------|
| C(222)-C(221)-S(25)  | 121.8(15) |
| C(226)-C(221)-S(25)  | 120.0(12) |
| C(226)-C(221)-C(222) | 118.2(17) |
| C(221)-C(222)-H(222) | 120.4     |
| C(223)-C(222)-C(221) | 119(2)    |
| C(223)-C(222)-H(222) | 120.4     |
| C(222)-C(223)-H(223) | 118.8     |
| C(224)-C(223)-C(222) | 122(2)    |
| C(224)-C(223)-H(223) | 118.8     |
| C(223)-C(224)-C(225) | 121(2)    |
| C(223)-C(224)-C(227) | 119(2)    |
| C(225)-C(224)-C(227) | 120(2)    |
| C(224)-C(225)-H(225) | 122.0     |
| C(226)-C(225)-C(224) | 116(2)    |
| C(226)-C(225)-H(225) | 122.0     |
| C(221)-C(226)-C(225) | 123.5(18) |
| C(221)-C(226)-H(226) | 118.3     |
| C(225)-C(226)-H(226) | 118.3     |
| C(228)-C(227)-C(224) | 117(2)    |
| C(228)-C(227)-C(229) | 104(2)    |
| C(228)-C(227)-C(260) | 109(2)    |
| C(229)-C(227)-C(224) | 113(2)    |
| C(260)-C(227)-C(224) | 109(2)    |
| C(260)-C(227)-C(229) | 105(2)    |
| C(227)-C(228)-H(22D) | 109.5     |
| C(227)-C(228)-H(22E) | 109.5     |
| C(227)-C(228)-H(22F) | 109.5     |
| H(22D)-C(228)-H(22E) | 109.5     |
| H(22D)-C(228)-H(22F) | 109.5     |
| H(22E)-C(228)-H(22F) | 109.5     |
| C(227)-C(229)-H(22G) | 109.5     |
| C(227)-C(229)-H(22H) | 109.5     |
| C(227)-C(229)-H(22I) | 109.5     |
| H(22G)-C(229)-H(22H) | 109.5     |
| H(22G)-C(229)-H(22I) | 109.5     |
| H(22H)-C(229)-H(22I) | 109.5     |
| C(231)-C(230)-S(24)  | 119.2(11) |
| C(235)-C(230)-S(24)  | 123.5(11) |

|                      |           |
|----------------------|-----------|
| C(235)-C(230)-C(231) | 116.1(14) |
| C(230)-C(231)-H(231) | 118.9     |
| C(232)-C(231)-C(230) | 122.3(15) |
| C(232)-C(231)-H(231) | 118.9     |
| C(231)-C(232)-H(232) | 119.0     |
| C(231)-C(232)-C(233) | 122.0(17) |
| C(233)-C(232)-H(232) | 119.0     |
| C(232)-C(233)-C(234) | 116.7(16) |
| C(232)-C(233)-C(236) | 123.0(16) |
| C(234)-C(233)-C(236) | 120.3(15) |
| C(233)-C(234)-H(234) | 119.9     |
| C(235)-C(234)-C(233) | 120.2(16) |
| C(235)-C(234)-H(234) | 119.9     |
| C(230)-C(235)-H(235) | 118.8     |
| C(234)-C(235)-C(230) | 122.3(15) |
| C(234)-C(235)-H(235) | 118.8     |
| C(233)-C(236)-C(237) | 106.7(19) |
| C(238)-C(236)-C(233) | 112.2(19) |
| C(238)-C(236)-C(237) | 106.4(19) |
| C(238)-C(236)-C(239) | 112(2)    |
| C(239)-C(236)-C(233) | 112.3(18) |
| C(239)-C(236)-C(237) | 107(2)    |
| C(236)-C(237)-H(23A) | 109.5     |
| C(236)-C(237)-H(23B) | 109.5     |
| C(236)-C(237)-H(23C) | 109.5     |
| H(23A)-C(237)-H(23B) | 109.5     |
| H(23A)-C(237)-H(23C) | 109.5     |
| H(23B)-C(237)-H(23C) | 109.5     |
| C(236)-C(238)-H(23D) | 109.5     |
| C(236)-C(238)-H(23E) | 109.5     |
| C(236)-C(238)-H(23F) | 109.5     |
| H(23D)-C(238)-H(23E) | 109.5     |
| H(23D)-C(238)-H(23F) | 109.5     |
| H(23E)-C(238)-H(23F) | 109.5     |
| C(236)-C(239)-H(23G) | 109.5     |
| C(236)-C(239)-H(23H) | 109.5     |
| C(236)-C(239)-H(23I) | 109.5     |
| H(23G)-C(239)-H(23H) | 109.5     |

|                      |           |
|----------------------|-----------|
| H(23G)-C(239)-H(23I) | 109.5     |
| H(23H)-C(239)-H(23I) | 109.5     |
| C(241)-C(240)-S(2)   | 125.2(13) |
| C(241)-C(240)-C(245) | 115.5(16) |
| C(245)-C(240)-S(2)   | 119.2(13) |
| C(240)-C(241)-H(241) | 119.3     |
| C(240)-C(241)-C(242) | 121.5(16) |
| C(242)-C(241)-H(241) | 119.3     |
| C(241)-C(242)-H(242) | 119.1     |
| C(243)-C(242)-C(241) | 121.8(17) |
| C(243)-C(242)-H(242) | 119.1     |
| C(242)-C(243)-C(244) | 117.0(18) |
| C(242)-C(243)-C(246) | 121.0(17) |
| C(244)-C(243)-C(246) | 122.0(17) |
| C(243)-C(244)-H(244) | 119.5     |
| C(245)-C(244)-C(243) | 121.0(18) |
| C(245)-C(244)-H(244) | 119.5     |
| C(240)-C(245)-H(245) | 118.5     |
| C(244)-C(245)-C(240) | 123.1(17) |
| C(244)-C(245)-H(245) | 118.5     |
| C(243)-C(246)-C(247) | 109(2)    |
| C(243)-C(246)-C(248) | 112.0(19) |
| C(247)-C(246)-C(248) | 109(2)    |
| C(249)-C(246)-C(243) | 111(2)    |
| C(249)-C(246)-C(247) | 110(2)    |
| C(249)-C(246)-C(248) | 106(2)    |
| C(246)-C(247)-H(24A) | 109.5     |
| C(246)-C(247)-H(24B) | 109.5     |
| C(246)-C(247)-H(24C) | 109.5     |
| H(24A)-C(247)-H(24B) | 109.5     |
| H(24A)-C(247)-H(24C) | 109.5     |
| H(24B)-C(247)-H(24C) | 109.5     |
| C(246)-C(248)-H(24D) | 109.5     |
| C(246)-C(248)-H(24E) | 109.5     |
| C(246)-C(248)-H(24F) | 109.5     |
| H(24D)-C(248)-H(24E) | 109.5     |
| H(24D)-C(248)-H(24F) | 109.5     |
| H(24E)-C(248)-H(24F) | 109.5     |

|                      |           |
|----------------------|-----------|
| C(246)-C(249)-H(24G) | 109.5     |
| C(246)-C(249)-H(24H) | 109.5     |
| C(246)-C(249)-H(24I) | 109.5     |
| H(24G)-C(249)-H(24H) | 109.5     |
| H(24G)-C(249)-H(24I) | 109.5     |
| H(24H)-C(249)-H(24I) | 109.5     |
| C(251)-C(250)-S(1)   | 122.8(13) |
| C(255)-C(250)-S(1)   | 119.3(14) |
| C(255)-C(250)-C(251) | 117.7(15) |
| C(250)-C(251)-H(251) | 120.2     |
| C(252)-C(251)-C(250) | 119.7(15) |
| C(252)-C(251)-H(251) | 120.2     |
| C(251)-C(252)-H(252) | 118.8     |
| C(251)-C(252)-C(253) | 122.4(16) |
| C(253)-C(252)-H(252) | 118.8     |
| C(252)-C(253)-C(256) | 123.2(16) |
| C(254)-C(253)-C(252) | 116.6(15) |
| C(254)-C(253)-C(256) | 120.0(17) |
| C(253)-C(254)-H(254) | 118.4     |
| C(253)-C(254)-C(255) | 123.3(17) |
| C(255)-C(254)-H(254) | 118.4     |
| C(250)-C(255)-C(254) | 120.3(17) |
| C(250)-C(255)-H(255) | 119.9     |
| C(254)-C(255)-H(255) | 119.9     |
| C(257)-C(256)-C(253) | 108.9(17) |
| C(258)-C(256)-C(253) | 113(2)    |
| C(258)-C(256)-C(257) | 110(2)    |
| C(258)-C(256)-C(259) | 114(2)    |
| C(259)-C(256)-C(253) | 110.0(17) |
| C(259)-C(256)-C(257) | 99.7(19)  |
| C(256)-C(257)-H(25A) | 109.5     |
| C(256)-C(257)-H(25B) | 109.5     |
| C(256)-C(257)-H(25C) | 109.5     |
| H(25A)-C(257)-H(25B) | 109.5     |
| H(25A)-C(257)-H(25C) | 109.5     |
| H(25B)-C(257)-H(25C) | 109.5     |
| C(256)-C(258)-H(25D) | 109.5     |
| C(256)-C(258)-H(25E) | 109.5     |

|                      |       |
|----------------------|-------|
| C(256)-C(258)-H(25F) | 109.5 |
| H(25D)-C(258)-H(25E) | 109.5 |
| H(25D)-C(258)-H(25F) | 109.5 |
| H(25E)-C(258)-H(25F) | 109.5 |
| C(256)-C(259)-H(25G) | 109.5 |
| C(256)-C(259)-H(25H) | 109.5 |
| C(256)-C(259)-H(25I) | 109.5 |
| H(25G)-C(259)-H(25H) | 109.5 |
| H(25G)-C(259)-H(25I) | 109.5 |
| H(25H)-C(259)-H(25I) | 109.5 |
| C(227)-C(260)-H(26A) | 109.5 |
| C(227)-C(260)-H(26B) | 109.5 |
| C(227)-C(260)-H(26C) | 109.5 |
| H(26A)-C(260)-H(26B) | 109.5 |
| H(26A)-C(260)-H(26C) | 109.5 |
| H(26B)-C(260)-H(26C) | 109.5 |

---

Symmetry transformations used to generate equivalent atoms:

Table 4. Anisotropic displacement parameters ( $\text{\AA}^2 \times 10^3$ ) for  $\text{Au}_{42}(\text{TBBT})_{26}$ . The anisotropic displacement factor exponent takes the form:  $-2\pi^2 [ h^2 a^{*2} U^{11} + \dots + 2 h k a^* b^* U^{12} ]$

|        | $U^{11}$ | $U^{22}$ | $U^{33}$ | $U^{23}$ | $U^{13}$ | $U^{12}$ |
|--------|----------|----------|----------|----------|----------|----------|
| Au(1)  | 13       | 22       | 10       | -2       | -1       | -3       |
| Au(2)  | 16       | 28       | 15       | -6       | -1       | 0        |
| Au(3)  | 15       | 19       | 12       | -4       | -2       | -2       |
| Au(4)  | 15       | 22       | 13       | -4       | -1       | -4       |
| Au(5)  | 18       | 27       | 11       | -5       | -1       | -3       |
| Au(6)  | 21       | 26       | 20       | -1       | -7       | 0        |
| Au(7)  | 16       | 25       | 14       | -5       | 0        | -4       |
| Au(8)  | 21       | 28       | 18       | -9       | -3       | -4       |
| Au(9)  | 22       | 25       | 21       | -7       | -8       | -1       |
| Au(10) | 20       | 25       | 23       | -9       | -5       | -2       |
| Au(11) | 19       | 26       | 13       | -5       | -3       | 1        |
| Au(12) | 18       | 23       | 14       | -5       | -6       | -1       |
| Au(13) | 14       | 19       | 13       | -4       | -3       | 0        |
| Au(14) | 13       | 19       | 11       | -3       | -3       | -3       |
| Au(15) | 16       | 24       | 14       | -4       | -5       | -2       |
| Au(16) | 14       | 26       | 15       | -5       | -4       | -2       |
| Au(17) | 14       | 26       | 14       | -6       | -1       | 0        |
| Au(18) | 22       | 33       | 17       | -7       | -5       | 3        |
| Au(19) | 20       | 31       | 19       | -5       | -5       | -3       |
| Au(20) | 13       | 20       | 12       | -4       | -4       | -1       |
| Au(21) | 14       | 20       | 12       | -3       | -2       | -4       |
| Au(22) | 15       | 28       | 14       | -4       | -1       | -1       |
| Au(23) | 20       | 24       | 17       | -4       | -4       | -5       |
| Au(24) | 19       | 29       | 17       | -7       | -5       | 1        |
| Au(25) | 17       | 23       | 12       | -3       | -3       | -2       |
| Au(26) | 21       | 28       | 17       | -6       | -3       | 0        |
| Au(27) | 21       | 28       | 21       | -7       | -8       | 1        |
| Au(28) | 22       | 23       | 22       | -5       | -9       | 0        |
| Au(29) | 24       | 22       | 20       | -5       | -9       | 3        |
| Au(30) | 21       | 23       | 16       | -7       | -3       | -3       |
| Au(31) | 16       | 26       | 17       | -7       | -1       | -2       |
| Au(32) | 16       | 22       | 17       | -5       | -5       | -1       |
| Au(33) | 21       | 31       | 19       | -9       | -2       | -2       |

|        |    |    |    |     |     |    |
|--------|----|----|----|-----|-----|----|
| Au(34) | 22 | 27 | 20 | -7  | -4  | -3 |
| Au(35) | 18 | 24 | 13 | -7  | -1  | -2 |
| Au(36) | 22 | 27 | 14 | -6  | -1  | -2 |
| Au(37) | 21 | 27 | 21 | -3  | -8  | -3 |
| Au(38) | 24 | 27 | 24 | -8  | -6  | 2  |
| Au(39) | 20 | 28 | 24 | -6  | -1  | -3 |
| Au(40) | 20 | 31 | 17 | -5  | -2  | -2 |
| Au(41) | 33 | 34 | 19 | -10 | -3  | -1 |
| Au(42) | 31 | 36 | 20 | -4  | -4  | -2 |
| S(1)   | 24 | 23 | 15 | -9  | -3  | 0  |
| S(2)   | 26 | 29 | 26 | -10 | -5  | -4 |
| S(3)   | 23 | 28 | 16 | -5  | -2  | 2  |
| S(4)   | 23 | 29 | 22 | -6  | -1  | -2 |
| S(5)   | 20 | 32 | 18 | -6  | -5  | -3 |
| S(6)   | 27 | 32 | 16 | -8  | -4  | 2  |
| S(7)   | 19 | 32 | 19 | -7  | 1   | -7 |
| S(8)   | 22 | 24 | 21 | -5  | -10 | 3  |
| S(9)   | 20 | 35 | 22 | -10 | -7  | 2  |
| S(10)  | 22 | 28 | 21 | -10 | -1  | -7 |
| S(11)  | 18 | 28 | 16 | -5  | 2   | -6 |
| S(12)  | 23 | 23 | 18 | -3  | -2  | -6 |
| S(13)  | 19 | 34 | 11 | -6  | 0   | -4 |
| S(14)  | 21 | 32 | 19 | -10 | -2  | -3 |
| S(15)  | 27 | 27 | 24 | -8  | -8  | -5 |
| S(16)  | 18 | 34 | 13 | -1  | -6  | -6 |
| S(17)  | 28 | 24 | 20 | -5  | -9  | 3  |
| S(18)  | 26 | 40 | 24 | -11 | -4  | 2  |
| S(19)  | 20 | 30 | 26 | -10 | -4  | -4 |
| S(20)  | 22 | 28 | 24 | -15 | -9  | 6  |
| S(21)  | 19 | 35 | 14 | -4  | -2  | 0  |
| S(22)  | 18 | 35 | 19 | -10 | 1   | -3 |
| S(23)  | 17 | 32 | 21 | -10 | -7  | -2 |
| S(24)  | 22 | 33 | 23 | -10 | 1   | -5 |
| S(25)  | 37 | 36 | 19 | -9  | -2  | 0  |
| S(26)  | 26 | 31 | 27 | -4  | -6  | 1  |
| C(1)   | 14 | 18 | 14 | -5  | -1  | -2 |
| C(2)   | 26 | 22 | 29 | -11 | -5  | 2  |
| C(3)   | 41 | 43 | 42 | -14 | -7  | 4  |

|       |     |     |     |     |     |     |
|-------|-----|-----|-----|-----|-----|-----|
| C(4)  | 33  | 35  | 30  | -12 | -5  | 1   |
| C(5)  | 32  | 36  | 31  | -12 | -5  | -2  |
| C(6)  | 32  | 33  | 28  | -13 | -6  | -3  |
| C(7)  | 51  | 50  | 50  | -22 | -7  | 1   |
| C(8)  | 48  | 61  | 40  | -15 | -2  | -2  |
| C(9)  | 70  | 90  | 70  | -31 | -16 | -14 |
| C(10) | 126 | 115 | 114 | -49 | -21 | -2  |
| C(11) | 25  | 27  | 24  | -12 | -10 | -5  |
| C(12) | 41  | 44  | 39  | -16 | -11 | -1  |
| C(13) | 55  | 56  | 54  | -21 | -16 | 1   |
| C(14) | 55  | 57  | 54  | -22 | -11 | 1   |
| C(15) | 37  | 43  | 39  | -12 | -10 | -2  |
| C(16) | 28  | 27  | 26  | -4  | -9  | 0   |
| C(17) | 78  | 78  | 79  | -32 | -17 | 1   |
| C(18) | 96  | 103 | 98  | -34 | -28 | -5  |
| C(19) | 97  | 98  | 83  | -29 | -26 | -14 |
| C(20) | 172 | 163 | 167 | -64 | -32 | -5  |
| C(21) | 30  | 32  | 34  | -12 | -10 | -2  |
| C(22) | 55  | 56  | 54  | -19 | -14 | 1   |
| C(23) | 70  | 70  | 68  | -25 | -18 | -3  |
| C(24) | 141 | 143 | 143 | -54 | -32 | -2  |
| C(25) | 57  | 60  | 60  | -21 | -15 | 1   |
| C(26) | 62  | 61  | 63  | -21 | -13 | 3   |
| C(27) | 154 | 155 | 156 | -56 | -32 | -1  |
| C(28) | 169 | 169 | 175 | -55 | -32 | 0   |
| C(29) | 165 | 163 | 168 | -56 | -46 | -7  |
| C(30) | 179 | 176 | 173 | -61 | -32 | 12  |
| C(31) | 22  | 20  | 21  | -10 | -5  | 0   |
| C(32) | 29  | 25  | 24  | -7  | -9  | -3  |
| C(33) | 30  | 31  | 32  | -8  | -10 | -1  |
| C(34) | 24  | 30  | 24  | -9  | -6  | -3  |
| C(35) | 35  | 38  | 35  | -12 | -7  | -4  |
| C(36) | 22  | 21  | 21  | -4  | -6  | -4  |
| C(37) | 36  | 40  | 36  | -12 | -9  | -1  |
| C(38) | 41  | 36  | 40  | -19 | -7  | -7  |
| C(39) | 48  | 34  | 40  | -9  | -13 | -5  |
| C(40) | 31  | 47  | 45  | -14 | -1  | 1   |
| C(41) | 24  | 17  | 18  | -8  | 0   | -2  |



|       |     |     |    |     |     |     |
|-------|-----|-----|----|-----|-----|-----|
| C(42) | 30  | 33  | 29 | -12 | -7  | -1  |
| C(43) | 28  | 32  | 29 | -9  | -6  | -3  |
| C(44) | 31  | 32  | 30 | -10 | -8  | -4  |
| C(45) | 49  | 44  | 44 | -16 | -9  | -4  |
| C(46) | 39  | 37  | 35 | -14 | -8  | -2  |
| C(47) | 55  | 56  | 49 | -20 | -14 | -1  |
| C(48) | 86  | 81  | 70 | -36 | -17 | 14  |
| C(49) | 92  | 105 | 86 | -36 | -25 | 4   |
| C(50) | 102 | 95  | 88 | -27 | -27 | -4  |
| C(51) | 18  | 17  | 21 | -6  | -5  | 3   |
| C(52) | 34  | 38  | 31 | -12 | -11 | -4  |
| C(53) | 32  | 34  | 31 | -12 | -7  | -5  |
| C(54) | 22  | 25  | 27 | -7  | -3  | 1   |
| C(55) | 34  | 36  | 35 | -12 | -9  | -2  |
| C(56) | 33  | 37  | 33 | -15 | -8  | 0   |
| C(57) | 44  | 45  | 45 | -17 | -9  | 2   |
| C(58) | 49  | 50  | 57 | -19 | -3  | -10 |
| C(59) | 56  | 52  | 55 | -26 | -11 | 2   |
| C(60) | 59  | 57  | 68 | -24 | -21 | 8   |
| C(61) | 23  | 24  | 24 | -7  | -5  | -2  |
| C(62) | 27  | 28  | 27 | -9  | -8  | 2   |
| C(63) | 29  | 28  | 26 | -7  | -5  | -2  |
| C(64) | 31  | 31  | 27 | -13 | -8  | -4  |
| C(65) | 23  | 26  | 25 | -7  | -4  | -1  |
| C(66) | 29  | 30  | 29 | -10 | -6  | 0   |
| C(67) | 43  | 46  | 44 | -16 | -9  | -2  |
| C(68) | 41  | 58  | 45 | -9  | -14 | 0   |
| C(69) | 38  | 54  | 50 | -15 | -18 | 4   |
| C(70) | 53  | 60  | 61 | -19 | -16 | -9  |
| C(71) | 20  | 20  | 21 | -8  | -1  | -1  |
| C(72) | 34  | 37  | 36 | -14 | -5  | -1  |
| C(73) | 25  | 29  | 26 | -11 | 0   | 3   |
| C(74) | 43  | 46  | 47 | -19 | -10 | -1  |
| C(75) | 35  | 37  | 37 | -13 | -6  | -1  |
| C(76) | 23  | 23  | 22 | -6  | 0   | 1   |
| C(77) | 57  | 60  | 61 | -22 | -16 | -2  |
| C(78) | 79  | 85  | 90 | -16 | -24 | -3  |
| C(79) | 86  | 99  | 91 | -32 | -18 | 3   |

|        |     |     |     |     |     |     |
|--------|-----|-----|-----|-----|-----|-----|
| C(80)  | 96  | 101 | 109 | -26 | -30 | -4  |
| C(81)  | 21  | 24  | 16  | -7  | -4  | 2   |
| C(82)  | 33  | 32  | 30  | -14 | -8  | 3   |
| C(83)  | 38  | 37  | 36  | -14 | -10 | -2  |
| C(84)  | 28  | 30  | 28  | -9  | -11 | 0   |
| C(85)  | 26  | 31  | 26  | -9  | -9  | -1  |
| C(86)  | 27  | 32  | 24  | -7  | -5  | -1  |
| C(87)  | 62  | 65  | 62  | -22 | -18 | 1   |
| C(88)  | 57  | 54  | 57  | -26 | -26 | -3  |
| C(89)  | 62  | 71  | 74  | -26 | -24 | 6   |
| C(90)  | 77  | 69  | 72  | -20 | -25 | -2  |
| C(91)  | 22  | 23  | 19  | -10 | -1  | 0   |
| C(92)  | 33  | 34  | 31  | -13 | -9  | 1   |
| C(93)  | 39  | 36  | 35  | -13 | -8  | -1  |
| C(94)  | 44  | 43  | 39  | -15 | -13 | -1  |
| C(95)  | 36  | 31  | 33  | -17 | -7  | 1   |
| C(96)  | 29  | 28  | 31  | -10 | -4  | -2  |
| C(97)  | 57  | 53  | 53  | -22 | -12 | -2  |
| C(98)  | 87  | 89  | 92  | -38 | -21 | -20 |
| C(99)  | 119 | 113 | 112 | -49 | -22 | -10 |
| C(100) | 97  | 99  | 87  | -37 | -29 | -2  |
| C(101) | 18  | 18  | 19  | -8  | -5  | 2   |
| C(102) | 38  | 40  | 38  | -13 | -9  | 3   |
| C(103) | 43  | 47  | 46  | -18 | -10 | 1   |
| C(104) | 32  | 35  | 30  | -10 | -10 | -3  |
| C(105) | 32  | 33  | 31  | -11 | -9  | 0   |
| C(106) | 34  | 35  | 36  | -10 | -8  | 0   |
| C(107) | 32  | 38  | 34  | -11 | -10 | -1  |
| C(108) | 43  | 55  | 39  | -7  | -19 | 2   |
| C(109) | 34  | 55  | 49  | -17 | -15 | 15  |
| C(110) | 43  | 62  | 61  | -21 | -17 | -4  |
| C(111) | 32  | 36  | 35  | -9  | -11 | -3  |
| C(112) | 76  | 72  | 76  | -25 | -19 | -1  |
| C(113) | 81  | 80  | 81  | -30 | -20 | -4  |
| C(114) | 84  | 85  | 85  | -33 | -21 | -3  |
| C(115) | 48  | 51  | 52  | -20 | -13 | -3  |
| C(116) | 48  | 51  | 50  | -17 | -13 | 0   |
| C(117) | 99  | 101 | 102 | -37 | -23 | -3  |

|        |     |     |     |     |     |     |
|--------|-----|-----|-----|-----|-----|-----|
| C(118) | 124 | 130 | 128 | -41 | -36 | -14 |
| C(119) | 123 | 128 | 122 | -41 | -30 | -14 |
| C(120) | 128 | 122 | 131 | -50 | -21 | 0   |
| C(121) | 28  | 28  | 26  | -11 | -6  | 4   |
| C(122) | 24  | 23  | 21  | -8  | -4  | 0   |
| C(123) | 32  | 28  | 30  | -10 | -5  | -3  |
| C(124) | 34  | 32  | 33  | -11 | -3  | 3   |
| C(125) | 38  | 38  | 37  | -16 | -8  | -2  |
| C(126) | 33  | 34  | 31  | -11 | -5  | 2   |
| C(127) | 43  | 41  | 43  | -15 | -4  | 0   |
| C(128) | 61  | 72  | 66  | -25 | -1  | -4  |
| C(129) | 68  | 47  | 56  | -27 | 5   | 5   |
| C(130) | 69  | 62  | 50  | -30 | 0   | -10 |
| C(131) | 16  | 18  | 20  | -5  | -5  | -1  |
| C(132) | 31  | 32  | 35  | -10 | -3  | -6  |
| C(133) | 32  | 35  | 33  | -9  | -6  | -1  |
| C(134) | 37  | 37  | 38  | -13 | -6  | 0   |
| C(135) | 35  | 35  | 36  | -15 | -5  | 1   |
| C(136) | 31  | 31  | 29  | -10 | -8  | 1   |
| C(137) | 37  | 40  | 39  | -11 | -6  | 1   |
| C(138) | 61  | 61  | 51  | -15 | -8  | 2   |
| C(139) | 60  | 79  | 69  | -23 | -7  | -15 |
| C(140) | 85  | 78  | 87  | -30 | 0   | 12  |
| C(141) | 26  | 21  | 25  | -10 | -4  | 2   |
| C(142) | 23  | 27  | 22  | -8  | -5  | 3   |
| C(143) | 31  | 35  | 33  | -12 | -8  | 0   |
| C(144) | 36  | 37  | 36  | -13 | -1  | 1   |
| C(145) | 57  | 53  | 55  | -22 | -6  | -1  |
| C(146) | 45  | 45  | 46  | -18 | -5  | -2  |
| C(147) | 51  | 50  | 51  | -19 | -5  | -2  |
| C(148) | 74  | 60  | 65  | -33 | -13 | 3   |
| C(149) | 68  | 58  | 52  | -26 | 1   | -9  |
| C(150) | 68  | 76  | 74  | -29 | -24 | 8   |
| C(151) | 21  | 16  | 21  | -5  | -8  | -1  |
| C(152) | 26  | 27  | 29  | -9  | -8  | -2  |
| C(153) | 40  | 39  | 41  | -10 | -10 | -2  |
| C(154) | 43  | 43  | 44  | -15 | -6  | 2   |
| C(155) | 41  | 41  | 37  | -14 | -10 | -1  |

|        |     |     |    |     |     |    |
|--------|-----|-----|----|-----|-----|----|
| C(156) | 36  | 31  | 34 | -11 | -7  | -4 |
| C(157) | 57  | 59  | 56 | -22 | -7  | 1  |
| C(158) | 75  | 71  | 69 | -22 | 1   | -1 |
| C(159) | 78  | 83  | 77 | -34 | -11 | -1 |
| C(160) | 95  | 89  | 98 | -41 | -7  | 2  |
| C(161) | 20  | 19  | 23 | -7  | -2  | 0  |
| C(162) | 27  | 31  | 29 | -9  | -8  | 1  |
| C(163) | 39  | 42  | 36 | -14 | -10 | 1  |
| C(164) | 33  | 35  | 31 | -9  | -7  | 0  |
| C(165) | 42  | 41  | 42 | -15 | -9  | 1  |
| C(166) | 23  | 24  | 24 | -7  | -6  | 5  |
| C(167) | 38  | 37  | 39 | -8  | -10 | 2  |
| C(168) | 59  | 56  | 57 | -22 | -6  | 8  |
| C(169) | 47  | 60  | 57 | -11 | -25 | -9 |
| C(170) | 45  | 49  | 41 | -3  | -23 | 2  |
| C(171) | 29  | 27  | 28 | -13 | -1  | 0  |
| C(172) | 27  | 25  | 24 | -9  | -4  | 2  |
| C(173) | 48  | 44  | 45 | -17 | -8  | -1 |
| C(174) | 38  | 38  | 39 | -14 | -9  | -2 |
| C(175) | 29  | 30  | 30 | -9  | -5  | 0  |
| C(176) | 35  | 35  | 33 | -11 | -9  | -4 |
| C(177) | 47  | 50  | 45 | -16 | -8  | -2 |
| C(178) | 71  | 76  | 68 | -22 | -2  | 5  |
| C(179) | 79  | 84  | 80 | -28 | -6  | -8 |
| C(180) | 102 | 110 | 95 | -44 | -6  | -2 |
| C(181) | 19  | 21  | 23 | -9  | -3  | -1 |
| C(182) | 36  | 40  | 41 | -15 | -8  | -2 |
| C(183) | 42  | 41  | 45 | -15 | -8  | -1 |
| C(184) | 32  | 32  | 34 | -12 | -5  | 0  |
| C(185) | 34  | 35  | 33 | -14 | -9  | 2  |
| C(186) | 30  | 32  | 31 | -12 | -8  | -1 |
| C(187) | 42  | 43  | 46 | -15 | -10 | 3  |
| C(188) | 44  | 53  | 55 | -22 | -1  | 6  |
| C(189) | 60  | 67  | 70 | -26 | -25 | 1  |
| C(190) | 47  | 58  | 69 | -21 | -15 | 4  |
| C(191) | 19  | 26  | 19 | -7  | -3  | -2 |
| C(192) | 29  | 33  | 33 | -10 | -9  | -2 |
| C(193) | 27  | 30  | 30 | -9  | -10 | 0  |

|        |     |     |     |     |     |     |
|--------|-----|-----|-----|-----|-----|-----|
| C(194) | 45  | 48  | 47  | -16 | -12 | 0   |
| C(195) | 40  | 40  | 39  | -13 | -9  | 0   |
| C(196) | 23  | 27  | 27  | -11 | -2  | 1   |
| C(197) | 57  | 60  | 59  | -22 | -14 | 0   |
| C(198) | 80  | 86  | 74  | -23 | -22 | -3  |
| C(199) | 88  | 92  | 100 | -25 | -27 | -14 |
| C(200) | 91  | 100 | 102 | -32 | -19 | 3   |
| C(201) | 19  | 14  | 16  | -7  | -5  | 0   |
| C(202) | 28  | 30  | 27  | -11 | -4  | -1  |
| C(203) | 27  | 26  | 22  | -11 | -8  | 0   |
| C(204) | 27  | 27  | 25  | -10 | -11 | -5  |
| C(205) | 24  | 30  | 29  | -8  | -8  | 0   |
| C(206) | 30  | 27  | 29  | -8  | -8  | 3   |
| C(207) | 31  | 32  | 31  | -9  | -7  | 0   |
| C(208) | 43  | 34  | 35  | -10 | -16 | -3  |
| C(209) | 39  | 44  | 42  | -11 | -16 | 9   |
| C(210) | 49  | 44  | 37  | -10 | -15 | -5  |
| C(211) | 28  | 29  | 29  | -8  | -6  | -1  |
| C(212) | 31  | 30  | 32  | -14 | -4  | 2   |
| C(213) | 33  | 31  | 32  | -12 | -5  | -1  |
| C(214) | 45  | 45  | 44  | -15 | -7  | -1  |
| C(215) | 51  | 49  | 47  | -15 | -11 | 2   |
| C(216) | 32  | 33  | 34  | -16 | -5  | 0   |
| C(217) | 63  | 64  | 61  | -24 | -11 | -2  |
| C(218) | 88  | 81  | 76  | -32 | -3  | 7   |
| C(219) | 99  | 101 | 86  | -31 | -14 | 1   |
| C(220) | 93  | 85  | 80  | -33 | -4  | -10 |
| C(221) | 29  | 28  | 23  | -10 | -3  | -3  |
| C(222) | 58  | 57  | 55  | -18 | -12 | -2  |
| C(223) | 62  | 57  | 58  | -23 | -9  | -2  |
| C(224) | 91  | 90  | 89  | -33 | -21 | -2  |
| C(225) | 53  | 53  | 51  | -21 | -8  | -4  |
| C(226) | 41  | 39  | 37  | -16 | -4  | -1  |
| C(227) | 103 | 102 | 102 | -39 | -21 | -4  |
| C(228) | 125 | 126 | 121 | -34 | -30 | -11 |
| C(229) | 132 | 121 | 124 | -52 | -12 | -7  |
| C(230) | 21  | 23  | 23  | -9  | -5  | -1  |
| C(231) | 34  | 32  | 31  | -11 | -6  | -2  |

|        |     |     |     |     |     |     |
|--------|-----|-----|-----|-----|-----|-----|
| C(232) | 43  | 44  | 44  | -15 | -10 | -1  |
| C(233) | 38  | 32  | 32  | -16 | -4  | 1   |
| C(234) | 43  | 44  | 41  | -16 | -9  | -4  |
| C(235) | 27  | 28  | 27  | -12 | -4  | -1  |
| C(236) | 59  | 59  | 53  | -22 | -11 | 2   |
| C(237) | 80  | 79  | 77  | -37 | -6  | -2  |
| C(238) | 102 | 102 | 99  | -49 | -20 | -3  |
| C(239) | 106 | 105 | 102 | -38 | -20 | 8   |
| C(240) | 22  | 24  | 23  | -7  | -5  | 0   |
| C(241) | 31  | 32  | 35  | -13 | -4  | 0   |
| C(242) | 30  | 30  | 28  | -11 | -7  | -2  |
| C(243) | 36  | 39  | 38  | -15 | -8  | -3  |
| C(244) | 39  | 43  | 39  | -14 | -11 | -1  |
| C(245) | 38  | 39  | 37  | -16 | -8  | -4  |
| C(246) | 52  | 53  | 53  | -17 | -14 | -4  |
| C(247) | 126 | 123 | 128 | -43 | -37 | -7  |
| C(248) | 103 | 105 | 101 | -33 | -31 | -18 |
| C(249) | 135 | 129 | 136 | -52 | -29 | -5  |
| C(250) | 27  | 31  | 29  | -10 | -3  | 2   |
| C(251) | 13  | 18  | 15  | -2  | -1  | -2  |
| C(252) | 25  | 25  | 25  | -9  | -3  | 1   |
| C(253) | 26  | 28  | 26  | -8  | -4  | 3   |
| C(254) | 30  | 28  | 30  | -10 | -4  | 1   |
| C(255) | 32  | 32  | 31  | -12 | -6  | -2  |
| C(256) | 44  | 47  | 45  | -15 | -6  | 1   |
| C(257) | 81  | 67  | 70  | -31 | -11 | -9  |
| C(258) | 152 | 148 | 145 | -54 | -25 | 6   |
| C(259) | 108 | 122 | 111 | -42 | -27 | -1  |
| C(260) | 112 | 116 | 115 | -38 | -17 | -3  |

---

Table 5. Hydrogen coordinates ( $\times 10^4$ ) and isotropic displacement parameters ( $\text{\AA}^2 \times 10^3$ ) for  $\text{Au}_{42}(\text{TBBT})_{26}$ .

|        | x    | y    | z    | U(eq) |
|--------|------|------|------|-------|
| H(2)   | 601  | 7024 | 3033 | 30    |
| H(3)   | 129  | 7049 | 3739 | 52    |
| H(5)   | 1128 | 5799 | 4373 | 40    |
| H(6)   | 1648 | 5814 | 3668 | 36    |
| H(8A)  | 353  | 5666 | 5067 | 78    |
| H(8B)  | 344  | 6187 | 5231 | 78    |
| H(8C)  | 870  | 6084 | 4884 | 78    |
| H(9A)  | -519 | 6466 | 4396 | 113   |
| H(9B)  | -585 | 6228 | 4930 | 113   |
| H(9C)  | -321 | 5830 | 4655 | 113   |
| H(10A) | 565  | 7151 | 4598 | 176   |
| H(10B) | -59  | 7055 | 4877 | 176   |
| H(10C) | 63   | 7318 | 4340 | 176   |
| H(12)  | 738  | 4752 | 1100 | 48    |
| H(13)  | 338  | 4404 | 667  | 65    |
| H(15)  | 1558 | 3208 | 708  | 48    |
| H(16)  | 1950 | 3548 | 1149 | 34    |
| H(18A) | 112  | 2835 | 954  | 147   |
| H(18B) | -212 | 3087 | 550  | 147   |
| H(18C) | -174 | 3452 | 846  | 147   |
| H(19A) | 147  | 4184 | 124  | 138   |
| H(19B) | 226  | 3786 | -164 | 138   |
| H(19C) | 727  | 4166 | -203 | 138   |
| H(20A) | 1226 | 3024 | 110  | 250   |
| H(20B) | 628  | 2776 | 183  | 250   |
| H(20C) | 907  | 2653 | 604  | 250   |
| H(22)  | 446  | 5711 | 1420 | 66    |
| H(23)  | -99  | 6464 | 993  | 82    |
| H(25)  | -962 | 6650 | 2143 | 70    |
| H(26)  | -374 | 5953 | 2573 | 75    |
| H(28A) | -451 | 7751 | 774  | 261   |
| H(28B) | -896 | 7586 | 559  | 261   |
| H(28C) | -356 | 7195 | 646  | 261   |

|        |       |      |      |     |
|--------|-------|------|------|-----|
| H(29A) | -1292 | 6466 | 1081 | 247 |
| H(29B) | -1556 | 7089 | 880  | 247 |
| H(29C) | -1733 | 6713 | 1404 | 247 |
| H(30A) | -1437 | 7295 | 1756 | 268 |
| H(30B) | -948  | 7735 | 1466 | 268 |
| H(30C) | -1485 | 7749 | 1269 | 268 |
| H(32)  | 2219  | 3993 | 5182 | 31  |
| H(33)  | 2844  | 4079 | 5599 | 38  |
| H(35)  | 3407  | 5582 | 4600 | 43  |
| H(36)  | 2735  | 5529 | 4210 | 27  |
| H(38A) | 3537  | 5776 | 5214 | 56  |
| H(38B) | 3860  | 5498 | 5617 | 56  |
| H(38C) | 3205  | 5427 | 5709 | 56  |
| H(39A) | 3274  | 4354 | 6048 | 61  |
| H(39B) | 3917  | 4450 | 5999 | 61  |
| H(39C) | 3732  | 4023 | 5803 | 61  |
| H(40A) | 4304  | 4537 | 5055 | 65  |
| H(40B) | 4500  | 4977 | 5234 | 65  |
| H(40C) | 4233  | 5208 | 4798 | 65  |
| H(42)  | 2293  | 1772 | 5285 | 36  |
| H(43)  | 2528  | 1394 | 6005 | 36  |
| H(45)  | 1889  | 2789 | 6254 | 54  |
| H(46)  | 1598  | 3137 | 5577 | 44  |
| H(48A) | 2409  | 2558 | 6771 | 117 |
| H(48B) | 2457  | 2002 | 7205 | 117 |
| H(48C) | 1888  | 2151 | 7032 | 117 |
| H(49A) | 3247  | 1529 | 6401 | 139 |
| H(49B) | 3244  | 1711 | 6817 | 139 |
| H(49C) | 3245  | 2189 | 6330 | 139 |
| H(50A) | 1874  | 1209 | 6907 | 143 |
| H(50B) | 2324  | 1092 | 7212 | 143 |
| H(50C) | 2472  | 960  | 6760 | 143 |
| H(52)  | 5497  | 3957 | 2398 | 40  |
| H(53)  | 6241  | 4493 | 2342 | 39  |
| H(55)  | 5931  | 4019 | 3688 | 42  |
| H(56)  | 5184  | 3486 | 3757 | 41  |
| H(58A) | 7157  | 4707 | 2370 | 79  |
| H(58B) | 7228  | 5248 | 2491 | 79  |



|        |      |      |      |     |
|--------|------|------|------|-----|
| H(58C) | 6686 | 5191 | 2324 | 79  |
| H(59A) | 6267 | 5414 | 3003 | 78  |
| H(59B) | 6794 | 5279 | 3232 | 78  |
| H(59C) | 6234 | 4936 | 3494 | 78  |
| H(60A) | 6931 | 4065 | 3555 | 90  |
| H(60B) | 7425 | 4456 | 3200 | 90  |
| H(60C) | 7203 | 3949 | 3107 | 90  |
| H(62)  | 5568 | 4356 | 1559 | 33  |
| H(63)  | 6439 | 4723 | 1460 | 34  |
| H(65)  | 5826 | 6331 | 978  | 31  |
| H(66)  | 4965 | 5964 | 1099 | 35  |
| H(68A) | 7044 | 5818 | 340  | 75  |
| H(68B) | 7314 | 6346 | 371  | 75  |
| H(68C) | 6668 | 6355 | 373  | 75  |
| H(69A) | 7200 | 5076 | 1443 | 70  |
| H(69B) | 7660 | 5496 | 1068 | 70  |
| H(69C) | 7316 | 5105 | 936  | 70  |
| H(70A) | 6624 | 6532 | 1165 | 87  |
| H(70B) | 7274 | 6401 | 1112 | 87  |
| H(70C) | 6855 | 6032 | 1558 | 87  |
| H(72)  | 5674 | 3366 | 1448 | 43  |
| H(73)  | 6557 | 3244 | 1553 | 33  |
| H(75)  | 6055 | 2155 | 2843 | 44  |
| H(76)  | 5152 | 2215 | 2721 | 29  |
| H(78A) | 6948 | 2213 | 2981 | 132 |
| H(78B) | 7532 | 2129 | 2684 | 132 |
| H(78C) | 6996 | 1820 | 2691 | 132 |
| H(79A) | 7276 | 2176 | 1913 | 140 |
| H(79B) | 7777 | 2479 | 1968 | 140 |
| H(79C) | 7392 | 2838 | 1625 | 140 |
| H(80A) | 6942 | 3560 | 2098 | 157 |
| H(80B) | 7553 | 3326 | 2153 | 157 |
| H(80C) | 7078 | 3259 | 2588 | 157 |
| H(82)  | 2886 | 5881 | 566  | 37  |
| H(83)  | 2236 | 6286 | 107  | 44  |
| H(85)  | 2085 | 4747 | 7    | 33  |
| H(86)  | 2783 | 4334 | 455  | 34  |
| H(88A) | 1686 | 5162 | -520 | 78  |

|        |       |      |      |     |
|--------|-------|------|------|-----|
| H(88B) | 1173  | 5582 | -640 | 78  |
| H(88C) | 1139  | 5120 | -143 | 78  |
| H(89A) | 1046  | 5741 | 331  | 102 |
| H(89B) | 828   | 6156 | -106 | 102 |
| H(89C) | 1277  | 6375 | 73   | 102 |
| H(90A) | 2035  | 6619 | -628 | 110 |
| H(90B) | 1660  | 6479 | -911 | 110 |
| H(90C) | 2245  | 6164 | -862 | 110 |
| H(92)  | 2988  | 3270 | 685  | 38  |
| H(93)  | 2546  | 2812 | 341  | 43  |
| H(95)  | 2937  | 1247 | 1177 | 39  |
| H(96)  | 3355  | 1697 | 1545 | 36  |
| H(98A) | 1980  | 1234 | 1052 | 130 |
| H(98B) | 1922  | 1034 | 657  | 130 |
| H(98C) | 1627  | 1611 | 688  | 130 |
| H(99A) | 3283  | 1418 | 260  | 168 |
| H(99B) | 2874  | 1318 | -16  | 168 |
| H(99C) | 2853  | 905  | 494  | 168 |
| H(10D) | 1951  | 2320 | 85   | 137 |
| H(10E) | 2232  | 1913 | -178 | 137 |
| H(10F) | 2586  | 2403 | -170 | 137 |
| H(102) | 423   | 3412 | 1941 | 47  |
| H(103) | -314  | 3945 | 1579 | 54  |
| H(105) | -880  | 4503 | 2596 | 38  |
| H(106) | -212  | 3990 | 2976 | 43  |
| H(10G) | -600  | 5299 | 1284 | 72  |
| H(10H) | -1128 | 5226 | 1108 | 72  |
| H(10I) | -623  | 4781 | 1124 | 72  |
| H(10J) | -1608 | 4879 | 2294 | 70  |
| H(10K) | -1713 | 5283 | 1809 | 70  |
| H(10L) | -1162 | 5348 | 1960 | 70  |
| H(11A) | -1347 | 4002 | 1599 | 82  |
| H(11B) | -1849 | 4425 | 1669 | 82  |
| H(11C) | -1653 | 3952 | 2095 | 82  |
| H(112) | 1773  | 1124 | 2199 | 90  |
| H(113) | 1169  | 507  | 2174 | 96  |
| H(115) | 297   | 1759 | 1444 | 59  |
| H(116) | 865   | 2475 | 1500 | 60  |

|        |       |       |      |     |
|--------|-------|-------|------|-----|
| H(11D) | -206  | 1281  | 1424 | 190 |
| H(11E) | -418  | 652   | 1549 | 190 |
| H(11F) | 90    | 906   | 1138 | 190 |
| H(11G) | 340   | 60    | 2404 | 187 |
| H(11H) | -115  | -104  | 2197 | 187 |
| H(11I) | -239  | 396   | 2391 | 187 |
| H(12A) | 963   | 448   | 1322 | 190 |
| H(12B) | 458   | 19    | 1486 | 190 |
| H(12C) | 856   | -25   | 1819 | 190 |
| H(122) | 4044  | 1656  | 2328 | 27  |
| H(123) | 4728  | 1491  | 1767 | 36  |
| H(125) | 3773  | 255   | 1804 | 44  |
| H(126) | 3068  | 447   | 2348 | 40  |
| H(12D) | 5247  | 1461  | 1086 | 102 |
| H(12E) | 5596  | 934   | 1002 | 102 |
| H(12F) | 5452  | 961   | 1493 | 102 |
| H(12G) | 5024  | -67   | 1748 | 87  |
| H(12H) | 5171  | 2     | 1231 | 87  |
| H(12I) | 4553  | -145  | 1515 | 87  |
| H(13A) | 4178  | 655   | 973  | 88  |
| H(13B) | 4750  | 927   | 655  | 88  |
| H(13C) | 4318  | 1298  | 879  | 88  |
| H(132) | 91    | 852   | 3530 | 40  |
| H(133) | -686  | 722   | 4139 | 41  |
| H(135) | 274   | 1040  | 4873 | 42  |
| H(136) | 1057  | 1104  | 4293 | 37  |
| H(13D) | -474  | 183   | 5434 | 90  |
| H(13E) | -984  | 497   | 5647 | 90  |
| H(13F) | -396  | 800   | 5437 | 90  |
| H(13G) | -1456 | 707   | 4688 | 106 |
| H(13H) | -1520 | 345   | 5214 | 106 |
| H(13I) | -1085 | 146   | 4858 | 106 |
| H(14A) | -758  | 1627  | 4968 | 131 |
| H(14B) | -1382 | 1414  | 5102 | 131 |
| H(14C) | -1069 | 1643  | 4587 | 131 |
| H(142) | 3715  | 150   | 3329 | 29  |
| H(143) | 4087  | -514  | 2952 | 40  |
| H(145) | 2733  | -1484 | 3571 | 66  |

|        |      |       |      |     |
|--------|------|-------|------|-----|
| H(146) | 2402 | -919  | 3998 | 55  |
| H(14D) | 3057 | -2069 | 3306 | 96  |
| H(14E) | 3387 | -2138 | 2851 | 96  |
| H(14F) | 2946 | -1631 | 2832 | 96  |
| H(14G) | 3573 | -816  | 2361 | 89  |
| H(14H) | 3944 | -1329 | 2273 | 89  |
| H(14I) | 4204 | -887  | 2413 | 89  |
| H(15A) | 4442 | -1569 | 3164 | 107 |
| H(15B) | 4333 | -2079 | 3019 | 107 |
| H(15C) | 4018 | -2062 | 3496 | 107 |
| H(152) | 5433 | 941   | 3888 | 33  |
| H(153) | 6164 | 740   | 3388 | 49  |
| H(155) | 5096 | 795   | 2578 | 47  |
| H(156) | 4383 | 1095  | 3061 | 40  |
| H(15D) | 5933 | 1201  | 2024 | 113 |
| H(15E) | 6571 | 1032  | 1907 | 113 |
| H(15F) | 6387 | 1443  | 2183 | 113 |
| H(15G) | 6869 | 824   | 2732 | 118 |
| H(15H) | 7013 | 338   | 2523 | 118 |
| H(15I) | 6696 | 178   | 3035 | 118 |
| H(16A) | 5937 | -260  | 2824 | 142 |
| H(16B) | 6342 | -78   | 2341 | 142 |
| H(16C) | 5712 | 139   | 2387 | 142 |
| H(162) | 4786 | 2112  | 4365 | 36  |
| H(163) | 5390 | 1524  | 4828 | 47  |
| H(165) | 4121 | 1195  | 5944 | 50  |
| H(166) | 3538 | 1786  | 5478 | 29  |
| H(16D) | 5174 | 259   | 5483 | 88  |
| H(16E) | 5690 | 151   | 5722 | 88  |
| H(16F) | 5727 | 619   | 5227 | 88  |
| H(16G) | 5923 | 1481  | 5381 | 82  |
| H(16H) | 5991 | 1075  | 5876 | 82  |
| H(16I) | 5566 | 1603  | 5807 | 82  |
| H(17A) | 4882 | 895   | 6360 | 70  |
| H(17B) | 5231 | 327   | 6374 | 70  |
| H(17C) | 4638 | 422   | 6242 | 70  |
| H(172) | 2261 | 411   | 5343 | 31  |
| H(173) | 1598 | 301   | 6010 | 55  |

|        |       |      |      |     |
|--------|-------|------|------|-----|
| H(175) | 681   | 1590 | 5320 | 37  |
| H(176) | 1348  | 1756 | 4653 | 41  |
| H(17D) | 367   | 1733 | 6040 | 113 |
| H(17E) | -59   | 1288 | 6430 | 113 |
| H(17F) | -3    | 1352 | 5919 | 113 |
| H(17G) | 141   | 348  | 6119 | 125 |
| H(17H) | 30    | 322  | 6625 | 125 |
| H(17I) | 579   | 38   | 6428 | 125 |
| H(18D) | 1132  | 514  | 6630 | 154 |
| H(18E) | 689   | 925  | 6802 | 154 |
| H(18F) | 1216  | 1189 | 6413 | 154 |
| H(182) | 106   | 5706 | 3797 | 47  |
| H(183) | -791  | 5994 | 3691 | 52  |
| H(185) | -942  | 4568 | 3425 | 40  |
| H(186) | -76   | 4267 | 3587 | 36  |
| H(18G) | -1879 | 4643 | 3923 | 79  |
| H(18H) | -2366 | 5110 | 3857 | 79  |
| H(18I) | -1961 | 5074 | 4183 | 79  |
| H(18J) | -1502 | 5756 | 2800 | 95  |
| H(18K) | -2099 | 5491 | 3060 | 95  |
| H(18L) | -1573 | 5079 | 3031 | 95  |
| H(19D) | -1771 | 6077 | 3816 | 88  |
| H(19E) | -2119 | 6192 | 3435 | 88  |
| H(19F) | -1479 | 6355 | 3297 | 88  |
| H(192) | 261   | 2153 | 3737 | 38  |
| H(193) | -556  | 2120 | 3504 | 35  |
| H(195) | -1254 | 3305 | 4005 | 48  |
| H(196) | -448  | 3317 | 4267 | 31  |
| H(19G) | -1345 | 3223 | 2892 | 122 |
| H(19H) | -1702 | 2689 | 2968 | 122 |
| H(19I) | -1059 | 2607 | 2982 | 122 |
| H(19J) | -1504 | 1844 | 3631 | 141 |
| H(19K) | -2122 | 2095 | 3673 | 141 |
| H(19L) | -1810 | 1943 | 4080 | 141 |
| H(20D) | -2093 | 3025 | 3983 | 149 |
| H(20E) | -2306 | 3110 | 3538 | 149 |
| H(20F) | -1826 | 3505 | 3516 | 149 |
| H(202) | 3388  | 3537 | 4842 | 34  |

|        |      |       |       |     |
|--------|------|-------|-------|-----|
| H(203) | 3890 | 3044  | 5403  | 29  |
| H(205) | 5286 | 3859  | 4566  | 33  |
| H(206) | 4769 | 4351  | 4012  | 35  |
| H(20G) | 5403 | 3841  | 5353  | 55  |
| H(20H) | 5325 | 3377  | 5853  | 55  |
| H(20I) | 4808 | 3756  | 5683  | 55  |
| H(20J) | 5442 | 2625  | 5060  | 64  |
| H(20K) | 5757 | 2647  | 5427  | 64  |
| H(20L) | 5768 | 3187  | 4970  | 64  |
| H(21A) | 4336 | 2769  | 5966  | 65  |
| H(21B) | 4906 | 2447  | 6066  | 65  |
| H(21C) | 4594 | 2322  | 5736  | 65  |
| H(212) | 2726 | 6735  | 876   | 37  |
| H(213) | 3210 | 7226  | 158   | 38  |
| H(215) | 1742 | 7733  | -240  | 60  |
| H(216) | 1256 | 7184  | 496   | 39  |
| H(21D) | 3519 | 7288  | -622  | 126 |
| H(21E) | 3410 | 7651  | -1114 | 126 |
| H(21F) | 3003 | 7146  | -778  | 126 |
| H(21G) | 2257 | 7876  | -962  | 146 |
| H(21H) | 2703 | 8365  | -1251 | 146 |
| H(21I) | 2252 | 8430  | -839  | 146 |
| H(22A) | 2990 | 8594  | -516  | 130 |
| H(22B) | 3448 | 8526  | -923  | 130 |
| H(22C) | 3491 | 8150  | -415  | 130 |
| H(222) | 2780 | 7784  | 1022  | 69  |
| H(223) | 3438 | 8403  | 451   | 71  |
| H(225) | 3872 | 8961  | 1346  | 62  |
| H(226) | 3169 | 8370  | 1913  | 47  |
| H(22D) | 3529 | 9684  | 32    | 188 |
| H(22E) | 4156 | 9755  | -241  | 188 |
| H(22F) | 3823 | 9193  | -137  | 188 |
| H(22G) | 3910 | 9842  | 688   | 189 |
| H(22H) | 4389 | 10012 | 245   | 189 |
| H(22I) | 4519 | 9579  | 714   | 189 |
| H(231) | 3906 | 6673  | 3719  | 39  |
| H(232) | 3487 | 6850  | 4349  | 53  |
| H(234) | 1955 | 6794  | 4067  | 51  |

|        |      |      |      |     |
|--------|------|------|------|-----|
| H(235) | 2398 | 6665 | 3406 | 32  |
| H(23A) | 1784 | 6328 | 4953 | 117 |
| H(23B) | 1923 | 6468 | 5353 | 117 |
| H(23C) | 2352 | 6105 | 5118 | 117 |
| H(23D) | 3143 | 6987 | 4842 | 146 |
| H(23E) | 2651 | 6983 | 5253 | 146 |
| H(23F) | 2802 | 7560 | 4826 | 146 |
| H(23G) | 2079 | 7803 | 4365 | 158 |
| H(23H) | 1764 | 7541 | 4879 | 158 |
| H(23I) | 1632 | 7314 | 4520 | 158 |
| H(241) | 4758 | 5699 | 3252 | 40  |
| H(242) | 5260 | 6421 | 3276 | 35  |
| H(244) | 6140 | 6664 | 2014 | 48  |
| H(245) | 5687 | 5921 | 2008 | 44  |
| H(24A) | 6317 | 6984 | 3278 | 187 |
| H(24B) | 6822 | 6867 | 2922 | 187 |
| H(24C) | 6353 | 6398 | 3196 | 187 |
| H(24D) | 6814 | 7132 | 2176 | 152 |
| H(24E) | 6652 | 7731 | 2231 | 152 |
| H(24F) | 6310 | 7501 | 1975 | 152 |
| H(24G) | 5569 | 7750 | 2513 | 198 |
| H(24H) | 5928 | 7774 | 2853 | 198 |
| H(24I) | 5419 | 7348 | 3032 | 198 |
| H(251) | 3615 | 5929 | 1033 | 20  |
| H(252) | 4138 | 6082 | 320  | 30  |
| H(254) | 4884 | 7420 | 325  | 36  |
| H(255) | 4343 | 7311 | 1034 | 38  |
| H(25A) | 4843 | 6003 | -113 | 107 |
| H(25B) | 5210 | 6328 | -601 | 107 |
| H(25C) | 4556 | 6440 | -503 | 107 |
| H(25D) | 4546 | 7422 | -632 | 225 |
| H(25E) | 5193 | 7426 | -843 | 225 |
| H(25F) | 4968 | 7700 | -469 | 225 |
| H(25G) | 5727 | 7065 | -161 | 170 |
| H(25H) | 5785 | 6621 | -409 | 170 |
| H(25I) | 5570 | 6411 | 123  | 170 |
| H(26A) | 4826 | 8803 | 582  | 175 |
| H(26B) | 4866 | 9114 | 53   | 175 |

H(26C)

4560

8516

318

175

---
